# Supplementary material for: Multi-omics based characterization of antibiotic response in clinical isogenic isolates of methicillin-susceptible/-resistant Staphylococcus aureus
Source: Royal Society of Chemistry journal article supplement (doi:10.1039/d0ra05407k), 2020-01-01
Supplement: d0ra05407k1.pdf [file d0ra05407k1.pdf]

## Electronic Supplementary Information (ESI)

### Multi-omics based characterization of antibiotic response in clinical isogenic isolates of methicillin-susceptible/-resistant *Staphylococcus aureus*

Sung-Hyun Jo<sup>a</sup>, Won-Suk Song<sup>b</sup>, Han-Gyu Park<sup>a</sup>, Jae-Seung Lee<sup>a</sup>, Hyo-Jin Jeon<sup>a</sup>, Yeon-Hee Lee<sup>c</sup>, Wooseong Kim<sup>d</sup>, Hwang-Soo Joo<sup>c</sup>, Yung-Hun Yang<sup>e</sup>, Jae-Seok Kim<sup>f</sup>, and Yun-Gon Kim<sup>a,\*</sup>

<sup>a</sup>*Department of Chemical Engineering, College of Engineering, Soongsil University, Seoul 06978, Republic of Korea*

<sup>b</sup>*School of Chemical and Biological Engineering, Seoul National University, Seoul 08826, Republic of Korea*

<sup>c</sup>*Department of Biotechnology, Duksung Women's University, Seoul 01369, Republic of Korea*

<sup>d</sup>*College of Pharmacy, Graduate School of Pharmaceutical Sciences, Ewha Womans University, Seoul 03760, Republic of Korea*

<sup>e</sup>*Department of Microbial Engineering, College of Engineering, Konkuk University, Seoul 05029, Republic of Korea*

<sup>f</sup>*Department of Laboratory Medicine, Kangdong Sacred Heart Hospital, Hallym University College of Medicine, Seoul 05355, Republic of Korea*

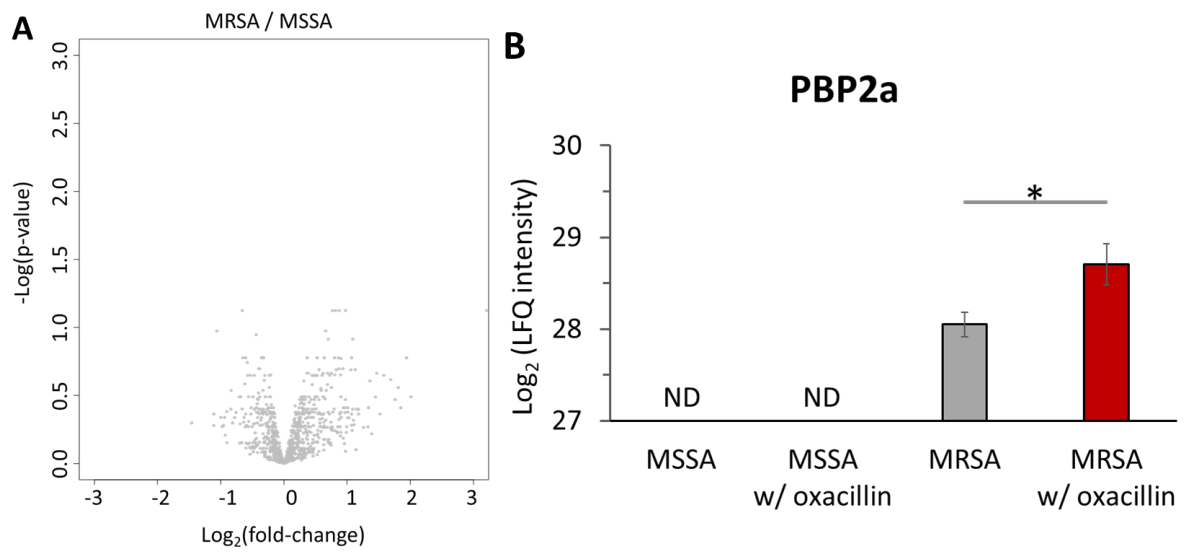

**Fig S1.** Volcano plot of proteomic analysis for MSSA and MRSA without oxacillin. There are no statistically significant proteins. (B) Penicillin-binding protein 2a (PBP2a) encoded by the *mecA* gene was up-regulated in oxacillin treated MRSA than MRSA without oxacillin. PBP2a was not detected in MSSA. The symbol (\*) indicates a statistically significant difference (n = 4, p < 0.05). Error bars indicate standard deviation.

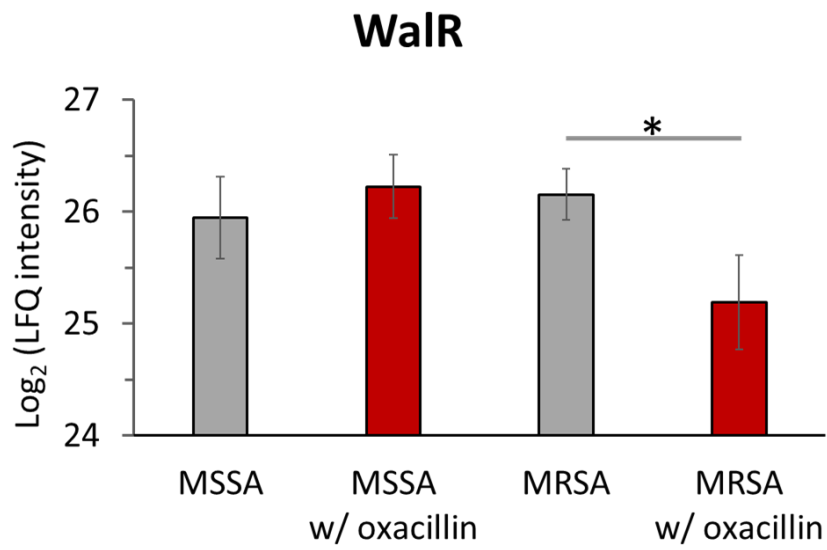

**Fig S2.** Bar graph of LFQ intensity level of WalK. The symbol (\*) indicates a statistically significant difference ( $n = 4$ ,  $p < 0.05$ ). Error bars indicate standard deviation.

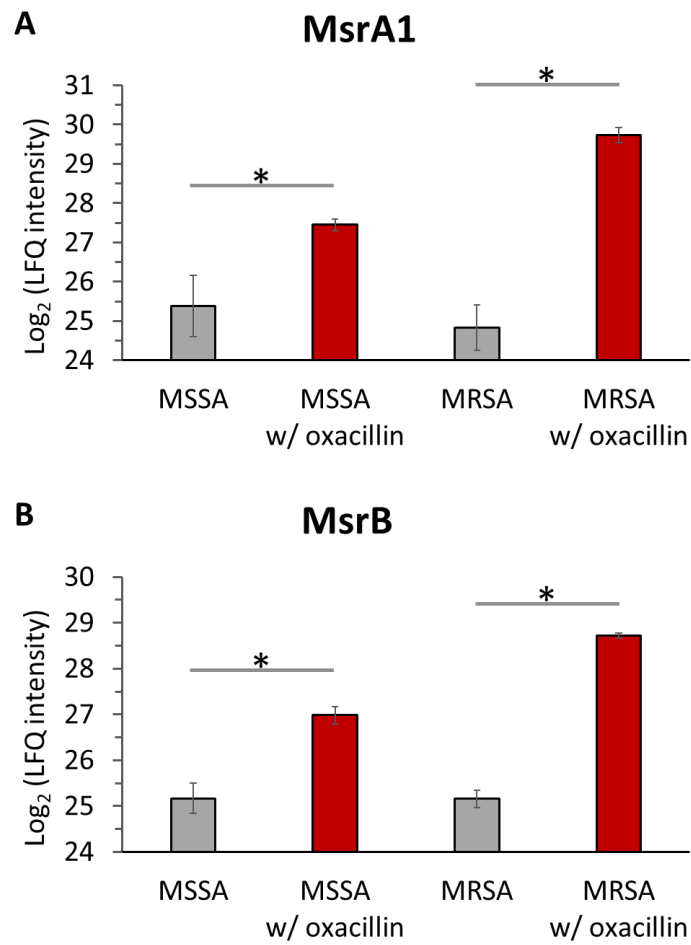

**Fig S3.** Bar graph of LFQ intensity levels of (A) MsrA1 and (B) MsrB (Methionine sulfoxide reductases). The symbol (\*) indicates a statistically significant difference (n = 4, p < 0.05). Error bars indicate standard deviation.

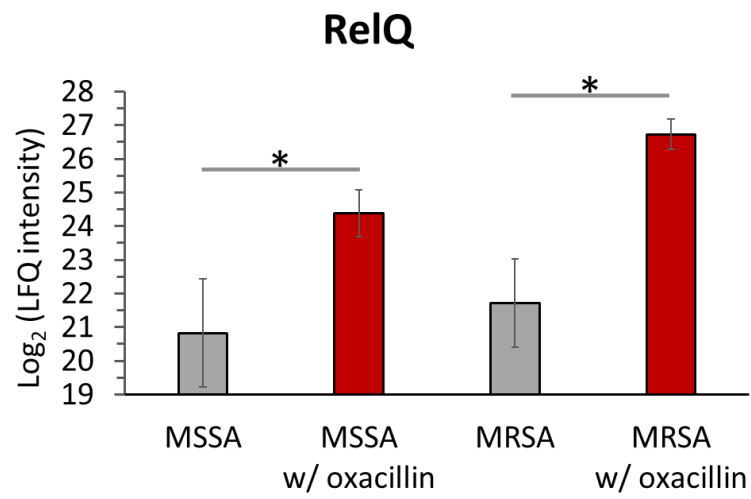

**Fig S4.** Bar graph of LFQ intensity level of RelQ. The symbol (\*) indicates a statistically significant difference (n = 4, p < 0.05). Error bars indicate standard deviation.

**Table S1. List of identified proteins in the intracellular proteome analysis.**

| RAST IDs                     | Protein function (the seed)                                                                                          | Gene name | log2 fold change (MRSA with oxacillin / MSSA with oxacillin) | log2 fold change (MRSA/ MSSA) | log2 fold change (MRSA with oxacillin/ MRSA) | log2 fold change (MSSA with oxacillin/ MSSA) | adjusted p-value (MRSA with oxacillin/ MSSA with oxacillin) | adjusted p-value (MRSA/ MSSA) | adjusted p-value (MRSA with oxacillin/ MRSA) | adjusted p-value (MSSA with oxacillin/ MSSA) |
|------------------------------|----------------------------------------------------------------------------------------------------------------------|-----------|--------------------------------------------------------------|-------------------------------|----------------------------------------------|----------------------------------------------|-------------------------------------------------------------|-------------------------------|----------------------------------------------|----------------------------------------------|
| fig 6666666.474.865.peg.1111 | Penicillin-binding protein PBP2a, methicillin resistance determinant MecA, transpeptidase                            | mecA      | Not detectable in MSSA                                       |                               |                                              |                                              |                                                             |                               |                                              |                                              |
| fig 6666666.474.865.peg.1125 | ORFID:MW0043                                                                                                         |           | 1.73                                                         | 3.21                          | -0.887                                       | 0.592                                        | 0.118                                                       | 0.0751                        | 0.32                                         | 0.519                                        |
| fig 6666666.474.865.peg.191  | 3'->5' exoribonuclease Bsu YhaM                                                                                      |           | -0.468                                                       | 2.01                          | -0.0654                                      | 2.42                                         | 0.734                                                       | 0.323                         | 0.959                                        | 0.027                                        |
| fig 6666666.474.865.peg.1105 | FIG01108167: hypothetical protein                                                                                    |           | 0.123                                                        | 1.94                          | -1.3                                         | 0.516                                        | 0.911                                                       | 0.167                         | 0.0737                                       | 0.486                                        |
| fig 6666666.474.865.peg.1408 | Potassium efflux system KefA protein / Small-conductance mechanosensitive channel                                    |           | 1.84                                                         | 1.85                          | 1.81                                         | 1.82                                         | 0.168                                                       | 0.389                         | 0.0975                                       | 0.0975                                       |
| fig 6666666.474.865.peg.2370 | SOS-response repressor and protease LexA (EC 3.4.21.88)                                                              |           | -0.464                                                       | 1.81                          | -0.924                                       | 1.35                                         | 0.694                                                       | 0.276                         | 0.296                                        | 0.126                                        |
| fig 6666666.474.865.peg.1855 | Cell division inhibitor Slr1223 (YfcH in EC), contains epimerase/dehydratase and DUF1731 domains                     |           | -0.941                                                       | 1.76                          | -0.0355                                      | 2.66                                         | 0.456                                                       | 0.339                         | 0.976                                        | 0.012                                        |
| fig 6666666.474.865.peg.887  | LPXTG specific sortase A                                                                                             |           | 0.236                                                        | 1.69                          | 0.205                                        | 1.66                                         | 0.832                                                       | 0.242                         | 0.827                                        | 0.0396                                       |
| fig 6666666.474.865.peg.2386 | Sodium:alanine symporter family protein                                                                              |           | -0.535                                                       | 1.58                          | -0.0506                                      | 2.07                                         | 0.561                                                       | 0.225                         | 0.955                                        | 0.00752                                      |
| fig 6666666.474.865.peg.1571 | Membrane-associated protein containing RNA-binding TRAM domain and ribonuclease PIN-domain, YacL B.subtilis ortholog |           | -0.303                                                       | 1.52                          | -0.286                                       | 1.53                                         | 0.84                                                        | 0.432                         | 0.823                                        | 0.147                                        |
| fig 6666666.474.865.peg.2635 | Hydroxyacylglutathione hydrolase (EC 3.1.2.6)                                                                        |           | -0.0844                                                      | 1.47                          | -0.0628                                      | 1.49                                         | 0.931                                                       | 0.217                         | 0.932                                        | 0.0219                                       |
| fig 6666666.474.865.peg.714  | Multidrug resistance protein [function not yet clear]                                                                |           | -0.623                                                       | 1.45                          | -0.516                                       | 1.55                                         | 0.541                                                       | 0.324                         | 0.532                                        | 0.0504                                       |
| fig 6666666.474.865.peg.2490 | MazG nucleotide pyrophosphohydrolase                                                                                 |           | -3.13                                                        | 1.39                          | -3.77                                        | 0.745                                        | 0.0806                                                      | 0.605                         | 0.0137                                       | 0.62                                         |
| fig 6666666.474.865.peg.710  | FIG01107838: hypothetical protein                                                                                    |           | 0.00595                                                      | 1.36                          | 0.314                                        | 1.67                                         | 0.992                                                       | 0.247                         | 0.659                                        | 0.0149                                       |
| fig 6666666.474.865.peg.1418 | Phage protein                                                                                                        |           | -1.39                                                        | 1.34                          | -1.06                                        | 1.66                                         | 0.159                                                       | 0.389                         | 0.188                                        | 0.0444                                       |
| fig 6666666.474.865.peg.193  | DNA repair exonuclease family protein YhaO                                                                           |           | -1.03                                                        | 1.33                          | -1.44                                        | 0.919                                        | 0.502                                                       | 0.537                         | 0.224                                        | 0.443                                        |
| fig 6666666.474.865.peg.1607 | Adhesin of unknown specificity SdrE, similar to bone sialoprotein-binding protein Bbp                                |           | -1.17                                                        | 1.26                          | -2.25                                        | 0.168                                        | 0.435                                                       | 0.543                         | 0.0542                                       | 0.891                                        |
| fig 6666666.474.865.peg.1499 | Esterase/lipase family protein                                                                                       |           | 0.179                                                        | 1.18                          | 1.66                                         | 2.67                                         | 0.868                                                       | 0.399                         | 0.0285                                       | 0.00219                                      |

|                                 |                                                                                                      |      |         |       |        |        |        |        |          |          |
|---------------------------------|------------------------------------------------------------------------------------------------------|------|---------|-------|--------|--------|--------|--------|----------|----------|
| fig/6666666.474<br>865.peg.1004 | Phage infection protein                                                                              |      | -0.811  | 1.18  | -1.4   | 0.587  | 0.454  | 0.433  | 0.0957   | 0.495    |
| fig/6666666.474<br>865.peg.52   | tRNA S(4)U 4-thiouridine synthase (former ThiI)                                                      |      | -0.0852 | 1.15  | 0.257  | 1.5    | 0.945  | 0.399  | 0.764    | 0.0442   |
| fig/6666666.474<br>865.peg.59   | Phosphoserine aminotransferase, putative (EC 2.6.1.52)                                               |      | 0.535   | 1.14  | -0.643 | -0.034 | 0.845  | 0.791  | 0.779    | 0.988    |
| fig/6666666.474<br>865.peg.2123 | COG1399 protein in cluster with ribosomal protein L32p, Firmicutes subfamily                         |      | -0.522  | 1.13  | 0.567  | 2.22   | 0.367  | 0.204  | 0.218    | 0.000282 |
| fig/6666666.474<br>865.peg.2282 | FIG002344: Hydrolase (HAD superfamily)                                                               |      | 0.491   | 1.11  | 0.315  | 0.933  | 0.694  | 0.519  | 0.774    | 0.319    |
| fig/6666666.474<br>865.peg.2348 | FIG01107992: hypothetical protein                                                                    |      | -0.985  | 1.1   | -2     | 0.0912 | 0.358  | 0.48   | 0.0245   | 0.92     |
| fig/6666666.474<br>865.peg.1104 | LSU m3Psi1915 methyltransferase RlmH                                                                 |      | 0.602   | 1.09  | 0.0258 | 0.513  | 0.162  | 0.122  | 0.955    | 0.146    |
| fig/6666666.474<br>865.peg.999  | immunodominant antigen B                                                                             |      | -0.0779 | 1.09  | -0.769 | 0.399  | 0.946  | 0.399  | 0.256    | 0.57     |
| fig/6666666.474<br>865.peg.1573 | Serine acetyltransferase (EC 2.3.1.30)                                                               |      | -0.93   | 1.08  | -1.19  | 0.815  | 0.483  | 0.571  | 0.248    | 0.436    |
| fig/6666666.474<br>865.peg.2442 | 2-oxoglutarate dehydrogenase E1 component (EC 1.2.4.2)                                               |      | -0.934  | 1.07  | -1.58  | 0.426  | 0.0619 | 0.167  | 0.000971 | 0.286    |
| fig/6666666.474<br>865.peg.2139 | DNA polymerase X family                                                                              |      | -0.419  | 1.07  | -0.209 | 1.28   | 0.726  | 0.522  | 0.846    | 0.154    |
| fig/6666666.474<br>865.peg.2469 | Probable 5'-3' exonuclease Bsu YpcP                                                                  |      | 0.134   | 1.07  | 0.182  | 1.12   | 0.908  | 0.433  | 0.843    | 0.14     |
| fig/6666666.474<br>865.peg.2196 | Aspartate carbamoyltransferase (EC 2.1.3.2)                                                          |      | 0.0868  | 1.06  | -0.599 | 0.376  | 0.897  | 0.205  | 0.17     | 0.397    |
| fig/6666666.474<br>865.peg.2720 | CsdL (EC-YgdL) protein of the HesA/MoeB/ThiF family, part of the CsdA-E-L sulfur transfer pathway    |      | -0.071  | 1.03  | 0.127  | 1.23   | 0.962  | 0.461  | 0.892    | 0.113    |
| fig/6666666.474<br>865.peg.2616 | Alkaline shock protein                                                                               |      | -0.879  | 1.01  | -0.156 | 1.73   | 0.238  | 0.389  | 0.831    | 0.00929  |
| fig/6666666.474<br>865.peg.55   | Free methionine-(R)-sulfoxide reductase, contains GAF domain                                         |      | 0.383   | 1.01  | 0.928  | 1.56   | 0.711  | 0.461  | 0.223    | 0.0459   |
| fig/6666666.474<br>865.peg.12   | GTP-binding protein EngB                                                                             |      | 0.303   | 1.01  | -0.619 | 0.0859 | 0.734  | 0.419  | 0.364    | 0.907    |
| fig/6666666.474<br>865.peg.668  | Cell envelope-associated transcriptional attenuator LytR-CpsA-Psr, subfamily F2 (as in PMID19099556) | msrR | 1.62    | 0.993 | 2.48   | 1.85   | 0.131  | 0.536  | 0.00868  | 0.0385   |
| fig/6666666.474<br>865.peg.81   | FIG002434: Uncharacterized protein YtpQ                                                              |      | -1.12   | 0.988 | -1.16  | 0.943  | 0.368  | 0.59   | 0.239    | 0.344    |
| fig/6666666.474<br>865.peg.476  | Hypothetical protein ywlG                                                                            |      | 0.124   | 0.976 | -1.04  | -0.193 | 0.966  | 0.813  | 0.59     | 0.92     |
| fig/6666666.474<br>865.peg.1657 | Predicted hydrolase                                                                                  |      | 0.0202  | 0.974 | 0.62   | 1.57   | 0.963  | 0.0751 | 0.0199   | 4.09E-05 |
| fig/6666666.474<br>865.peg.2741 | FIG01108101: hypothetical protein                                                                    |      | 1.75    | 0.973 | 4.12   | 3.34   | 0.016  | 0.339  | 4.18E-06 | 4.27E-05 |
| fig/6666666.474<br>865.peg.2439 | FIG01108295: hypothetical protein                                                                    |      | 0.755   | 0.965 | -0.619 | -0.41  | 0.351  | 0.422  | 0.341    | 0.543    |

|                                 |                                                                                      |      |         |       |         |         |       |        |          |          |
|---------------------------------|--------------------------------------------------------------------------------------|------|---------|-------|---------|---------|-------|--------|----------|----------|
| fig/6666666.474<br>865.peg.2705 | peptidase, U32 family small subunit [C1]                                             |      | 0.0121  | 0.958 | -0.216  | 0.73    | 0.984 | 0.389  | 0.749    | 0.206    |
| fig/6666666.474<br>865.peg.361  | Leukocidin LukS-PV                                                                   |      | -1.58   | 0.955 | -2.57   | -0.04   | 0.331 | 0.714  | 0.0523   | 0.978    |
| fig/6666666.474<br>865.peg.2120 | 16S rRNA (guanine(966)-N(2))-methyltransferase (EC 2.1.1.171)                        |      | -0.295  | 0.94  | 0.471   | 1.71    | 0.694 | 0.389  | 0.409    | 0.00633  |
| fig/6666666.474<br>865.peg.2258 | Intramembrane protease RasP/YluC, implicated in cell division based on FtsL cleavage |      | 0.962   | 0.939 | 1.75    | 1.73    | 0.475 | 0.652  | 0.0949   | 0.0985   |
| fig/6666666.474<br>865.peg.2039 | Menaquinone-specific isochorismate synthase (EC 5.4.4.2)                             |      | -0.352  | 0.934 | -0.302  | 0.984   | 0.461 | 0.201  | 0.428    | 0.014    |
| fig/6666666.474<br>865.peg.1683 | N-acetylmannosaminyltransferase (EC 2.4.1.187)                                       |      | -0.568  | 0.906 | 0.185   | 1.66    | 0.513 | 0.458  | 0.817    | 0.019    |
| fig/6666666.474<br>865.peg.2649 | UPF0135 protein Bsu YqfO @ Bsu YqfO NIF3/CutA domain                                 |      | -0.57   | 0.904 | 0.119   | 1.59    | 0.645 | 0.59   | 0.919    | 0.0775   |
| fig/6666666.474<br>865.peg.1329 | ESAT-6/Esx family secreted protein EsxA/Yuke                                         |      | 0.298   | 0.902 | -3.57   | -2.97   | 0.658 | 0.323  | 5.16E-06 | 4.23E-05 |
| fig/6666666.474<br>865.peg.1803 | Lipoteichoic acid synthase LtaS Type Ib                                              |      | -0.106  | 0.902 | -0.0971 | 0.91    | 0.83  | 0.169  | 0.815    | 0.014    |
| fig/6666666.474<br>865.peg.875  | Fructose-1,6-bisphosphatase, Bacillus type (EC 3.1.3.11)                             |      | -0.962  | 0.901 | -0.138  | 1.73    | 0.19  | 0.419  | 0.849    | 0.009    |
| fig/6666666.474<br>865.peg.1464 | FIG01108224: hypothetical protein                                                    |      | -0.1    | 0.898 | -0.612  | 0.386   | 0.914 | 0.422  | 0.31     | 0.539    |
| fig/6666666.474<br>865.peg.2391 | Peptide methionine sulfoxide reductase regulator MsrR                                |      | 0.351   | 0.897 | 1.5     | 2.04    | 0.481 | 0.223  | 0.0012   | 0.000146 |
| fig/6666666.474<br>865.peg.865  | GTP pyrophosphokinase (EC 2.7.6.5)                                                   | relQ | 1.12    | 0.895 | 5.01    | 4.78    | 0.351 | 0.626  | 9.88E-05 | 0.000225 |
| fig/6666666.474<br>865.peg.852  | DNA/RNA helicase of DEAD/DEAH box family                                             |      | -0.0119 | 0.889 | -1.37   | -0.469  | 0.989 | 0.537  | 0.0832   | 0.567    |
| fig/6666666.474<br>865.peg.493  | Pantothenate kinase type II, eukaryotic (EC 2.7.1.33)                                |      | -0.117  | 0.885 | -0.0129 | 0.99    | 0.903 | 0.433  | 0.988    | 0.119    |
| fig/6666666.474<br>865.peg.1703 | Acetyltransferase GNAT family                                                        |      | 0.321   | 0.877 | 0.97    | 1.53    | 0.282 | 0.0751 | 0.000938 | 3.53E-05 |
| fig/6666666.474<br>865.peg.2025 | FIG01108367: hypothetical protein                                                    |      | 0.105   | 0.874 | -1.74   | -0.971  | 0.832 | 0.201  | 0.000152 | 0.011    |
| fig/6666666.474<br>865.peg.2174 | Cell division protein MraZ                                                           | mraZ | 1.07    | 0.872 | 3       | 2.79    | 0.19  | 0.475  | 0.000362 | 0.000843 |
| fig/6666666.474<br>865.peg.600  | SSU ribosomal protein S17p (S11e)                                                    |      | 0.289   | 0.86  | -0.627  | -0.0555 | 0.461 | 0.167  | 0.0439   | 0.872    |
| fig/6666666.474<br>865.peg.226  | Hypothetical protein FIG009695                                                       |      | -0.212  | 0.854 | -3.12   | -2.05   | 0.845 | 0.537  | 0.000766 | 0.0127   |
| fig/6666666.474<br>865.peg.1843 | Excinuclease ABC subunit B                                                           |      | 0.0962  | 0.849 | -0.38   | 0.372   | 0.948 | 0.595  | 0.697    | 0.684    |
| fig/6666666.474<br>865.peg.1854 | NAD-dependent malic enzyme (EC 1.1.1.38)                                             |      | -0.528  | 0.847 | -1.66   | -0.283  | 0.646 | 0.586  | 0.0503   | 0.756    |
| fig/6666666.474<br>865.peg.703  | ABC-type transport system, ATPase component                                          |      | 0.234   | 0.827 | -2.26   | -1.67   | 0.615 | 0.205  | 1.30E-05 | 0.000247 |



|                                 |                                                                                                           |      |         |       |         |         |         |        |          |          |
|---------------------------------|-----------------------------------------------------------------------------------------------------------|------|---------|-------|---------|---------|---------|--------|----------|----------|
| fig 6666666.474<br>865.peg.1503 | Cystathionine gamma-lyase (EC 4.4.1.1)                                                                    |      | 1.1     | 0.819 | 0.705   | 0.429   | 0.00175 | 0.0751 | 0.00649  | 0.0695   |
| fig 6666666.474<br>865.peg.1086 | NAD(P)HX dehydratase                                                                                      |      | -0.478  | 0.808 | -1.98   | -0.699  | 0.658   | 0.574  | 0.016    | 0.378    |
| fig 6666666.474<br>865.peg.2084 | Cytochrome d ubiquinol oxidase subunit I (EC 1.10.3.-)                                                    |      | 0.574   | 0.805 | 2.77    | 3       | 0.178   | 0.223  | 2.45E-06 | 2.20E-06 |
| fig 6666666.474<br>865.peg.2000 | GTP pyrophosphokinase (EC 2.7.6.5)                                                                        | relP | -0.28   | 0.801 | -0.35   | 0.731   | 0.475   | 0.167  | 0.248    | 0.0219   |
| fig 6666666.474<br>865.peg.2117 | Glycerophosphoryl diester phosphodiesterase (EC 3.1.4.46)                                                 |      | 0.249   | 0.793 | 1.73    | 2.27    | 0.704   | 0.397  | 0.00227  | 0.000363 |
| fig 6666666.474<br>865.peg.2708 | Putative Holliday junction resolvase YqgF                                                                 |      | 0.124   | 0.774 | 0.0746  | 0.724   | 0.868   | 0.419  | 0.908    | 0.154    |
| fig 6666666.474<br>865.peg.1546 | Peptidyl-tRNA hydrolase (EC 3.1.1.29)                                                                     |      | -0.538  | 0.772 | 0.00955 | 1.32    | 0.581   | 0.57   | 0.994    | 0.0726   |
| fig 6666666.474<br>865.peg.2618 | Biotin carboxyl carrier protein of acetyl-CoA carboxylase                                                 |      | 0.236   | 0.771 | -0.107  | 0.428   | 0.394   | 0.0751 | 0.66     | 0.0531   |
| fig 6666666.474<br>865.peg.969  | Choline dehydrogenase (EC 1.1.99.1)                                                                       |      | -0.0407 | 0.765 | -6.66   | -5.85   | 0.967   | 0.542  | 5.21E-07 | 2.92E-06 |
| fig 6666666.474<br>865.peg.1783 | Transcriptional repressor of the fructose operon, DeoR family                                             |      | 0.849   | 0.761 | -0.285  | -0.374  | 0.35    | 0.57   | 0.734    | 0.622    |
| fig 6666666.474<br>865.peg.2614 | Exodeoxyribonuclease VII large subunit (EC 3.1.11.6)                                                      |      | -1.36   | 0.753 | -0.257  | 1.86    | 0.109   | 0.538  | 0.745    | 0.0117   |
| fig 6666666.474<br>865.peg.2592 | Ribonuclease Z (EC 3.1.26.11)                                                                             |      | -0.102  | 0.752 | -0.847  | 0.00727 | 0.843   | 0.276  | 0.0254   | 0.987    |
| fig 6666666.474<br>865.peg.25   | NADPH-dependent glyceraldehyde-3-phosphate dehydrogenase (EC 1.2.1.13)                                    |      | -0.404  | 0.751 | -0.699  | 0.456   | 0.311   | 0.217  | 0.0325   | 0.154    |
| fig 6666666.474<br>865.peg.1872 | Clumping factor ClfA, fibrinogen-binding protein                                                          | clfA | 0.39    | 0.746 | -1.38   | -1.02   | 0.789   | 0.733  | 0.196    | 0.343    |
| fig 6666666.474<br>865.peg.2302 | Aluminum resistance protein                                                                               |      | -0.991  | 0.746 | -1.05   | 0.689   | 0.243   | 0.554  | 0.13     | 0.326    |
| fig 6666666.474<br>865.peg.1719 | FIG01107967: hypothetical protein                                                                         |      | 0.563   | 0.743 | 1.17    | 1.35    | 0.461   | 0.497  | 0.0518   | 0.0298   |
| fig 6666666.474<br>865.peg.1649 | hypothetical fig 282458.1.peg.581 homolog                                                                 |      | -0.162  | 0.737 | -0.342  | 0.557   | 0.911   | 0.703  | 0.762    | 0.571    |
| fig 6666666.474<br>865.peg.2491 | probable metal-dependent peptidase                                                                        |      | 0.767   | 0.725 | 2.04    | 1.99    | 0.0556  | 0.225  | 1.80E-05 | 3.53E-05 |
| fig 6666666.474<br>865.peg.1495 | Hypothetical transmembrane protein coupled to NADH-ubiquinone oxidoreductase chain 5 homolog              |      | 0.109   | 0.721 | -0.321  | 0.291   | 0.893   | 0.433  | 0.566    | 0.586    |
| fig 6666666.474<br>865.peg.2180 | Cell division protein FtsQ                                                                                |      | 0.15    | 0.71  | -1.54   | -0.981  | 0.915   | 0.708  | 0.0962   | 0.292    |
| fig 6666666.474<br>865.peg.1327 | FIG01108182: hypothetical protein                                                                         |      | -0.198  | 0.709 | -3.03   | -2.12   | 0.868   | 0.664  | 0.0016   | 0.0154   |
| fig 6666666.474<br>865.peg.2441 | Dihydrolipoamide succinyltransferase component (E2) of 2-oxoglutarate dehydrogenase complex (EC 2.3.1.61) |      | -0.131  | 0.702 | -1.07   | -0.241  | 0.678   | 0.122  | 0.000253 | 0.296    |
| fig 6666666.474<br>865.peg.1606 | Adhesin of unknown specificity SdrD                                                                       |      | 0.833   | 0.7   | 0.196   | 0.0634  | 0.445   | 0.691  | 0.846    | 0.941    |

|                                 |                                                                                                    |      |        |       |        |         |        |       |         |         |
|---------------------------------|----------------------------------------------------------------------------------------------------|------|--------|-------|--------|---------|--------|-------|---------|---------|
| fig/6666666.474<br>865.peg.767  | Nitrite reductase [NAD(P)H] large subunit (EC 1.7.1.4)                                             |      | -0.168 | 0.699 | -1.46  | -0.589  | 0.79   | 0.419 | 0.00473 | 0.2     |
| fig/6666666.474<br>865.peg.111  | 3,4-dihydroxy-2-butanone 4-phosphate synthase (EC 4.1.99.12) / GTP cyclohydrolase II (EC 3.5.4.25) |      | -0.406 | 0.691 | -0.455 | 0.642   | 0.252  | 0.217 | 0.116   | 0.0338  |
| fig/6666666.474<br>865.peg.2177 | Cell division protein FtsI [Peptidoglycan synthetase] (EC 2.4.1.129)                               | pbpA | 0.229  | 0.688 | 0.868  | 1.33    | 0.609  | 0.263 | 0.0135  | 0.00105 |
| fig/6666666.474<br>865.peg.489  | Hypothetical protein MW2050                                                                        |      | -0.619 | 0.688 | 0.0899 | 1.4     | 0.446  | 0.542 | 0.911   | 0.0332  |
| fig/6666666.474<br>865.peg.33   | Citrate synthase (si) (EC 2.3.3.1)                                                                 |      | 0.34   | 0.671 | 0.324  | 0.656   | 0.429  | 0.29  | 0.331   | 0.0529  |
| fig/6666666.474<br>865.peg.2054 | FmtA protein involved in methicillin resistance                                                    | fmtA | 0.635  | 0.663 | 1.98   | 2.01    | 0.321  | 0.479 | 0.00119 | 0.00127 |
| fig/6666666.474<br>865.peg.2709 | FIG01055109: hypothetical protein                                                                  |      | 0.016  | 0.66  | -0.481 | 0.163   | 0.963  | 0.106 | 0.0236  | 0.432   |
| fig/6666666.474<br>865.peg.1315 | Ribokinase (EC 2.7.1.15)                                                                           |      | 0.0869 | 0.654 | 0.033  | 0.6     | 0.926  | 0.543 | 0.962   | 0.324   |
| fig/6666666.474<br>865.peg.2273 | Transcriptional regulator in cluster with Zn-dependent hydrolase                                   |      | 0.378  | 0.652 | -0.222 | 0.0518  | 0.711  | 0.664 | 0.803   | 0.946   |
| fig/6666666.474<br>865.peg.2495 | 5-Enolpyruvylshikimate-3-phosphate synthase (EC 2.5.1.19)                                          |      | -0.471 | 0.651 | 0.113  | 1.24    | 0.281  | 0.335 | 0.787   | 0.00282 |
| fig/6666666.474<br>865.peg.2610 | DNA repair protein RecN                                                                            |      | -0.224 | 0.637 | 0.47   | 1.33    | 0.764  | 0.529 | 0.396   | 0.0209  |
| fig/6666666.474<br>865.peg.2198 | Carbamoyl-phosphate synthase small chain (EC 6.3.5.5)                                              |      | 0.156  | 0.636 | -0.574 | -0.0936 | 0.64   | 0.167 | 0.0214  | 0.718   |
| fig/6666666.474<br>865.peg.2625 | Glycine dehydrogenase [decarboxylating] (glycine cleavage system P2 protein) (EC 1.4.4.2)          |      | 0.0131 | 0.636 | -0.767 | -0.144  | 0.967  | 0.167 | 0.00409 | 0.562   |
| fig/6666666.474<br>865.peg.2423 | Aspartate-semialdehyde dehydrogenase (EC 1.2.1.11)                                                 |      | -0.466 | 0.634 | -1.54  | -0.441  | 0.475  | 0.497 | 0.00592 | 0.392   |
| fig/6666666.474<br>865.peg.612  | Hypoxanthine/guanine permease PbuG                                                                 |      | 1.11   | 0.633 | 1.92   | 1.45    | 0.118  | 0.539 | 0.00332 | 0.0174  |
| fig/6666666.474<br>865.peg.60   | D-3-phosphoglycerate dehydrogenase (EC 1.1.1.95)                                                   |      | -0.911 | 0.632 | 1.38   | 2.92    | 0.517  | 0.796 | 0.202   | 0.0123  |
| fig/6666666.474<br>865.peg.1528 | Signal peptidase-like protein                                                                      |      | -0.117 | 0.632 | -0.459 | 0.29    | 0.933  | 0.727 | 0.636   | 0.764   |
| fig/6666666.474<br>865.peg.715  | TetR family regulatory protein of MDR cluster                                                      |      | -0.525 | 0.629 | -0.231 | 0.923   | 0.591  | 0.665 | 0.787   | 0.203   |
| fig/6666666.474<br>865.peg.2621 | FIG01108536: hypothetical protein                                                                  |      | 0.609  | 0.628 | 0.0455 | 0.0651  | 0.251  | 0.432 | 0.931   | 0.89    |
| fig/6666666.474<br>865.peg.2683 | Hydrolase (HAD superfamily), YqeK                                                                  |      | -0.849 | 0.627 | -0.741 | 0.735   | 0.0456 | 0.323 | 0.0304  | 0.034   |
| fig/6666666.474<br>865.peg.669  | Histidinol-phosphatase [alternative form] (EC 3.1.3.15)                                            |      | 0.105  | 0.626 | 0.166  | 0.687   | 0.868  | 0.432 | 0.742   | 0.113   |
| fig/6666666.474<br>865.peg.101  | Predicted cell-wall-anchored protein SasC (LPXTG motif)                                            |      | -0.617 | 0.622 | -1.1   | 0.143   | 0.254  | 0.433 | 0.0182  | 0.767   |
| fig/6666666.474<br>865.peg.1021 | FIG01108094: hypothetical protein                                                                  |      | -0.567 | 0.622 | -1.21  | -0.0216 | 0.437  | 0.542 | 0.0364  | 0.973   |

|                                 |                                                                                                  |      |         |       |         |         |         |       |          |          |
|---------------------------------|--------------------------------------------------------------------------------------------------|------|---------|-------|---------|---------|---------|-------|----------|----------|
| fig 6666666.474<br>865.peg.2172 | Uncharacterized N-acetyltransferase BT9727_3663 (EC 2.3.1.-)                                     |      | 0.616   | 0.622 | 0.225   | 0.231   | 0.0619  | 0.217 | 0.396    | 0.388    |
| fig 6666666.474<br>865.peg.1082 | FIG002958: hypothetical protein                                                                  |      | 0.132   | 0.619 | -0.389  | 0.0985  | 0.773   | 0.323 | 0.237    | 0.784    |
| fig 6666666.474<br>865.peg.752  | Transcriptional regulator SarZ (Staphylococcal accessory regulator Z)                            | sarZ | -1.01   | 0.608 | 0.18    | 1.8     | 0.0658  | 0.437 | 0.723    | 0.000943 |
| fig 6666666.474<br>865.peg.1613 | Glucosamine-6-phosphate deaminase (EC 3.5.99.6)                                                  |      | -0.75   | 0.605 | 0.596   | 1.95    | 0.183   | 0.467 | 0.195    | 0.000712 |
| fig 6666666.474<br>865.peg.270  | Nicotinamidase (EC 3.5.1.19)                                                                     |      | -0.311  | 0.604 | 0.656   | 1.57    | 0.354   | 0.225 | 0.0198   | 6.13E-05 |
| fig 6666666.474<br>865.peg.929  | Immunodominant staphylococcal antigen A precursor                                                |      | 0.178   | 0.59  | -0.408  | 0.00331 | 0.658   | 0.29  | 0.162    | 0.991    |
| fig 6666666.474<br>865.peg.1102 | Virulence-associated cell-wall-anchored protein SasH (LPXTG motif); 5'-nucleotidase (EC 3.1.3.5) | sasH | -1.86   | 0.588 | -4.11   | -1.66   | 0.016   | 0.581 | 6.66E-06 | 0.0086   |
| fig 6666666.474<br>865.peg.1635 | Phosphomevalonate kinase (EC 2.7.4.2)                                                            |      | 0.184   | 0.583 | 0.859   | 1.26    | 0.643   | 0.281 | 0.00649  | 0.000562 |
| fig 6666666.474<br>865.peg.280  | FIG01107873: hypothetical protein                                                                |      | 0.392   | 0.581 | -0.172  | 0.0167  | 0.562   | 0.537 | 0.777    | 0.977    |
| fig 6666666.474<br>865.peg.2086 | Trk system potassium uptake protein TrkA                                                         |      | -2.05   | 0.576 | -0.2    | 2.42    | 0.00389 | 0.533 | 0.73     | 0.000263 |
| fig 6666666.474<br>865.peg.2295 | Glycerol kinase (EC 2.7.1.30)                                                                    |      | -0.189  | 0.574 | 0.894   | 1.66    | 0.73    | 0.433 | 0.0332   | 0.00105  |
| fig 6666666.474<br>865.peg.800  | FIG01107902: hypothetical protein                                                                |      | 1.45    | 0.572 | 3.79    | 2.91    | 0.0173  | 0.503 | 1.88E-06 | 3.53E-05 |
| fig 6666666.474<br>865.peg.1028 | Biofilm operon icaABCD HTH-type negative transcriptional regulator IcaR                          |      | -0.239  | 0.568 | -0.617  | 0.19    | 0.722   | 0.536 | 0.213    | 0.721    |
| fig 6666666.474<br>865.peg.678  | phosphoglycolate phosphatase                                                                     |      | -0.699  | 0.568 | -0.386  | 0.881   | 0.189   | 0.473 | 0.38     | 0.048    |
| fig 6666666.474<br>865.peg.2218 | Ribulose-phosphate 3-epimerase (EC 5.1.3.1)                                                      |      | 0.31    | 0.557 | 0.434   | 0.68    | 0.529   | 0.422 | 0.251    | 0.0732   |
| fig 6666666.474<br>865.peg.1449 | Nitroreductase family protein                                                                    |      | 0.323   | 0.556 | 0.307   | 0.54    | 0.243   | 0.204 | 0.175    | 0.0232   |
| fig 6666666.474<br>865.peg.2707 | FIG01108372: hypothetical protein                                                                |      | 0.189   | 0.556 | 0.176   | 0.543   | 0.658   | 0.339 | 0.601    | 0.0813   |
| fig 6666666.474<br>865.peg.398  | Response regulator of the competence regulon ComE                                                | agrA | -1.29   | 0.556 | -0.872  | 0.979   | 0.093   | 0.647 | 0.156    | 0.112    |
| fig 6666666.474<br>865.peg.1353 | Acid phosphatase (EC 3.1.3.2)                                                                    |      | 0.256   | 0.554 | -3.47   | -3.17   | 0.866   | 0.814 | 0.0031   | 0.0057   |
| fig 6666666.474<br>865.peg.224  | Monofunctional biosynthetic peptidoglycan transglycosylase (EC 2.4.2.-)                          | sgtB | 0.708   | 0.535 | 5.7     | 5.53    | 0.257   | 0.57  | 9.16E-08 | 2.50E-07 |
| fig 6666666.474<br>865.peg.1612 | FIG011895: hypothetical protein                                                                  |      | -0.011  | 0.535 | 0.578   | 1.12    | 0.988   | 0.699 | 0.391    | 0.0908   |
| fig 6666666.474<br>865.peg.2725 | GTP pyrophosphokinase (EC 2.7.6.5), (p)ppGpp synthetase I                                        | relA | -0.0229 | 0.535 | -0.0118 | 0.547   | 0.967   | 0.43  | 0.979    | 0.138    |
| fig 6666666.474<br>865.peg.2260 | DNA polymerase III alpha subunit (EC 2.7.7.7)                                                    |      | 0.87    | 0.533 | -0.109  | -0.446  | 0.199   | 0.608 | 0.869    | 0.426    |

|                                 |                                                                                                                        |  |        |       |        |         |        |       |          |          |
|---------------------------------|------------------------------------------------------------------------------------------------------------------------|--|--------|-------|--------|---------|--------|-------|----------|----------|
| fig/6666666.474<br>865.peg.2293 | Glycerol uptake operon antiterminator regulatory protein                                                               |  | -0.996 | 0.529 | -0.977 | 0.548   | 0.202  | 0.691 | 0.124    | 0.397    |
| fig/6666666.474<br>865.peg.233  | Ribonuclease BN (EC 3.1.-.-)                                                                                           |  | -0.231 | 0.528 | -0.819 | -0.0599 | 0.453  | 0.225 | 0.00285  | 0.826    |
| fig/6666666.474<br>865.peg.1615 | 6-phospho-3-hexuloisomerase                                                                                            |  | -0.784 | 0.527 | -0.254 | 1.06    | 0.251  | 0.621 | 0.689    | 0.0612   |
| fig/6666666.474<br>865.peg.2464 | Putative Staphylococcal surface anchored protein                                                                       |  | -0.775 | 0.527 | -0.511 | 0.791   | 0.658  | 0.861 | 0.73     | 0.552    |
| fig/6666666.474<br>865.peg.2201 | Orotate phosphoribosyltransferase (EC 2.4.2.10)                                                                        |  | 0.129  | 0.526 | -0.667 | -0.27   | 0.64   | 0.167 | 0.00336  | 0.174    |
| fig/6666666.474<br>865.peg.1595 | chaperone protein HchA                                                                                                 |  | -0.485 | 0.525 | -1.74  | -0.727  | 0.154  | 0.323 | 2.37E-05 | 0.0153   |
| fig/6666666.474<br>865.peg.2097 | Putrescine transport ATP-binding protein PotA (TC 3.A.1.11.1)                                                          |  | 0.179  | 0.52  | -0.056 | 0.285   | 0.842  | 0.694 | 0.945    | 0.676    |
| fig/6666666.474<br>865.peg.2144 | Succinate dehydrogenase flavoprotein subunit (EC 1.3.99.1)                                                             |  | -0.441 | 0.51  | -0.44  | 0.512   | 0.25   | 0.397 | 0.161    | 0.102    |
| fig/6666666.474<br>865.peg.480  | Peptide chain release factor 1                                                                                         |  | 0.136  | 0.506 | -0.383 | -0.013  | 0.667  | 0.225 | 0.0949   | 0.957    |
| fig/6666666.474<br>865.peg.1844 | Excinuclease ABC subunit A                                                                                             |  | -0.529 | 0.498 | -0.98  | 0.0463  | 0.0607 | 0.225 | 0.000428 | 0.859    |
| fig/6666666.474<br>865.peg.2667 | tRNA-t(6)A37 methyltransferase                                                                                         |  | 0.0114 | 0.492 | 0.0437 | 0.524   | 0.974  | 0.323 | 0.891    | 0.0506   |
| fig/6666666.474<br>865.peg.1707 | Bacitracin export ATP-binding protein BceA                                                                             |  | -0.53  | 0.49  | -0.673 | 0.347   | 0.15   | 0.397 | 0.0292   | 0.244    |
| fig/6666666.474<br>865.peg.2062 | Methylenetetrahydrofolate dehydrogenase (NADP+) (EC 1.5.1.5) /<br>Methenyltetrahydrofolate cyclohydrolase (EC 3.5.4.9) |  | -0.131 | 0.485 | -0.16  | 0.455   | 0.667  | 0.226 | 0.485    | 0.0445   |
| fig/6666666.474<br>865.peg.2228 | acyl carrier protein ACP                                                                                               |  | -0.515 | 0.485 | -1.41  | -0.41   | 0.125  | 0.339 | 9.99E-05 | 0.131    |
| fig/6666666.474<br>865.peg.1878 | Cold shock protein CspC                                                                                                |  | 0.493  | 0.484 | -0.917 | -0.926  | 0.211  | 0.419 | 0.00877  | 0.00883  |
| fig/6666666.474<br>865.peg.37   | Acetyl-coenzyme A carboxyl transferase alpha chain (EC 6.4.1.2)                                                        |  | 0.284  | 0.481 | 0.34   | 0.537   | 0.285  | 0.225 | 0.115    | 0.019    |
| fig/6666666.474<br>865.peg.2704 | peptidase, U32 family large subunit [C1]                                                                               |  | -0.293 | 0.48  | 0.161  | 0.934   | 0.677  | 0.621 | 0.789    | 0.0695   |
| fig/6666666.474<br>865.peg.2079 | LSU m5C1962 methyltransferase Rlml                                                                                     |  | 0.0503 | 0.477 | 0.618  | 1.04    | 0.906  | 0.369 | 0.0297   | 0.00165  |
| fig/6666666.474<br>865.peg.1767 | Undecaprenyl-diphosphatase (EC 3.6.1.27)                                                                               |  | 0.867  | 0.475 | 3.25   | 2.86    | 0.238  | 0.699 | 7.82E-05 | 0.000305 |
| fig/6666666.474<br>865.peg.1149 | tRNA dihydrouridine synthase B (EC 1.-.-.-)                                                                            |  | -0.552 | 0.475 | -0.982 | 0.0453  | 0.594  | 0.774 | 0.202    | 0.955    |
| fig/6666666.474<br>865.peg.1857 | Central glycolytic genes regulator                                                                                     |  | 0.0302 | 0.466 | -0.555 | -0.119  | 0.963  | 0.525 | 0.161    | 0.783    |
| fig/6666666.474<br>865.peg.2134 | Phenylalanyl-tRNA synthetase alpha chain (EC 6.1.1.20)                                                                 |  | -0.163 | 0.465 | -0.781 | -0.153  | 0.726  | 0.458 | 0.0282   | 0.677    |
| fig/6666666.474<br>865.peg.1920 | Glyoxylate reductase (EC 1.1.1.79) / Glyoxylate reductase (EC 1.1.1.26)<br>/ Hydroxypyruvate reductase (EC 1.1.1.81)   |  | 0.0374 | 0.462 | 1.25   | 1.67    | 0.981  | 0.879 | 0.301    | 0.164    |

|                                 |                                                                                          |      |         |       |        |         |        |       |          |          |
|---------------------------------|------------------------------------------------------------------------------------------|------|---------|-------|--------|---------|--------|-------|----------|----------|
| fig/6666666.474<br>865.peg.1195 | Phosphonate ABC transporter phosphate-binding periplasmic component (TC 3.A.1.9.1)       |      | -0.511  | 0.461 | -0.858 | 0.114   | 0.691  | 0.831 | 0.375    | 0.913    |
| fig/6666666.474<br>865.peg.1680 | Manganese ABC transporter, ATP-binding protein SitB                                      |      | -1.1    | 0.459 | -2.29  | -0.729  | 0.0967 | 0.664 | 0.000482 | 0.167    |
| fig/6666666.474<br>865.peg.970  | Betaine aldehyde dehydrogenase (EC 1.2.1.8)                                              |      | -3.29   | 0.459 | -10.7  | -6.95   | 0.0346 | 0.882 | 1.16E-06 | 7.30E-05 |
| fig/6666666.474<br>865.peg.1050 | FIG01108092: hypothetical protein                                                        |      | -0.481  | 0.458 | -2.71  | -1.77   | 0.658  | 0.799 | 0.00285  | 0.0319   |
| fig/6666666.474<br>865.peg.1998 | Adenylate cyclase                                                                        |      | -0.14   | 0.449 | 1.54   | 2.13    | 0.871  | 0.708 | 0.0148   | 0.00233  |
| fig/6666666.474<br>865.peg.69   | Formate--tetrahydrofolate ligase (EC 6.3.4.3)                                            |      | -0.264  | 0.448 | -0.737 | -0.0253 | 0.322  | 0.263 | 0.00277  | 0.914    |
| fig/6666666.474<br>865.peg.1690 | Lipid A export ATP-binding/permease protein MsbA                                         | abcA | -0.494  | 0.444 | 0.903  | 1.84    | 0.15   | 0.399 | 0.00409  | 2.67E-05 |
| fig/6666666.474<br>865.peg.2424 | 4-hydroxy-tetrahydrodipicolinate synthase (EC 4.3.3.7)                                   |      | 1.3     | 0.444 | 0.0632 | -0.791  | 0.15   | 0.781 | 0.947    | 0.286    |
| fig/6666666.474<br>865.peg.2682 | Ribosomal silencing factor RsfA (former Iojap)                                           |      | 0.255   | 0.444 | 0.0452 | 0.234   | 0.303  | 0.225 | 0.849    | 0.235    |
| fig/6666666.474<br>865.peg.2185 | FIG001960: FtsZ-interacting protein related to cell division                             |      | 0.845   | 0.438 | 0.455  | 0.0485  | 0.0244 | 0.419 | 0.115    | 0.884    |
| fig/6666666.474<br>865.peg.2349 | Cardiolipin synthetase (EC 2.7.8.-)                                                      |      | 0.254   | 0.432 | 0.451  | 0.63    | 0.489  | 0.419 | 0.113    | 0.0338   |
| fig/6666666.474<br>865.peg.1604 | Predicted flavoprotein                                                                   |      | -0.291  | 0.431 | 0.0156 | 0.737   | 0.324  | 0.338 | 0.957    | 0.00551  |
| fig/6666666.474<br>865.peg.108  | Lysophospholipase (EC 3.1.1.5); Monoglyceride lipase (EC 3.1.1.23); putative             |      | -0.48   | 0.429 | 0.952  | 1.86    | 0.221  | 0.458 | 0.00671  | 6.13E-05 |
| fig/6666666.474<br>865.peg.507  | oxidoreductase ylbE                                                                      |      | -0.527  | 0.429 | -0.706 | 0.25    | 0.324  | 0.592 | 0.1      | 0.572    |
| fig/6666666.474<br>865.peg.695  | Formiminoglutamase (EC 3.5.3.8)                                                          |      | 0.317   | 0.422 | -0.643 | -0.537  | 0.703  | 0.744 | 0.298    | 0.391    |
| fig/6666666.474<br>865.peg.2203 | FIG01107914: hypothetical protein                                                        |      | 0.33    | 0.419 | 0.396  | 0.486   | 0.777  | 0.827 | 0.676    | 0.579    |
| fig/6666666.474<br>865.peg.822  | M42 glutamyl aminopeptidase, cellulase                                                   |      | -0.0086 | 0.419 | 0.0709 | 0.498   | 0.984  | 0.538 | 0.874    | 0.184    |
| fig/6666666.474<br>865.peg.452  | Thiamin-phosphate pyrophosphorylase (EC 2.5.1.3)                                         |      | -0.386  | 0.413 | 0.0695 | 0.868   | 0.251  | 0.419 | 0.832    | 0.00502  |
| fig/6666666.474<br>865.peg.2040 | 2-succinyl-5-enolpyruvyl-6-hydroxy-3-cyclohexene-1-carboxylic-acid synthase (EC 2.2.1.9) |      | -2.39   | 0.408 | -1.93  | 0.871   | 0.016  | 0.811 | 0.015    | 0.239    |
| fig/6666666.474<br>865.peg.2612 | (2E,6E)-farnesyl diphosphate synthase (EC 2.5.1.10)                                      |      | 0.123   | 0.401 | -0.302 | -0.0251 | 0.691  | 0.355 | 0.183    | 0.918    |
| fig/6666666.474<br>865.peg.1507 | Autolysin precursor                                                                      | sle1 | 0.748   | 0.398 | -2.02  | -2.37   | 0.402  | 0.803 | 0.00798  | 0.00331  |
| fig/6666666.474<br>865.peg.2214 | Ribosomal RNA large subunit methyltransferase N (EC 2.1.1.-)                             |      | 0.489   | 0.398 | 0.422  | 0.331   | 0.15   | 0.432 | 0.126    | 0.227    |
| fig/6666666.474<br>865.peg.230  | Hypothetical protein YfkK                                                                |      | -0.977  | 0.397 | -3.19  | -1.81   | 0.0456 | 0.581 | 1.88E-06 | 0.000354 |

|                                 |                                                                                                                                            |      |          |       |        |         |        |       |          |          |
|---------------------------------|--------------------------------------------------------------------------------------------------------------------------------------------|------|----------|-------|--------|---------|--------|-------|----------|----------|
| fig/6666666.474<br>865.peg.2642 | Cell division protein FtsI [Peptidoglycan synthetase] (EC 2.4.1.129) /<br>Transpeptidase, Penicillin binding protein transpeptidase domain | pbp3 | 0.0757   | 0.397 | -0.153 | 0.168   | 0.789  | 0.323 | 0.473    | 0.422    |
| fig/6666666.474<br>865.peg.1684 | Teichoic acid export ATP-binding protein TagH (EC 3.6.3.40)                                                                                |      | -0.152   | 0.396 | -0.422 | 0.126   | 0.674  | 0.419 | 0.108    | 0.648    |
| fig/6666666.474<br>865.peg.519  | PTS system, mannitol-specific IIA component                                                                                                |      | -0.415   | 0.396 | -0.126 | 0.685   | 0.351  | 0.538 | 0.765    | 0.0578   |
| fig/6666666.474<br>865.peg.654  | Hypothetical protein SAV2296                                                                                                               |      | -0.664   | 0.396 | 0.0278 | 1.09    | 0.39   | 0.77  | 0.967    | 0.0756   |
| fig/6666666.474<br>865.peg.803  | FIG01107870: hypothetical protein                                                                                                          |      | -0.00842 | 0.39  | 0.192  | 0.59    | 0.984  | 0.536 | 0.604    | 0.0845   |
| fig/6666666.474<br>865.peg.2200 | Orotidine 5'-phosphate decarboxylase (EC 4.1.1.23)                                                                                         |      | -0.327   | 0.386 | -0.752 | -0.0385 | 0.258  | 0.397 | 0.00467  | 0.885    |
| fig/6666666.474<br>865.peg.9    | Porphobilinogen deaminase (EC 2.5.1.61)                                                                                                    |      | 0.326    | 0.386 | -0.48  | -0.42   | 0.109  | 0.217 | 0.00746  | 0.0164   |
| fig/6666666.474<br>865.peg.1508 | FIG01108237: hypothetical protein                                                                                                          |      | -0.368   | 0.385 | 0.484  | 1.24    | 0.229  | 0.417 | 0.0539   | 0.000225 |
| fig/6666666.474<br>865.peg.1924 | D-alanine--poly(phosphoribitol) ligase subunit 2 (EC 6.1.1.13)                                                                             |      | -0.165   | 0.383 | -0.79  | -0.242  | 0.693  | 0.506 | 0.016    | 0.443    |
| fig/6666666.474<br>865.peg.766  | Nitrite reductase [NAD(P)H] small subunit (EC 1.7.1.4)                                                                                     |      | 0.0231   | 0.382 | -2.53  | -2.17   | 0.974  | 0.716 | 0.000198 | 0.000919 |
| fig/6666666.474<br>865.peg.2052 | FIG01108206: hypothetical protein                                                                                                          |      | 0.259    | 0.381 | 2.13   | 2.25    | 0.812  | 0.831 | 0.0117   | 0.00901  |
| fig/6666666.474<br>865.peg.386  | Hypothetical SAV2027 homolog in superantigen-encoding<br>pathogenicity islands SaPI                                                        |      | -1.74    | 0.379 | -2.45  | -0.33   | 0.0304 | 0.78  | 0.00113  | 0.615    |
| fig/6666666.474<br>865.peg.1796 | 6-carboxytetrahydropterin synthase (EC 4.1.2.50) @ Queuosine<br>biosynthesis QueD, PTPS-I                                                  |      | 0.627    | 0.378 | -0.209 | -0.459  | 0.0723 | 0.458 | 0.469    | 0.101    |
| fig/6666666.474<br>865.peg.2080 | FIG01108691: hypothetical protein                                                                                                          |      | -0.479   | 0.375 | -0.817 | 0.0372  | 0.125  | 0.422 | 0.00407  | 0.891    |
| fig/6666666.474<br>865.peg.809  | Hypothetical protein, similar to glucose epimerase                                                                                         |      | -0.043   | 0.374 | 0.429  | 0.845   | 0.952  | 0.621 | 0.28     | 0.039    |
| fig/6666666.474<br>865.peg.200  | Fumarate hydratase class II (EC 4.2.1.2)                                                                                                   |      | -0.682   | 0.371 | -0.952 | 0.102   | 0.191  | 0.664 | 0.0302   | 0.834    |
| fig/6666666.474<br>865.peg.2431 | Cold shock protein CspA                                                                                                                    |      | 0.0962   | 0.369 | -0.814 | -0.542  | 0.658  | 0.217 | 9.93E-05 | 0.00288  |
| fig/6666666.474<br>865.peg.442  | UDP-N-acetylmuramoylalanyl-D-glutamyl-2,6-diaminopimelate--D-<br>alanyl-D-alanine ligase (EC 6.3.2.10)                                     |      | 0.0281   | 0.368 | 0.716  | 1.06    | 0.893  | 0.167 | 9.60E-05 | 6.21E-06 |
| fig/6666666.474<br>865.peg.1898 | Methionine ABC transporter ATP-binding protein                                                                                             |      | 0.171    | 0.367 | -0.346 | -0.15   | 0.728  | 0.595 | 0.356    | 0.707    |
| fig/6666666.474<br>865.peg.1915 | Lipoate synthase                                                                                                                           |      | 0.476    | 0.357 | -0.454 | -0.573  | 0.342  | 0.653 | 0.258    | 0.154    |
| fig/6666666.474<br>865.peg.1828 | Tripeptide aminopeptidase (EC 3.4.11.4)                                                                                                    |      | -0.725   | 0.352 | -0.368 | 0.709   | 0.453  | 0.841 | 0.66     | 0.351    |
| fig/6666666.474<br>865.peg.1928 | NADH dehydrogenase (EC 1.6.99.3)                                                                                                           |      | 0.343    | 0.35  | -0.529 | -0.521  | 0.222  | 0.419 | 0.0255   | 0.0296   |
| fig/6666666.474<br>865.peg.550  | Putative oxidoreductase YncB                                                                                                               |      | -0.0411  | 0.348 | -0.21  | 0.179   | 0.901  | 0.399 | 0.332    | 0.418    |

|                                 |                                                                                |      |         |       |         |        |        |       |          |          |
|---------------------------------|--------------------------------------------------------------------------------|------|---------|-------|---------|--------|--------|-------|----------|----------|
| fig 6666666.474<br>865.peg.958  | 2-dehydropantoate 2-reductase (EC 1.1.1.169)                                   |      | -0.103  | 0.348 | 0.773   | 1.22   | 0.832  | 0.586 | 0.0285   | 0.00233  |
| fig 6666666.474<br>865.peg.2426 | 2,3,4,5-tetrahydropyridine-2,6-dicarboxylate N-acetyltransferase (EC 2.3.1.89) |      | 0.888   | 0.346 | -0.87   | -1.41  | 0.423  | 0.864 | 0.31     | 0.101    |
| fig 6666666.474<br>865.peg.496  | HmrA protein involved in methicillin resistance / amidohydrolase of M40 family |      | -0.247  | 0.345 | 0.2     | 0.792  | 0.562  | 0.559 | 0.567    | 0.0203   |
| fig 6666666.474<br>865.peg.1597 | L-threonine 3-dehydrogenase (EC 1.1.1.103)                                     |      | -0.501  | 0.342 | -0.492  | 0.352  | 0.118  | 0.467 | 0.0608   | 0.175    |
| fig 6666666.474<br>865.peg.2241 | Succinyl-CoA ligase [ADP-forming] beta chain (EC 6.2.1.5)                      |      | 0.0866  | 0.339 | -0.103  | 0.149  | 0.721  | 0.323 | 0.592    | 0.409    |
| fig 6666666.474<br>865.peg.2733 | Holliday junction DNA helicase RuvA                                            |      | -0.344  | 0.338 | -0.0378 | 0.645  | 0.732  | 0.851 | 0.964    | 0.404    |
| fig 6666666.474<br>865.peg.2455 | hypothetical protein                                                           |      | -0.287  | 0.337 | -0.0452 | 0.578  | 0.27   | 0.399 | 0.859    | 0.0118   |
| fig 6666666.474<br>865.peg.461  | 3-hydroxyacyl-[acyl-carrier-protein] dehydratase, FabZ form (EC 4.2.1.59)      |      | -0.0248 | 0.337 | 0.944   | 1.31   | 0.962  | 0.529 | 0.00398  | 0.000473 |
| fig 6666666.474<br>865.peg.2065 | Phosphoribosylaminoimidazole-succinocarboxamide synthase (EC 6.3.2.6)          |      | -0.0147 | 0.335 | -0.497  | -0.148 | 0.963  | 0.339 | 0.0124   | 0.432    |
| fig 6666666.474<br>865.peg.1833 | FIG000605: protein co-occurring with transport systems (COG1739)               |      | 0.455   | 0.334 | 0.248   | 0.127  | 0.643  | 0.841 | 0.768    | 0.875    |
| fig 6666666.474<br>865.peg.2715 | Flavin-utilizing monooxygenase                                                 |      | 0.19    | 0.334 | -0.351  | -0.206 | 0.907  | 0.906 | 0.78     | 0.868    |
| fig 6666666.474<br>865.peg.1200 | Alcohol dehydrogenase (EC 1.1.1.1); Acetaldehyde dehydrogenase (EC 1.2.1.10)   | adhE | 1.76    | 0.331 | 0.227   | -1.2   | 0.0137 | 0.774 | 0.708    | 0.0296   |
| fig 6666666.474<br>865.peg.2047 | N-acetyl-L,L-diaminopimelate aminotransferase (EC 2.6.1.-)                     |      | -0.44   | 0.329 | -0.987  | -0.218 | 0.657  | 0.842 | 0.164    | 0.777    |
| fig 6666666.474<br>865.peg.1095 | Prophage LambdaSa2, replicative DNA helicase                                   |      | -0.349  | 0.328 | -0.444  | 0.232  | 0.719  | 0.844 | 0.565    | 0.766    |
| fig 6666666.474<br>865.peg.1779 | FIG01108024: hypothetical protein                                              |      | -0.0972 | 0.328 | -0.711  | -0.285 | 0.909  | 0.796 | 0.207    | 0.627    |
| fig 6666666.474<br>865.peg.32   | Isocitrate dehydrogenase [NADP] (EC 1.1.1.42)                                  |      | -0.102  | 0.323 | -0.0245 | 0.4    | 0.704  | 0.399 | 0.921    | 0.0494   |
| fig 6666666.474<br>865.peg.2605 | FIG01226417: hypothetical protein                                              |      | 0.0989  | 0.321 | -0.568  | -0.346 | 0.691  | 0.364 | 0.00549  | 0.0632   |
| fig 6666666.474<br>865.peg.362  | Acetylmithine deacetylase (EC 3.5.1.16)                                        |      | -0.427  | 0.321 | -0.195  | 0.553  | 0.627  | 0.826 | 0.797    | 0.394    |
| fig 6666666.474<br>865.peg.2498 | Nucleoside diphosphate kinase (EC 2.7.4.6)                                     |      | 0.396   | 0.316 | -0.847  | -0.928 | 0.15   | 0.433 | 0.0015   | 0.000943 |
| fig 6666666.474<br>865.peg.2197 | Dihydroorotase (EC 3.5.2.3)                                                    |      | -0.139  | 0.315 | -0.84   | -0.386 | 0.564  | 0.369 | 0.000297 | 0.0405   |
| fig 6666666.474<br>865.peg.1634 | Diphosphomevalonate decarboxylase (EC 4.1.1.33)                                |      | -0.337  | 0.314 | -0.0664 | 0.584  | 0.514  | 0.699 | 0.891    | 0.141    |
| fig 6666666.474<br>865.peg.659  | D-octopine dehydrogenase                                                       |      | -0.342  | 0.314 | -0.273  | 0.383  | 0.0645 | 0.247 | 0.0646   | 0.0152   |
| fig 6666666.474<br>865.peg.1120 | Cassette chromosome recombinase A                                              |      | -0.275  | 0.313 | -0.854  | -0.266 | 0.772  | 0.845 | 0.213    | 0.72     |

|                                 |                                                                                                                                                                                |      |         |       |         |         |          |       |          |         |
|---------------------------------|--------------------------------------------------------------------------------------------------------------------------------------------------------------------------------|------|---------|-------|---------|---------|----------|-------|----------|---------|
| fig/6666666.474<br>865.peg.1238 | Nicotinamidase/isochorismatase family protein                                                                                                                                  |      | -0.896  | 0.311 | -0.343  | 0.864   | 0.0259   | 0.596 | 0.277    | 0.0115  |
| fig/6666666.474<br>865.peg.221  | Teichoic acid export ATP-binding protein TagH (EC 3.6.3.40)                                                                                                                    |      | -0.937  | 0.31  | 0.153   | 1.4     | 0.128    | 0.774 | 0.796    | 0.00997 |
| fig/6666666.474<br>865.peg.684  | Hypothetical protein SAV2325                                                                                                                                                   |      | -1.23   | 0.309 | -1.22   | 0.312   | 0.259    | 0.898 | 0.17     | 0.749   |
| fig/6666666.474<br>865.peg.486  | Transcriptional regulator, HxlR family                                                                                                                                         |      | 1.65    | 0.307 | 1.92    | 0.582   | 0.000242 | 0.537 | 7.58E-06 | 0.0392  |
| fig/6666666.474<br>865.peg.898  | PTS system, glucose-specific IIC component (EC 2.7.1.69) / PTS system, glucose-specific IIB component (EC 2.7.1.69) / PTS system, glucose-specific IIA component (EC 2.7.1.69) |      | -0.79   | 0.305 | -0.508  | 0.587   | 0.118    | 0.708 | 0.215    | 0.151   |
| fig/6666666.474<br>865.peg.1926 | NifU-like domain protein                                                                                                                                                       |      | 0.817   | 0.301 | -0.101  | -0.617  | 0.0117   | 0.497 | 0.714    | 0.0158  |
| fig/6666666.474<br>865.peg.2735 | GTP-binding protein Obg                                                                                                                                                        |      | 0.0966  | 0.301 | -0.265  | -0.0612 | 0.658    | 0.323 | 0.0949   | 0.721   |
| fig/6666666.474<br>865.peg.1584 | LSU ribosomal protein L7/L12 (P1/P2)                                                                                                                                           |      | 0.426   | 0.3   | -0.154  | -0.281  | 0.0456   | 0.339 | 0.364    | 0.0947  |
| fig/6666666.474<br>865.peg.949  | Dihydroorotate dehydrogenase (EC 1.3.3.1)                                                                                                                                      |      | -0.605  | 0.3   | -0.822  | 0.0833  | 0.0723   | 0.538 | 0.00584  | 0.777   |
| fig/6666666.474<br>865.peg.845  | Short-chain dehydrogenase/reductase SDR                                                                                                                                        |      | -0.172  | 0.299 | -0.123  | 0.348   | 0.502    | 0.419 | 0.566    | 0.0804  |
| fig/6666666.474<br>865.peg.256  | ATP-dependent DNA helicase UvrD/PcrA                                                                                                                                           |      | 0.0864  | 0.298 | 0.113   | 0.324   | 0.728    | 0.399 | 0.577    | 0.0829  |
| fig/6666666.474<br>865.peg.2067 | Phosphoribosylformylglycinamide synthase, glutamine amidotransferase subunit (EC 6.3.5.3)                                                                                      |      | -0.248  | 0.297 | -1.03   | -0.49   | 0.468    | 0.537 | 0.00113  | 0.0676  |
| fig/6666666.474<br>865.peg.229  | Aminopeptidase S (Leu, Val, Phe, Tyr preference) (EC 3.4.11.24)                                                                                                                |      | -0.102  | 0.297 | 0.0964  | 0.496   | 0.643    | 0.323 | 0.577    | 0.00555 |
| fig/6666666.474<br>865.peg.2497 | Chorismate synthase (EC 4.2.3.5)                                                                                                                                               |      | 0.0642  | 0.296 | -0.0926 | 0.14    | 0.901    | 0.664 | 0.822    | 0.703   |
| fig/6666666.474<br>865.peg.2626 | Glycine dehydrogenase [decarboxylating] (glycine cleavage system P1 protein) (EC 1.4.4.2)                                                                                      |      | 0.456   | 0.293 | -0.553  | -0.716  | 0.0669   | 0.422 | 0.01     | 0.00225 |
| fig/6666666.474<br>865.peg.1395 | FIG01108269: hypothetical protein                                                                                                                                              |      | 0.187   | 0.291 | 1.01    | 1.12    | 0.85     | 0.861 | 0.146    | 0.11    |
| fig/6666666.474<br>865.peg.2653 | ATP/GTP-binding protein, SA1392 homolog                                                                                                                                        |      | 0.14    | 0.29  | 0.422   | 0.573   | 0.85     | 0.806 | 0.427    | 0.268   |
| fig/6666666.474<br>865.peg.1817 | Ribonucleotide reductase of class Ib (aerobic), beta subunit (EC 1.17.4.1)                                                                                                     |      | -0.472  | 0.289 | -0.636  | 0.125   | 0.0344   | 0.389 | 0.00185  | 0.485   |
| fig/6666666.474<br>865.peg.2015 | UDP-N-acetylmuramoylalanyl-D-glutamate--L-lysine ligase (EC 6.3.2.7)                                                                                                           | murE | -0.0387 | 0.289 | 0.359   | 0.687   | 0.926    | 0.539 | 0.17     | 0.0146  |
| fig/6666666.474<br>865.peg.399  | Fructokinase (EC 2.7.1.4)                                                                                                                                                      |      | 0.162   | 0.288 | 0.0914  | 0.217   | 0.792    | 0.773 | 0.865    | 0.648   |
| fig/6666666.474<br>865.peg.425  | RNA polymerase sigma factor SigB                                                                                                                                               |      | 0.516   | 0.288 | -0.782  | -1.01   | 0.715    | 0.918 | 0.465    | 0.335   |
| fig/6666666.474<br>865.peg.491  | DNA-directed RNA polymerase delta subunit (EC 2.7.7.6)                                                                                                                         |      | 0.293   | 0.285 | -0.158  | -0.166  | 0.238    | 0.433 | 0.448    | 0.419   |



|                                 |                                                                                                               |      |        |       |         |         |          |       |          |          |
|---------------------------------|---------------------------------------------------------------------------------------------------------------|------|--------|-------|---------|---------|----------|-------|----------|----------|
| fig/6666666.474<br>865.peg.1645 | Oxidoreductase ion channel                                                                                    |      | -0.118 | 0.282 | -0.19   | 0.21    | 0.812    | 0.699 | 0.628    | 0.571    |
| fig/6666666.474<br>865.peg.700  | Aldose 1-epimerase (EC 5.1.3.3)                                                                               |      | -1.33  | 0.281 | -0.924  | 0.689   | 0.225    | 0.906 | 0.301    | 0.447    |
| fig/6666666.474<br>865.peg.2199 | Carbamoyl-phosphate synthase large chain (EC 6.3.5.5)                                                         |      | -0.148 | 0.279 | -1.04   | -0.616  | 0.469    | 0.356 | 1.47E-05 | 0.00135  |
| fig/6666666.474<br>865.peg.283  | ABC transporter ATP-binding protein                                                                           |      | -0.526 | 0.279 | -0.071  | 0.734   | 0.0788   | 0.529 | 0.803    | 0.00614  |
| fig/6666666.474<br>865.peg.2155 | FIG01108519: hypothetical protein                                                                             |      | -1.15  | 0.278 | -0.101  | 1.33    | 0.518    | 0.943 | 0.955    | 0.338    |
| fig/6666666.474<br>865.peg.2263 | COG2740: Predicted nucleic-acid-binding protein implicated in transcription termination                       |      | -0.184 | 0.277 | -1.28   | -0.824  | 0.843    | 0.861 | 0.0538   | 0.208    |
| fig/6666666.474<br>865.peg.2661 | Phosphate starvation-inducible protein PhoH, predicted ATPase                                                 |      | -0.219 | 0.276 | 0.345   | 0.84    | 0.243    | 0.339 | 0.0292   | 0.000107 |
| fig/6666666.474<br>865.peg.469  | ATP synthase B chain (EC 3.6.3.14)                                                                            |      | -0.21  | 0.276 | -1.04   | -0.552  | 0.232    | 0.323 | 6.05E-06 | 0.00139  |
| fig/6666666.474<br>865.peg.19   | Translation initiation factor 3                                                                               | infC | 0.802  | 0.273 | -0.543  | -1.07   | 0.0137   | 0.537 | 0.0293   | 0.000552 |
| fig/6666666.474<br>865.peg.1633 | Mevalonate kinase (EC 2.7.1.36)                                                                               |      | 0.0948 | 0.272 | 0.35    | 0.527   | 0.926    | 0.861 | 0.628    | 0.428    |
| fig/6666666.474<br>865.peg.180  | Protoporphyrinogen IX oxidase, aerobic, HemY (EC 1.3.3.4)                                                     |      | -0.181 | 0.269 | -0.0958 | 0.354   | 0.781    | 0.803 | 0.865    | 0.464    |
| fig/6666666.474<br>865.peg.409  | TsaD/Kae1/Qri7 protein, required for threonylcarbamoyladenosine t(6)A37 formation in tRNA                     |      | 0.477  | 0.267 | -0.135  | -0.345  | 0.594    | 0.864 | 0.865    | 0.621    |
| fig/6666666.474<br>865.peg.952  | PhnB protein; putative DNA binding 3-demethylubiquinone-9 3-methyltransferase domain protein                  |      | 0.363  | 0.265 | 1.18    | 1.08    | 0.116    | 0.432 | 1.92E-05 | 6.13E-05 |
| fig/6666666.474<br>865.peg.2207 | Phosphopantothenoylcysteine decarboxylase (EC 4.1.1.36) / Phosphopantothenoylcysteine synthetase (EC 6.3.2.5) |      | 0.0737 | 0.263 | -0.307  | -0.118  | 0.781    | 0.458 | 0.112    | 0.56     |
| fig/6666666.474<br>865.peg.2579 | Osmosensitive K <sup>+</sup> channel histidine kinase KdpD (EC 2.7.3.-)                                       |      | -0.596 | 0.263 | -0.188  | 0.671   | 0.247    | 0.774 | 0.695    | 0.112    |
| fig/6666666.474<br>865.peg.853  | Mutator mutT protein (7,8-dihydro-8-oxoguanine-triphosphatase) (EC 3.6.1.-)                                   |      | -0.768 | 0.261 | -0.965  | 0.0629  | 0.0197   | 0.574 | 0.00125  | 0.826    |
| fig/6666666.474<br>865.peg.187  | Hypothetical protein SAV1839                                                                                  |      | -0.231 | 0.259 | -1.18   | -0.69   | 0.449    | 0.542 | 0.000144 | 0.00811  |
| fig/6666666.474<br>865.peg.815  | Osmotically activated L-carnitine/choline ABC transporter, ATP-binding protein OpuCA                          |      | -1.42  | 0.257 | -1.78   | -0.108  | 0.0258   | 0.82  | 0.00206  | 0.848    |
| fig/6666666.474<br>865.peg.2675 | Translation elongation factor LepA                                                                            |      | 0.122  | 0.256 | -0.0409 | 0.0926  | 0.521    | 0.364 | 0.817    | 0.544    |
| fig/6666666.474<br>865.peg.2503 | Glycerol-3-phosphate dehydrogenase [NAD(P) <sup>+</sup> ] (EC 1.1.1.94)                                       |      | -0.169 | 0.255 | -0.152  | 0.271   | 0.555    | 0.529 | 0.508    | 0.212    |
| fig/6666666.474<br>865.peg.2193 | Ribosomal large subunit pseudouridine synthase D (EC 4.2.1.70)                                                |      | 1.01   | 0.254 | -0.0448 | -0.801  | 0.000966 | 0.48  | 0.849    | 0.00103  |
| fig/6666666.474<br>865.peg.1614 | D-arabino-3-hexulose 6-phosphate formaldehyde lyase                                                           |      | 0.0357 | 0.253 | -0.262  | -0.0452 | 0.909    | 0.506 | 0.202    | 0.847    |
| fig/6666666.474<br>865.peg.1943 | FIG01107890: hypothetical protein                                                                             |      | -0.065 | 0.248 | -0.181  | 0.132   | 0.832    | 0.536 | 0.415    | 0.562    |

|                                 |                                                                                                               |  |         |       |         |         |         |       |          |          |
|---------------------------------|---------------------------------------------------------------------------------------------------------------|--|---------|-------|---------|---------|---------|-------|----------|----------|
| fig/6666666.474<br>865.peg.520  | Mannitol-1-phosphate 5-dehydrogenase (EC 1.1.1.17)                                                            |  | -0.832  | 0.247 | -0.74   | 0.34    | 0.0265  | 0.683 | 0.0169   | 0.244    |
| fig/6666666.474<br>865.peg.1558 | Dihydropteroate synthase (EC 2.5.1.15)                                                                        |  | -0.225  | 0.246 | -0.338  | 0.133   | 0.382   | 0.513 | 0.0957   | 0.526    |
| fig/6666666.474<br>865.peg.1576 | 23S rRNA (guanosine-2'-O-) -methyltransferase rlmB (EC 2.1.1.-)                                               |  | 0.569   | 0.246 | 0.0517  | -0.272  | 0.00341 | 0.339 | 0.745    | 0.0504   |
| fig/6666666.474<br>865.peg.36   | 6-phosphofructokinase (EC 2.7.1.11)                                                                           |  | 0.103   | 0.243 | 0.025   | 0.165   | 0.678   | 0.458 | 0.915    | 0.373    |
| fig/6666666.474<br>865.peg.858  | UTP--glucose-1-phosphate uridylyltransferase (EC 2.7.7.9)                                                     |  | -0.326  | 0.243 | -1.14   | -0.567  | 0.15    | 0.467 | 2.60E-05 | 0.00612  |
| fig/6666666.474<br>865.peg.2231 | Signal recognition particle receptor protein FtsY (=alpha subunit) (TC 3.A.5.1.1)                             |  | -0.106  | 0.241 | -0.2    | 0.147   | 0.685   | 0.495 | 0.296    | 0.447    |
| fig/6666666.474<br>865.peg.1304 | Glycosyl transferase family protein, putative                                                                 |  | 0.118   | 0.24  | 0.655   | 0.777   | 0.529   | 0.389 | 0.000317 | 0.000117 |
| fig/6666666.474<br>865.peg.1077 | GTPase and tRNA-U34 5-formylation enzyme TrmE                                                                 |  | -0.145  | 0.239 | 0.0186  | 0.402   | 0.646   | 0.571 | 0.95     | 0.0801   |
| fig/6666666.474<br>865.peg.1946 | Putative NADH-dependent flavin oxidoreductase                                                                 |  | -0.33   | 0.238 | -0.0746 | 0.494   | 0.137   | 0.462 | 0.72     | 0.0114   |
| fig/6666666.474<br>865.peg.2267 | tRNA pseudouridine synthase B (EC 4.2.1.70)                                                                   |  | -0.122  | 0.238 | -0.187  | 0.172   | 0.84    | 0.806 | 0.697    | 0.707    |
| fig/6666666.474<br>865.peg.2145 | Succinate dehydrogenase iron-sulfur protein (EC 1.3.99.1)                                                     |  | -0.0868 | 0.237 | -0.846  | -0.522  | 0.726   | 0.49  | 0.000317 | 0.0101   |
| fig/6666666.474<br>865.peg.2229 | Ribonuclease III (EC 3.1.26.3)                                                                                |  | 0.291   | 0.236 | -0.474  | -0.528  | 0.382   | 0.651 | 0.0723   | 0.0488   |
| fig/6666666.474<br>865.peg.2073 | Phosphoribosylamine--glycine ligase (EC 6.3.4.13)                                                             |  | 0.12    | 0.235 | -0.528  | -0.413  | 0.677   | 0.537 | 0.0169   | 0.0529   |
| fig/6666666.474<br>865.peg.1804 | COG0488: ATPase components of ABC transporters with duplicated ATPase domains                                 |  | 0.0576  | 0.234 | 0.0684  | 0.245   | 0.953   | 0.859 | 0.921    | 0.676    |
| fig/6666666.474<br>865.peg.49   | Adenine-specific methyltransferase (EC 2.1.1.72)                                                              |  | -0.886  | 0.234 | -0.86   | 0.261   | 0.322   | 0.904 | 0.231    | 0.738    |
| fig/6666666.474<br>865.peg.2494 | TPR-repeat-containing protein, putative component of Menaquinone-cytochrome C reductase                       |  | -0.578  | 0.233 | -0.116  | 0.695   | 0.437   | 0.864 | 0.865    | 0.225    |
| fig/6666666.474<br>865.peg.2669 | Ribosomal protein L11 methyltransferase (EC 2.1.1.-)                                                          |  | 0.0323  | 0.233 | 0.483   | 0.684   | 0.967   | 0.855 | 0.374    | 0.2      |
| fig/6666666.474<br>865.peg.38   | Acetyl-coenzyme A carboxyl transferase beta chain (EC 6.4.1.2)                                                |  | 0.522   | 0.232 | 0.71    | 0.42    | 0.0127  | 0.419 | 0.000297 | 0.012    |
| fig/6666666.474<br>865.peg.1522 | FIG000557: hypothetical protein co-occurring with RecR                                                        |  | -0.254  | 0.23  | -0.307  | 0.177   | 0.428   | 0.629 | 0.217    | 0.485    |
| fig/6666666.474<br>865.peg.225  | ThiJ/PfpI family protein                                                                                      |  | -0.496  | 0.23  | -0.788  | -0.0621 | 0.187   | 0.708 | 0.0153   | 0.862    |
| fig/6666666.474<br>865.peg.928  | Acyltransferase                                                                                               |  | 0.156   | 0.228 | 0.569   | 0.641   | 0.893   | 0.908 | 0.466    | 0.404    |
| fig/6666666.474<br>865.peg.1687 | Teichoic acid biosynthesis protein X                                                                          |  | -0.568  | 0.227 | -0.437  | 0.357   | 0.59    | 0.914 | 0.607    | 0.67     |
| fig/6666666.474<br>865.peg.1696 | Phosphoenolpyruvate-dihydroxyacetone phosphotransferase (EC 2.7.1.121), dihydroxyacetone binding subunit DhaK |  | -1.05   | 0.227 | -0.128  | 1.15    | 0.0193  | 0.757 | 0.749    | 0.00344  |

|                                 |                                                                                                                                                            |      |         |       |        |         |         |       |          |          |
|---------------------------------|------------------------------------------------------------------------------------------------------------------------------------------------------------|------|---------|-------|--------|---------|---------|-------|----------|----------|
| fig 6666666.474<br>865.peg.44   | FIG002379: metal-dependent hydrolase                                                                                                                       |      | -0.144  | 0.227 | -0.355 | 0.0162  | 0.694   | 0.69  | 0.194    | 0.955    |
| fig 6666666.474<br>865.peg.255  | DNA ligase (EC 6.5.1.2)                                                                                                                                    |      | -0.0895 | 0.226 | 0.0198 | 0.336   | 0.681   | 0.433 | 0.921    | 0.0407   |
| fig 6666666.474<br>865.peg.2406 | tRNA-dependent lipid II-GlyGlyGly--glycine ligase @ tRNA-dependent lipid II-GlyGlyGlyGly--glycine ligase @ FemB, factor involved in methicillin resistance | femB | 0.104   | 0.223 | 1.22   | 1.34    | 0.737   | 0.618 | 9.93E-05 | 7.30E-05 |
| fig 6666666.474<br>865.peg.1581 | LSU ribosomal protein L11p (L12e)                                                                                                                          |      | 0.792   | 0.221 | -0.331 | -0.902  | 0.00999 | 0.598 | 0.141    | 0.0011   |
| fig 6666666.474<br>865.peg.951  | FIG053235: Diacylglycerol hydrolase like                                                                                                                   |      | -0.121  | 0.22  | -2.4   | -2.06   | 0.911   | 0.907 | 0.00336  | 0.00894  |
| fig 6666666.474<br>865.peg.1948 | NAD-specific glutamate dehydrogenase (EC 1.4.1.2)                                                                                                          |      | -0.28   | 0.217 | -0.538 | -0.0403 | 0.19    | 0.503 | 0.00561  | 0.841    |
| fig 6666666.474<br>865.peg.1526 | protein from nitrogen regulatory protein P-II (GLNB) family, ortholog YAAQ B. subtilis                                                                     |      | -0.392  | 0.216 | -0.389 | 0.218   | 0.196   | 0.664 | 0.116    | 0.388    |
| fig 6666666.474<br>865.peg.2627 | Aminomethyltransferase (glycine cleavage system T protein) (EC 2.1.2.10)                                                                                   |      | 0.63    | 0.214 | -0.938 | -1.35   | 0.475   | 0.906 | 0.17     | 0.052    |
| fig 6666666.474<br>865.peg.758  | Two-component response regulator                                                                                                                           |      | -0.636  | 0.214 | -1.17  | -0.318  | 0.0941  | 0.727 | 0.0012   | 0.296    |
| fig 6666666.474<br>865.peg.882  | Oxygen-insensitive NAD(P)H nitroreductase (EC 1.-.-) / Dihydropteridine reductase (EC 1.5.1.34)                                                            |      | -0.438  | 0.214 | -0.49  | 0.163   | 0.0723  | 0.542 | 0.0172   | 0.412    |
| fig 6666666.474<br>865.peg.400  | Sucrose-6-phosphate hydrolase (EC 3.2.1.26)                                                                                                                |      | 0.179   | 0.212 | 0.139  | 0.171   | 0.489   | 0.57  | 0.515    | 0.404    |
| fig 6666666.474<br>865.peg.1097 | Two-component response regulator SA14-24                                                                                                                   | walR | -1.16   | 0.209 | -0.962 | 0.41    | 0.00499 | 0.727 | 0.004    | 0.164    |
| fig 6666666.474<br>865.peg.1594 | 2-amino-3-ketobutyrate coenzyme A ligase (EC 2.3.1.29)                                                                                                     |      | 0.157   | 0.209 | -0.17  | -0.118  | 0.481   | 0.513 | 0.325    | 0.504    |
| fig 6666666.474<br>865.peg.2429 | Diaminopimelate decarboxylase (EC 4.1.1.20)                                                                                                                |      | 0.0708  | 0.209 | 0.898  | 1.04    | 0.861   | 0.708 | 0.00406  | 0.00173  |
| fig 6666666.474<br>865.peg.2227 | 3-oxoacyl-[acyl-carrier protein] reductase (EC 1.1.1.100)                                                                                                  |      | -0.124  | 0.207 | -0.151 | 0.18    | 0.517   | 0.433 | 0.304    | 0.217    |
| fig 6666666.474<br>865.peg.2687 | GTP-binding protein YqeH, required for biogenesis of 30S ribosome subunit                                                                                  |      | -0.205  | 0.205 | 0.221  | 0.632   | 0.331   | 0.513 | 0.192    | 0.00182  |
| fig 6666666.474<br>865.peg.1603 | HMP-PP hydrolase (pyridoxal phosphatase) Cof, detected in genetic screen for thiamin metabolic genes (PMID:15292217)                                       |      | 0.0191  | 0.204 | -0.383 | -0.199  | 0.962   | 0.653 | 0.0949   | 0.394    |
| fig 6666666.474<br>865.peg.247  | RNA methyltransferase, TrmA family                                                                                                                         |      | -0.309  | 0.203 | -0.063 | 0.449   | 0.461   | 0.774 | 0.87     | 0.167    |
| fig 6666666.474<br>865.peg.242  | proposed amino acid ligase found clustered with an amidotransferase                                                                                        |      | 0.11    | 0.198 | 0.32   | 0.408   | 0.763   | 0.708 | 0.23     | 0.127    |
| fig 6666666.474<br>865.peg.2607 | Branched-chain alpha-keto acid dehydrogenase, E1 component, beta subunit (EC 1.2.4.4)                                                                      |      | 0.186   | 0.197 | 0.188  | 0.199   | 0.27    | 0.432 | 0.17     | 0.147    |
| fig 6666666.474<br>865.peg.1413 | Single-stranded DNA-binding protein                                                                                                                        |      | 0.157   | 0.196 | -0.74  | -0.701  | 0.691   | 0.756 | 0.0166   | 0.0229   |
| fig 6666666.474<br>865.peg.1445 | FIG01108125: hypothetical protein                                                                                                                          |      | 0.42    | 0.192 | -0.52  | -0.748  | 0.116   | 0.653 | 0.0208   | 0.00282  |

|                                 |                                                                                                      |      |          |       |          |         |          |       |          |          |
|---------------------------------|------------------------------------------------------------------------------------------------------|------|----------|-------|----------|---------|----------|-------|----------|----------|
| fig/6666666.474<br>865.peg.516  | Glucosamine--fructose-6-phosphate aminotransferase [isomerizing] (EC 2.6.1.16)                       |      | 0.388    | 0.192 | 0.363    | 0.166   | 0.0283   | 0.437 | 0.0139   | 0.225    |
| fig/6666666.474<br>865.peg.527  | Scaffold protein for [4Fe-4S] cluster assembly ApbC, MRP-like                                        |      | -0.208   | 0.192 | -0.561   | -0.16   | 0.408    | 0.598 | 0.00887  | 0.424    |
| fig/6666666.474<br>865.peg.1085 | DNA gyrase subunit A (EC 5.99.1.3)                                                                   |      | -0.0725  | 0.191 | 0.26     | 0.523   | 0.733    | 0.522 | 0.105    | 0.00421  |
| fig/6666666.474<br>865.peg.186  | Histidine triad (HIT) nucleotide-binding protein, similarity with At5g48545 and yeast YDL125C (HNT1) |      | 0.0297   | 0.189 | 0.0379   | 0.197   | 0.924    | 0.613 | 0.871    | 0.324    |
| fig/6666666.474<br>865.peg.711  | putative esterase                                                                                    |      | -0.717   | 0.188 | -1.48    | -0.576  | 0.382    | 0.914 | 0.0267   | 0.38     |
| fig/6666666.474<br>865.peg.462  | UDP-N-acetylglucosamine 1-carboxyvinyltransferase (EC 2.5.1.7)                                       |      | -0.0475  | 0.185 | 0.04     | 0.273   | 0.782    | 0.422 | 0.787    | 0.0357   |
| fig/6666666.474<br>865.peg.571  | Acetolactate synthase, catabolic (EC 2.2.1.6)                                                        |      | -0.357   | 0.185 | -0.333   | 0.209   | 0.0544   | 0.497 | 0.0283   | 0.155    |
| fig/6666666.474<br>865.peg.1536 | SSU rRNA (adenine(1518)-N(6)/adenine(1519)-N(6))-dimethyltransferase (EC 2.1.1.182)                  |      | -0.00551 | 0.184 | -0.303   | -0.113  | 0.983    | 0.655 | 0.146    | 0.607    |
| fig/6666666.474<br>865.peg.91   | Beta-lactamase (EC 3.5.2.6)                                                                          |      | -0.0954  | 0.182 | 2.8      | 3.08    | 0.544    | 0.419 | 5.30E-11 | 1.47E-11 |
| fig/6666666.474<br>865.peg.2239 | 50S ribosomal subunit maturation GTPase RbgA (B. subtilis Y1qF)                                      |      | 0.354    | 0.182 | -0.00981 | -0.182  | 0.144    | 0.629 | 0.964    | 0.358    |
| fig/6666666.474<br>865.peg.1060 | N-hydroxyarylamine O-acetyltransferase (EC 2.3.1.118)                                                |      | -0.247   | 0.179 | 1.21     | 1.63    | 0.658    | 0.853 | 0.0067   | 0.00105  |
| fig/6666666.474<br>865.peg.1889 | Organic hydroperoxide resistance protein                                                             |      | -0.882   | 0.179 | -1.17    | -0.106  | 0.0748   | 0.846 | 0.00729  | 0.814    |
| fig/6666666.474<br>865.peg.2205 | Guanylate kinase (EC 2.7.4.8)                                                                        |      | 0.0106   | 0.179 | -0.554   | -0.386  | 0.967    | 0.652 | 0.0102   | 0.057    |
| fig/6666666.474<br>865.peg.859  | Fibronectin binding protein FnBA                                                                     |      | 0.254    | 0.179 | 0.152    | 0.0772  | 0.787    | 0.926 | 0.853    | 0.917    |
| fig/6666666.474<br>865.peg.2107 | GTP-binding protein TypA/BipA                                                                        |      | 0.162    | 0.177 | -0.106   | -0.0902 | 0.203    | 0.377 | 0.307    | 0.394    |
| fig/6666666.474<br>865.peg.2470 | Uncharacterized protein Bsub YpbR                                                                    |      | 0.155    | 0.173 | 0.478    | 0.496   | 0.689    | 0.775 | 0.0917   | 0.0794   |
| fig/6666666.474<br>865.peg.1544 | Ribose-phosphate pyrophosphokinase (EC 2.7.6.1)                                                      |      | -0.0903  | 0.172 | -0.287   | -0.0245 | 0.613    | 0.467 | 0.0319   | 0.87     |
| fig/6666666.474<br>865.peg.2356 | FIG01108654: hypothetical protein                                                                    |      | -0.706   | 0.172 | -0.0984  | 0.78    | 0.0456   | 0.774 | 0.765    | 0.0102   |
| fig/6666666.474<br>865.peg.426  | Serine-protein kinase RsbW (EC 2.7.11.1)                                                             |      | -0.156   | 0.167 | -0.676   | -0.353  | 0.463    | 0.588 | 0.00076  | 0.0385   |
| fig/6666666.474<br>865.peg.487  | UDP-N-acetylglucosamine 1-carboxyvinyltransferase (EC 2.5.1.7)                                       | murZ | 0.962    | 0.164 | 2.13     | 1.34    | 0.000114 | 0.536 | 3.22E-09 | 1.12E-06 |
| fig/6666666.474<br>865.peg.2091 | Pyruvate dehydrogenase E1 component alpha subunit (EC 1.2.4.1)                                       |      | -0.229   | 0.164 | -0.0632  | 0.33    | 0.153    | 0.503 | 0.667    | 0.0183   |
| fig/6666666.474<br>865.peg.2365 | Catalase (EC 1.11.1.6)                                                                               |      | -0.156   | 0.164 | -0.887   | -0.566  | 0.598    | 0.708 | 0.000852 | 0.0159   |
| fig/6666666.474<br>865.peg.2071 | Phosphoribosylglycinamide formyltransferase (EC 2.1.2.2)                                             |      | -0.0177  | 0.161 | -0.98    | -0.801  | 0.967    | 0.806 | 0.00291  | 0.0104   |

|                                 |                                                                                                                                    |      |         |       |         |         |        |       |          |          |
|---------------------------------|------------------------------------------------------------------------------------------------------------------------------------|------|---------|-------|---------|---------|--------|-------|----------|----------|
| fig/6666666.474<br>865.peg.941  | Predicted hydrolase/acyltransferase                                                                                                |      | -0.477  | 0.16  | -0.36   | 0.276   | 0.231  | 0.827 | 0.263    | 0.399    |
| fig/6666666.474<br>865.peg.2068 | Phosphoribosylformylglycinamide synthase, synthetase subunit (EC 6.3.5.3)                                                          |      | -0.201  | 0.159 | -0.56   | -0.2    | 0.182  | 0.479 | 0.000309 | 0.103    |
| fig/6666666.474<br>865.peg.1093 | Phosphoesterase, DHH family protein                                                                                                |      | -1.21   | 0.157 | 0.0883  | 1.46    | 0.183  | 0.943 | 0.923    | 0.0533   |
| fig/6666666.474<br>865.peg.1788 | oxidoreductase of aldo/keto reductase family, subgroup 1                                                                           |      | -0.223  | 0.157 | -0.358  | 0.0228  | 0.366  | 0.699 | 0.0706   | 0.915    |
| fig/6666666.474<br>865.peg.431  | Alanine racemase (EC 5.1.1.1)                                                                                                      |      | -0.241  | 0.155 | 0.0369  | 0.433   | 0.533  | 0.82  | 0.921    | 0.143    |
| fig/6666666.474<br>865.peg.1850 | Hypothetical ATP-binding protein UPF0042, contains P-loop                                                                          |      | -0.387  | 0.154 | 1.04    | 1.58    | 0.203  | 0.774 | 0.000633 | 3.47E-05 |
| fig/6666666.474<br>865.peg.288  | Aspartate aminotransferase (EC 2.6.1.1)                                                                                            |      | -0.225  | 0.154 | -0.0856 | 0.292   | 0.238  | 0.596 | 0.611    | 0.062    |
| fig/6666666.474<br>865.peg.568  | HMP-PP hydrolase (pyridoxal phosphatase) Cof, detected in genetic screen for thiamin metabolic genes (PMID:15292217)               |      | -0.858  | 0.154 | -0.244  | 0.768   | 0.254  | 0.933 | 0.732    | 0.21     |
| fig/6666666.474<br>865.peg.2064 | Phosphoribosylaminoimidazole carboxylase ATPase subunit (EC 4.1.1.21)                                                              |      | -0.193  | 0.151 | -0.559  | -0.215  | 0.27   | 0.57  | 0.00112  | 0.133    |
| fig/6666666.474<br>865.peg.667  | Formate dehydrogenase related protein                                                                                              |      | -0.607  | 0.151 | -1.18   | -0.419  | 0.0917 | 0.82  | 0.000757 | 0.145    |
| fig/6666666.474<br>865.peg.254  | Putative pheromone cAM373 precursor lipoprotein CamS                                                                               |      | 0.658   | 0.15  | -0.0806 | -0.589  | 0.0684 | 0.82  | 0.817    | 0.0466   |
| fig/6666666.474<br>865.peg.1970 | Phospholipid-binding protein                                                                                                       |      | -0.86   | 0.149 | -1.36   | -0.352  | 0.447  | 0.947 | 0.119    | 0.71     |
| fig/6666666.474<br>865.peg.2254 | Uridine monophosphate kinase (EC 2.7.4.22)                                                                                         |      | 0.0812  | 0.145 | 0.285   | 0.349   | 0.755  | 0.708 | 0.136    | 0.07     |
| fig/6666666.474<br>865.peg.406  | ABC transporter ATP-binding protein uup                                                                                            |      | -1.18   | 0.145 | -0.825  | 0.498   | 0.0588 | 0.912 | 0.0949   | 0.319    |
| fig/6666666.474<br>865.peg.485  | Aldehyde dehydrogenase (EC 1.2.1.3)                                                                                                |      | 0.0118  | 0.144 | 0.0117  | 0.144   | 0.966  | 0.694 | 0.957    | 0.419    |
| fig/6666666.474<br>865.peg.1539 | PurR: transcription regulator associated with purine metabolism                                                                    |      | -0.31   | 0.142 | 0.23    | 0.683   | 0.232  | 0.752 | 0.277    | 0.00453  |
| fig/6666666.474<br>865.peg.2447 | UDP-N-acetylglucosamine--N-acetylmuramyl-(pentapeptide) pyrophosphoryl-undecaprenol N-acetylglucosamine transferase (EC 2.4.1.227) | murG | -0.0149 | 0.141 | 0.00778 | 0.164   | 0.962  | 0.69  | 0.967    | 0.339    |
| fig/6666666.474<br>865.peg.1894 | Glycine cleavage system H protein                                                                                                  |      | 0.103   | 0.14  | -0.651  | -0.614  | 0.666  | 0.699 | 0.0015   | 0.00249  |
| fig/6666666.474<br>865.peg.2722 | Histidyl-tRNA synthetase (EC 6.1.1.21)                                                                                             |      | 0.209   | 0.14  | -0.261  | -0.33   | 0.48   | 0.776 | 0.255    | 0.15     |
| fig/6666666.474<br>865.peg.424  | Transcription accessory protein (S1 RNA-binding domain)                                                                            |      | 0.11    | 0.14  | -0.282  | -0.252  | 0.661  | 0.707 | 0.119    | 0.164    |
| fig/6666666.474<br>865.peg.1925 | Poly(glycerophosphate chain) D-alanine transfer protein DltD                                                                       |      | -0.0531 | 0.139 | -0.412  | -0.22   | 0.871  | 0.776 | 0.0718   | 0.339    |
| fig/6666666.474<br>865.peg.523  | Phosphoglucosamine mutase (EC 5.4.2.10) / FemD, factor involved in methicillin resistance                                          |      | -0.0754 | 0.137 | -0.262  | -0.0493 | 0.643  | 0.529 | 0.0302   | 0.699    |

|                                 |                                                                                                                                                        |  |         |       |        |         |         |       |          |          |
|---------------------------------|--------------------------------------------------------------------------------------------------------------------------------------------------------|--|---------|-------|--------|---------|---------|-------|----------|----------|
| fig/6666666.474<br>865.peg.210  | Peroxide stress regulator PerR, FUR family                                                                                                             |  | -0.319  | 0.136 | -0.172 | 0.284   | 0.536   | 0.898 | 0.703    | 0.483    |
| fig/6666666.474<br>865.peg.2063 | Phosphoribosylaminoimidazole carboxylase catalytic subunit (EC 4.1.1.21)                                                                               |  | -0.351  | 0.135 | -1.03  | -0.542  | 0.15    | 0.747 | 9.99E-05 | 0.0117   |
| fig/6666666.474<br>865.peg.1303 | Putative polyribitolphosphotransferase                                                                                                                 |  | -0.0569 | 0.133 | 0.149  | 0.339   | 0.83    | 0.727 | 0.434    | 0.0699   |
| fig/6666666.474<br>865.peg.1762 | FIG01107934: hypothetical protein                                                                                                                      |  | -0.202  | 0.133 | -1.21  | -0.877  | 0.431   | 0.757 | 2.79E-05 | 0.000562 |
| fig/6666666.474<br>865.peg.966  | Acyl-coenzyme A synthetases/AMP-(fatty) acid ligases, YtcI homolog                                                                                     |  | -0.326  | 0.133 | -0.212 | 0.246   | 0.0838  | 0.66  | 0.16     | 0.103    |
| fig/6666666.474<br>865.peg.2221 | FIG001802: Putative alkaline-shock protein                                                                                                             |  | 0.036   | 0.131 | -0.109 | -0.0141 | 0.897   | 0.731 | 0.589    | 0.941    |
| fig/6666666.474<br>865.peg.2738 | LSU ribosomal protein L21p                                                                                                                             |  | 0.505   | 0.13  | -0.131 | -0.506  | 0.0141  | 0.681 | 0.398    | 0.00395  |
| fig/6666666.474<br>865.peg.40   | DNA polymerase III alpha subunit (EC 2.7.7.7)                                                                                                          |  | 1.29    | 0.13  | 1.02   | -0.14   | 0.231   | 0.956 | 0.244    | 0.885    |
| fig/6666666.474<br>865.peg.2651 | RNA polymerase sigma factor RpoD                                                                                                                       |  | 0.216   | 0.128 | -0.12  | -0.208  | 0.437   | 0.79  | 0.605    | 0.338    |
| fig/6666666.474<br>865.peg.1962 | FIG002540: Haloacid dehalogenase-like hydrolase                                                                                                        |  | 0.193   | 0.127 | 0.486  | 0.419   | 0.216   | 0.592 | 0.0013   | 0.00399  |
| fig/6666666.474<br>865.peg.1784 | 1-phosphofructokinase (EC 2.7.1.56)                                                                                                                    |  | -0.214  | 0.126 | -0.682 | -0.342  | 0.419   | 0.775 | 0.00347  | 0.0947   |
| fig/6666666.474<br>865.peg.2393 | 4-oxalocrotonate tautomerase (EC 5.3.2.-)                                                                                                              |  | 0.378   | 0.125 | -1.85  | -2.1    | 0.282   | 0.855 | 1.64E-05 | 1.05E-05 |
| fig/6666666.474<br>865.peg.549  | Bifunctional protein: zinc-containing alcohol dehydrogenase; quinone oxidoreductase ( NADPH:quinone reductase) (EC 1.1.1.-); Similar to arginate lyase |  | -1.39   | 0.123 | -1.25  | 0.269   | 0.0941  | 0.946 | 0.0625   | 0.707    |
| fig/6666666.474<br>865.peg.2566 | Phage protein                                                                                                                                          |  | -0.376  | 0.122 | 0.629  | 1.13    | 0.736   | 0.956 | 0.47     | 0.179    |
| fig/6666666.474<br>865.peg.1821 | Iron compound ABC uptake transporter substrate-binding protein                                                                                         |  | 0.203   | 0.121 | -0.591 | -0.672  | 0.602   | 0.861 | 0.0439   | 0.0262   |
| fig/6666666.474<br>865.peg.2283 | FIG01107999: hypothetical protein                                                                                                                      |  | -0.861  | 0.121 | -1.42  | -0.443  | 0.0729  | 0.906 | 0.0016   | 0.246    |
| fig/6666666.474<br>865.peg.238  | Methionine aminopeptidase (EC 3.4.11.18)                                                                                                               |  | -0.41   | 0.121 | -0.534 | -0.0027 | 0.116   | 0.799 | 0.016    | 0.991    |
| fig/6666666.474<br>865.peg.2489 | Glycosyl transferase, group 1 family protein                                                                                                           |  | 0.0335  | 0.121 | 0.434  | 0.522   | 0.938   | 0.845 | 0.102    | 0.0533   |
| fig/6666666.474<br>865.peg.2031 | FIG01108706: hypothetical protein                                                                                                                      |  | -0.607  | 0.12  | -1.08  | -0.358  | 0.00341 | 0.693 | 4.79E-06 | 0.0198   |
| fig/6666666.474<br>865.peg.2175 | rRNA small subunit methyltransferase H                                                                                                                 |  | -0.445  | 0.12  | 0.0484 | 0.614   | 0.0815  | 0.796 | 0.845    | 0.0069   |
| fig/6666666.474<br>865.peg.2242 | Succinyl-CoA ligase [ADP-forming] alpha chain (EC 6.2.1.5)                                                                                             |  | -0.13   | 0.12  | -0.572 | -0.321  | 0.544   | 0.712 | 0.00255  | 0.0533   |
| fig/6666666.474<br>865.peg.1599 | Hydrolase, haloacid dehalogenase-like family                                                                                                           |  | -0.326  | 0.119 | -0.626 | -0.181  | 0.165   | 0.774 | 0.00403  | 0.355    |

|                                 |                                                                                                                   |  |         |        |         |          |          |       |          |          |
|---------------------------------|-------------------------------------------------------------------------------------------------------------------|--|---------|--------|---------|----------|----------|-------|----------|----------|
| fig/6666666.474<br>865.peg.1555 | Cell division protein FtsH (EC 3.4.24.-)                                                                          |  | 0.224   | 0.118  | 0.404   | 0.298    | 0.15     | 0.624 | 0.00434  | 0.0246   |
| fig/6666666.474<br>865.peg.2058 | quinol oxidase polypeptide II QoxA (EC:1.9.3.-)                                                                   |  | -0.379  | 0.118  | -1.3    | -0.804   | 0.102    | 0.773 | 7.77E-06 | 0.000621 |
| fig/6666666.474<br>865.peg.1716 | FIG007491: hypothetical protein YeeN                                                                              |  | -0.3    | 0.117  | -0.768  | -0.351   | 0.121    | 0.708 | 0.000166 | 0.0318   |
| fig/6666666.474<br>865.peg.2643 | Manganese superoxide dismutase (EC 1.15.1.1); Superoxide dismutase                                                |  | -0.105  | 0.117  | 0.634   | 0.856    | 0.719    | 0.811 | 0.00699  | 0.0011   |
| fig/6666666.474<br>865.peg.129  | Hypothetical protein SAV1789                                                                                      |  | -0.213  | 0.116  | -0.236  | 0.0921   | 0.33     | 0.761 | 0.177    | 0.615    |
| fig/6666666.474<br>865.peg.2189 | Isoleucyl-tRNA synthetase (EC 6.1.1.5)                                                                            |  | 0.0646  | 0.116  | -0.0522 | -0.00099 | 0.672    | 0.57  | 0.673    | 0.993    |
| fig/6666666.474<br>865.peg.2380 | Aconitate hydratase (EC 4.2.1.3)                                                                                  |  | 0.262   | 0.116  | -0.403  | -0.549   | 0.176    | 0.712 | 0.0157   | 0.00282  |
| fig/6666666.474<br>865.peg.2266 | Ribosome-binding factor A                                                                                         |  | 0.113   | 0.113  | -0.116  | -0.116   | 0.701    | 0.82  | 0.628    | 0.612    |
| fig/6666666.474<br>865.peg.117  | Autolysin (EC 3.5.1.28)                                                                                           |  | 0.289   | 0.112  | 0.749   | 0.571    | 0.395    | 0.861 | 0.00975  | 0.039    |
| fig/6666666.474<br>865.peg.2069 | Amidophosphoribosyltransferase (EC 2.4.2.14)                                                                      |  | 0.059   | 0.111  | -0.536  | -0.484   | 0.777    | 0.714 | 0.00236  | 0.00486  |
| fig/6666666.474<br>865.peg.502  | Non-specific DNA-binding protein Dps / Iron-binding ferritin-like antioxidant protein / Ferroxidase (EC 1.16.3.1) |  | -0.0438 | 0.11   | 0.496   | 0.649    | 0.868    | 0.779 | 0.0113   | 0.00233  |
| fig/6666666.474<br>865.peg.110  | 6,7-dimethyl-8-ribityllumazine synthase (EC 2.5.1.78)                                                             |  | 0.419   | 0.105  | 0.287   | -0.0266  | 0.0432   | 0.77  | 0.078    | 0.884    |
| fig/6666666.474<br>865.peg.1161 | Oleate hydratase (EC 4.2.1.53)                                                                                    |  | -0.512  | 0.105  | -0.685  | -0.0688  | 0.554    | 0.953 | 0.299    | 0.92     |
| fig/6666666.474<br>865.peg.2438 | Nitric oxide reductase activation protein NorQ                                                                    |  | -0.119  | 0.105  | 0.288   | 0.512    | 0.545    | 0.735 | 0.0581   | 0.00327  |
| fig/6666666.474<br>865.peg.730  | Malate:quinone oxidoreductase (EC 1.1.5.4)                                                                        |  | -0.216  | 0.105  | -0.862  | -0.541   | 0.408    | 0.82  | 0.000587 | 0.0138   |
| fig/6666666.474<br>865.peg.2135 | Phenylalanyl-tRNA synthetase beta chain (EC 6.1.1.20)                                                             |  | 0.0896  | 0.104  | -0.165  | -0.151   | 0.726    | 0.814 | 0.396    | 0.436    |
| fig/6666666.474<br>865.peg.1678 | Manganese ABC transporter, periplasmic-binding protein SitA                                                       |  | -1.41   | 0.102  | -1.96   | -0.452   | 0.000125 | 0.836 | 8.07E-07 | 0.0406   |
| fig/6666666.474<br>865.peg.7    | Porphobilinogen synthase (EC 4.2.1.24)                                                                            |  | -0.404  | 0.102  | -0.729  | -0.223   | 0.175    | 0.861 | 0.00653  | 0.368    |
| fig/6666666.474<br>865.peg.2259 | Prolyl-tRNA synthetase (EC 6.1.1.15), bacterial type                                                              |  | 0.359   | 0.101  | 1.21    | 0.955    | 0.0607   | 0.756 | 2.45E-06 | 3.53E-05 |
| fig/6666666.474<br>865.peg.1845 | HPr kinase/phosphorylase (EC 2.7.1.-) (EC 2.7.4.-)                                                                |  | -0.184  | 0.1    | 0.24    | 0.524    | 0.247    | 0.703 | 0.0657   | 0.00105  |
| fig/6666666.474<br>865.peg.2457 | Thymidylate synthase (EC 2.1.1.45)                                                                                |  | -0.0648 | 0.1    | -0.413  | -0.247   | 0.8      | 0.814 | 0.0304   | 0.181    |
| fig/6666666.474<br>865.peg.1797 | Queuosine Biosynthesis QueC ATPase                                                                                |  | 0.615   | 0.0994 | -0.0719 | -0.588   | 0.232    | 0.937 | 0.888    | 0.162    |
| fig/6666666.474<br>865.peg.2125 | Cell surface receptor IsdB for hemoglobin and hemoglobin-haptoglobin complexes                                    |  | 0.186   | 0.0983 | -0.191  | -0.278   | 0.716    | 0.926 | 0.645    | 0.468    |

|                                 |                                                                                                                                                  |      |         |        |         |        |        |       |          |          |
|---------------------------------|--------------------------------------------------------------------------------------------------------------------------------------------------|------|---------|--------|---------|--------|--------|-------|----------|----------|
| fig/6666666.474<br>865.peg.2414 | Oligoendopeptidase F (EC 3.4.24.-)                                                                                                               |      | -0.326  | 0.098  | 0.941   | 1.37   | 0.134  | 0.806 | 8.29E-05 | 6.21E-06 |
| fig/6666666.474<br>865.peg.2421 | ABC transporter ATP-binding protein uup                                                                                                          |      | -0.289  | 0.0954 | -0.63   | -0.246 | 0.0691 | 0.708 | 0.000153 | 0.057    |
| fig/6666666.474<br>865.peg.2070 | Phosphoribosylformylglycinamide cyclo-ligase (EC 6.3.3.1)                                                                                        |      | -0.0284 | 0.095  | -0.824  | -0.7   | 0.893  | 0.735 | 3.00E-05 | 0.000184 |
| fig/6666666.474<br>865.peg.2572 | Phage repressor                                                                                                                                  |      | -0.342  | 0.0948 | -1.22   | -0.787 | 0.241  | 0.865 | 0.00011  | 0.00395  |
| fig/6666666.474<br>865.peg.1766 | FIG01108121: hypothetical protein                                                                                                                |      | -0.166  | 0.0943 | 0.0397  | 0.3    | 0.478  | 0.82  | 0.854    | 0.0993   |
| fig/6666666.474<br>865.peg.620  | tRNA-dependent lipid II--glycine ligase (FmhB)                                                                                                   |      | -0.0104 | 0.0932 | -0.271  | -0.168 | 0.962  | 0.674 | 0.0179   | 0.125    |
| fig/6666666.474<br>865.peg.1582 | LSU ribosomal protein L1p (L10Ac)                                                                                                                |      | 0.184   | 0.0931 | -0.0447 | -0.136 | 0.183  | 0.693 | 0.732    | 0.225    |
| fig/6666666.474<br>865.peg.1839 | Peptide chain release factor 2; programmed frameshift-containing                                                                                 |      | -0.443  | 0.0927 | -0.647  | -0.112 | 0.322  | 0.926 | 0.0724   | 0.776    |
| fig/6666666.474<br>865.peg.1907 | Putative iron-sulfur cluster assembly scaffold protein for SUF system, SufE2                                                                     |      | -0.17   | 0.0924 | -0.388  | -0.126 | 0.658  | 0.903 | 0.161    | 0.67     |
| fig/6666666.474<br>865.peg.2287 | FIG01108320: hypothetical protein                                                                                                                |      | -1.67   | 0.0915 | -1.21   | 0.558  | 0.0172 | 0.947 | 0.0276   | 0.296    |
| fig/6666666.474<br>865.peg.504  | Hypothetical protein SAV2141                                                                                                                     |      | -0.8    | 0.0915 | -0.18   | 0.711  | 0.0244 | 0.903 | 0.536    | 0.0154   |
| fig/6666666.474<br>865.peg.1834 | FIG005590: DegV family protein                                                                                                                   |      | -0.345  | 0.091  | -0.614  | -0.178 | 0.313  | 0.903 | 0.0297   | 0.532    |
| fig/6666666.474<br>865.peg.2182 | Cell division protein FtsZ (EC 3.4.24.-)                                                                                                         |      | -0.0336 | 0.0898 | -0.104  | 0.0199 | 0.832  | 0.699 | 0.362    | 0.875    |
| fig/6666666.474<br>865.peg.643  | Ferrichrome-binding periplasmic protein precursor (TC 3.A.1.14.3)                                                                                |      | 0.383   | 0.0897 | -0.194  | -0.488 | 0.22   | 0.895 | 0.458    | 0.0575   |
| fig/6666666.474<br>865.peg.608  | LSU ribosomal protein L4p (L1e)                                                                                                                  |      | 0.431   | 0.0896 | -0.506  | -0.848 | 0.116  | 0.864 | 0.0268   | 0.0015   |
| fig/6666666.474<br>865.peg.1786 | N-acetylglucosamine-6-phosphate deacetylase (EC 3.5.1.25)                                                                                        |      | -0.564  | 0.0888 | -0.107  | 0.546  | 0.0172 | 0.827 | 0.582    | 0.00618  |
| fig/6666666.474<br>865.peg.2448 | Acetyltransferase (GNAT) family                                                                                                                  |      | -0.214  | 0.0888 | 0.382   | 0.685  | 0.618  | 0.915 | 0.224    | 0.0356   |
| fig/6666666.474<br>865.peg.2405 | tRNA-dependent lipid II-Gly--glycine ligase @ tRNA-dependent lipid II-GlyGly--glycine ligase @ FemA, factor essential for methicillin resistance | femA | 0.221   | 0.0885 | 0.732   | 0.599  | 0.15   | 0.727 | 3.62E-05 | 0.000284 |
| fig/6666666.474<br>865.peg.971  | FIG009707: Betaine operon transcriptional regulator                                                                                              |      | 0.787   | 0.0881 | -0.444  | -1.14  | 0.0967 | 0.941 | 0.241    | 0.0067   |
| fig/6666666.474<br>865.peg.1302 | Xylitol dehydrogenase                                                                                                                            |      | 0.158   | 0.0872 | 0.426   | 0.355  | 0.461  | 0.82  | 0.0157   | 0.039    |
| fig/6666666.474<br>865.peg.466  | ATP synthase gamma chain (EC 3.6.3.14)                                                                                                           |      | -0.213  | 0.0871 | -0.172  | 0.129  | 0.258  | 0.806 | 0.264    | 0.412    |
| fig/6666666.474<br>865.peg.696  | FIG01108370: hypothetical protein                                                                                                                |      | 0.557   | 0.0865 | -0.085  | -0.556 | 0.109  | 0.906 | 0.798    | 0.0516   |



|                                 |                                                                                                           |      |         |        |         |        |         |       |          |          |
|---------------------------------|-----------------------------------------------------------------------------------------------------------|------|---------|--------|---------|--------|---------|-------|----------|----------|
| fig 6666666.474<br>865.peg.594  | LSU ribosomal protein L6p (L9e)                                                                           |      | 0.0884  | 0.0842 | 0.0252  | 0.021  | 0.526   | 0.699 | 0.845    | 0.867    |
| fig 6666666.474<br>865.peg.1816 | Ribonucleotide reductase of class Ib (aerobic), alpha subunit (EC 1.17.4.1)                               |      | -0.493  | 0.0841 | -0.538  | 0.0395 | 0.00152 | 0.695 | 9.88E-05 | 0.721    |
| fig 6666666.474<br>865.peg.2721 | Aspartyl-tRNA synthetase (EC 6.1.1.12)                                                                    |      | -0.316  | 0.0839 | -0.274  | 0.126  | 0.0197  | 0.695 | 0.0129   | 0.221    |
| fig 6666666.474<br>865.peg.547  | Hypothetical protein SAV2184                                                                              |      | 0.272   | 0.0839 | -0.639  | -0.827 | 0.627   | 0.943 | 0.115    | 0.047    |
| fig 6666666.474<br>865.peg.673  | Sialic acid utilization regulator, RpiR family                                                            |      | 0.344   | 0.0833 | -0.216  | -0.477 | 0.533   | 0.943 | 0.645    | 0.257    |
| fig 6666666.474<br>865.peg.1691 | nucleoside transport protein                                                                              |      | 0.232   | 0.0815 | 1.85    | 1.7    | 0.783   | 0.959 | 0.00665  | 0.0115   |
| fig 6666666.474<br>865.peg.1647 | hypothetical fig 282458.1.peg.579 homolog                                                                 |      | -0.901  | 0.0814 | -0.512  | 0.47   | 0.19    | 0.956 | 0.368    | 0.41     |
| fig 6666666.474<br>865.peg.2740 | Rod shape-determining protein MreC                                                                        |      | 0.00249 | 0.0806 | 0.28    | 0.358  | 0.991   | 0.89  | 0.205    | 0.105    |
| fig 6666666.474<br>865.peg.2368 | GMP reductase (EC 1.7.1.7)                                                                                |      | 0.501   | 0.08   | 0.314   | -0.107 | 0.0137  | 0.819 | 0.0406   | 0.487    |
| fig 6666666.474<br>865.peg.1055 | Collagen binding protein Cna                                                                              |      | 1.29    | 0.0788 | -1.46   | -2.67  | 0.0432  | 0.953 | 0.00774  | 0.000129 |
| fig 6666666.474<br>865.peg.2702 | Transcription elongation factor GreA                                                                      |      | 0.282   | 0.0784 | -0.0741 | -0.278 | 0.109   | 0.807 | 0.633    | 0.053    |
| fig 6666666.474<br>865.peg.2458 | FIG01226173: hypothetical protein                                                                         |      | -0.362  | 0.0765 | -0.565  | -0.126 | 0.187   | 0.902 | 0.0168   | 0.589    |
| fig 6666666.474<br>865.peg.2660 | Metal-dependent hydrolase YbeY, involved in rRNA and/or ribosome maturation and assembly                  |      | -0.299  | 0.0753 | -0.757  | -0.383 | 0.725   | 0.964 | 0.229    | 0.56     |
| fig 6666666.474<br>865.peg.1705 | Two-component response regulator BceR                                                                     |      | -0.204  | 0.0747 | -0.247  | 0.0316 | 0.446   | 0.891 | 0.233    | 0.89     |
| fig 6666666.474<br>865.peg.1888 | FIG01108288: hypothetical protein                                                                         |      | -0.257  | 0.0742 | -0.144  | 0.187  | 0.58    | 0.943 | 0.721    | 0.608    |
| fig 6666666.474<br>865.peg.183  | Uncharacterized protein, homolog of B.subtilis yhgC                                                       |      | 0.0963  | 0.0728 | 0.819   | 0.796  | 0.658   | 0.844 | 0.000104 | 0.000216 |
| fig 6666666.474<br>865.peg.1583 | LSU ribosomal protein L10p (P0)                                                                           |      | 0.183   | 0.0725 | -0.465  | -0.575 | 0.435   | 0.864 | 0.0155   | 0.00493  |
| fig 6666666.474<br>865.peg.353  | Phage repressor                                                                                           |      | 0.243   | 0.0725 | -0.465  | -0.635 | 0.232   | 0.855 | 0.00973  | 0.0015   |
| fig 6666666.474<br>865.peg.427  | Anti-sigma F factor antagonist (spoIIAA-2); Anti-sigma B factor antagonist RsbV                           |      | -0.249  | 0.0724 | -0.813  | -0.492 | 0.36    | 0.903 | 0.00152  | 0.0307   |
| fig 6666666.474<br>865.peg.2    | Valyl-tRNA synthetase (EC 6.1.1.9)                                                                        |      | -0.0339 | 0.0716 | -0.0188 | 0.0868 | 0.798   | 0.708 | 0.87     | 0.377    |
| fig 6666666.474<br>865.peg.2179 | UDP-N-acetylmuramoylalanine--D-glutamate ligase (EC 6.3.2.9)                                              | murD | 0.156   | 0.0714 | 0.809   | 0.724  | 0.544   | 0.89  | 0.000739 | 0.00198  |
| fig 6666666.474<br>865.peg.2072 | IMP cyclohydrolase (EC 3.5.4.10) / Phosphoribosylaminoimidazolecarboxamide formyltransferase (EC 2.1.2.3) |      | -0.343  | 0.0711 | -0.892  | -0.478 | 0.0668  | 0.836 | 3.22E-05 | 0.00469  |

|                                 |                                                                                              |      |         |        |         |         |         |       |          |          |
|---------------------------------|----------------------------------------------------------------------------------------------|------|---------|--------|---------|---------|---------|-------|----------|----------|
| fig 6666666.474<br>865.peg.354  | DNA helicase, phage-associated                                                               |      | -0.43   | 0.0709 | -1.46   | -0.956  | 0.278   | 0.943 | 0.000334 | 0.00749  |
| fig 6666666.474<br>865.peg.2474 | FIG001721: Predicted N6-adenine-specific DNA methylase                                       |      | 0.374   | 0.0706 | 0.387   | 0.0836  | 0.0669  | 0.856 | 0.0226   | 0.623    |
| fig 6666666.474<br>865.peg.2093 | Dihydrolipoamide acetyltransferase component of pyruvate dehydrogenase complex (EC 2.3.1.12) |      | -0.113  | 0.0696 | 0.119   | 0.302   | 0.429   | 0.774 | 0.283    | 0.0118   |
| fig 6666666.474<br>865.peg.2225 | Phosphate:acyl-ACP acyltransferase PlsX                                                      |      | 0.129   | 0.0696 | 0.00756 | -0.0522 | 0.461   | 0.823 | 0.962    | 0.722    |
| fig 6666666.474<br>865.peg.2247 | tRNA:m(5)U-54 MTase gid                                                                      |      | -0.705  | 0.0694 | -1.38   | -0.61   | 0.0207  | 0.912 | 3.58E-05 | 0.0153   |
| fig 6666666.474<br>865.peg.916  | Maltose O-acetyltransferase (EC 2.3.1.79)                                                    |      | 0.355   | 0.0693 | -1.12   | -1.4    | 0.482   | 0.947 | 0.00887  | 0.00233  |
| fig 6666666.474<br>865.peg.453  | Hydroxyethylthiazole kinase (EC 2.7.1.50)                                                    |      | -0.338  | 0.0692 | 0.38    | 0.787   | 0.15    | 0.891 | 0.0516   | 0.00097  |
| fig 6666666.474<br>865.peg.838  | FIG01108532: hypothetical protein                                                            |      | -0.107  | 0.0686 | 0.372   | 0.547   | 0.84    | 0.946 | 0.315    | 0.14     |
| fig 6666666.474<br>865.peg.1770 | Transcriptional regulator MgrA (Regulator of autolytic activity)                             | mgrA | 0.0451  | 0.0681 | -0.54   | -0.517  | 0.83    | 0.842 | 0.00167  | 0.00255  |
| fig 6666666.474<br>865.peg.1900 | Methionine ABC transporter substrate-binding protein                                         |      | 0.402   | 0.0667 | -0.206  | -0.541  | 0.231   | 0.934 | 0.466    | 0.0517   |
| fig 6666666.474<br>865.peg.2388 | UPF0118 membrane protein YrrI                                                                |      | 0.247   | 0.065  | 2.96    | 2.78    | 0.782   | 0.969 | 0.000321 | 0.000705 |
| fig 6666666.474<br>865.peg.2619 | Translation elongation factor P                                                              |      | 0.104   | 0.0642 | -0.243  | -0.283  | 0.643   | 0.865 | 0.132    | 0.0804   |
| fig 6666666.474<br>865.peg.1554 | Hypoxanthine-guanine phosphoribosyltransferase (EC 2.4.2.8)                                  |      | 0.0596  | 0.0641 | -0.0978 | -0.0933 | 0.78    | 0.861 | 0.561    | 0.564    |
| fig 6666666.474<br>865.peg.605  | SSU ribosomal protein S19p (S15e)                                                            |      | 0.48    | 0.0641 | 0.386   | -0.0296 | 0.00573 | 0.82  | 0.00542  | 0.835    |
| fig 6666666.474<br>865.peg.2420 | S1 RNA binding domain                                                                        |      | 0.144   | 0.0632 | -0.0439 | -0.125  | 0.383   | 0.831 | 0.776    | 0.343    |
| fig 6666666.474<br>865.peg.2587 | ADP-ribose pyrophosphatase (EC 3.6.1.13)                                                     |      | -0.987  | 0.0631 | -0.529  | 0.521   | 0.222   | 0.969 | 0.432    | 0.433    |
| fig 6666666.474<br>865.peg.1299 | Putative polyribitolphosphotransferase                                                       |      | -0.518  | 0.0622 | 0.231   | 0.811   | 0.191   | 0.946 | 0.499    | 0.0188   |
| fig 6666666.474<br>865.peg.2726 | Adenine phosphoribosyltransferase (EC 2.4.2.7)                                               |      | 0.0464  | 0.062  | 0.403   | 0.419   | 0.928   | 0.946 | 0.223    | 0.203    |
| fig 6666666.474<br>865.peg.441  | DEAD-box ATP-dependent RNA helicase CshA (EC 3.6.4.13)                                       |      | 0.238   | 0.062  | 0.0802  | -0.096  | 0.088   | 0.807 | 0.49     | 0.397    |
| fig 6666666.474<br>865.peg.475  | Serine hydroxymethyltransferase (EC 2.1.2.1)                                                 |      | -0.0638 | 0.0608 | -0.181  | -0.0562 | 0.755   | 0.864 | 0.23     | 0.729    |
| fig 6666666.474<br>865.peg.28   | DNA polymerase I (EC 2.7.7.7)                                                                |      | -0.11   | 0.0603 | 0.177   | 0.348   | 0.453   | 0.82  | 0.119    | 0.00628  |
| fig 6666666.474<br>865.peg.764  | Respiratory nitrate reductase alpha chain (EC 1.7.99.4)                                      |      | -0.289  | 0.0596 | -0.899  | -0.551  | 0.156   | 0.891 | 7.99E-05 | 0.00395  |
| fig 6666666.474<br>865.peg.2613 | Exodeoxyribonuclease VII small subunit (EC 3.1.11.6)                                         |      | -1.4    | 0.0583 | -2.53   | -1.07   | 0.00125 | 0.943 | 9.60E-07 | 0.00164  |

|                                 |                                                                                                                 |     |         |        |          |         |         |       |          |          |
|---------------------------------|-----------------------------------------------------------------------------------------------------------------|-----|---------|--------|----------|---------|---------|-------|----------|----------|
| fig 6666666.474<br>865.peg.2087 | Ribonuclease J1 (endonuclease and 5' exonuclease)                                                               |     | -0.183  | 0.0581 | 0.000467 | 0.242   | 0.313   | 0.865 | 0.997    | 0.0985   |
| fig 6666666.474<br>865.peg.2284 | FIG006542: Phosphoesterase                                                                                      |     | -0.252  | 0.0581 | -1.04    | -0.727  | 0.243   | 0.903 | 3.58E-05 | 0.000901 |
| fig 6666666.474<br>865.peg.816  | DUF1801 domain-containing protein                                                                               |     | -0.55   | 0.0581 | -0.213   | 0.394   | 0.0393  | 0.918 | 0.307    | 0.062    |
| fig 6666666.474<br>865.peg.574  | SSU ribosomal protein S9p (S16e)                                                                                |     | 0.0943  | 0.0576 | -0.743   | -0.78   | 0.726   | 0.914 | 0.0016   | 0.00135  |
| fig 6666666.474<br>865.peg.2611 | Arginine pathway regulatory protein ArgR, repressor of arg regulon                                              |     | 0.271   | 0.0575 | 0.348    | 0.134   | 0.258   | 0.914 | 0.0782   | 0.506    |
| fig 6666666.474<br>865.peg.1412 | SSU ribosomal protein S6p                                                                                       |     | -0.0573 | 0.057  | -0.442   | -0.328  | 0.807   | 0.903 | 0.0138   | 0.0547   |
| fig 6666666.474<br>865.peg.533  | N-acetylglucosamine-1-phosphate uridyltransferase eukaryotic (EC 2.7.7.23)                                      |     | 0.415   | 0.0569 | 0.602    | 0.244   | 0.0207  | 0.861 | 0.000441 | 0.0777   |
| fig 6666666.474<br>865.peg.78   | UDP-N-acetylmuramate--alanine ligase (EC 6.3.2.8)                                                               |     | -0.102  | 0.0564 | 0.298    | 0.456   | 0.676   | 0.906 | 0.0922   | 0.0157   |
| fig 6666666.474<br>865.peg.1905 | Iron-sulfur cluster assembly protein SufD                                                                       |     | 0.239   | 0.0555 | 0.32     | 0.136   | 0.0967  | 0.831 | 0.01     | 0.232    |
| fig 6666666.474<br>865.peg.781  | L-Cystine ABC transporter, periplasmic cystine-binding protein TcyA                                             |     | 0.3     | 0.0554 | -0.00277 | -0.248  | 0.0755  | 0.863 | 0.988    | 0.0695   |
| fig 6666666.474<br>865.peg.582  | LSU ribosomal protein L17p                                                                                      |     | 0.259   | 0.0548 | -0.325   | -0.529  | 0.111   | 0.861 | 0.0181   | 0.00105  |
| fig 6666666.474<br>865.peg.915  | Delta-1-pyrroline-5-carboxylate dehydrogenase (EC 1.5.1.12)                                                     |     | 0.421   | 0.0539 | 0.342    | -0.0247 | 0.0481  | 0.906 | 0.047    | 0.891    |
| fig 6666666.474<br>865.peg.1846 | Prolipoprotein diacylglyceryl transferase (EC 2.4.99.-)                                                         | lgt | 0.108   | 0.0515 | 2.76     | 2.7     | 0.78    | 0.947 | 4.75E-07 | 9.29E-07 |
| fig 6666666.474<br>865.peg.1591 | Translation elongation factor G                                                                                 |     | 0.00525 | 0.0512 | -0.139   | -0.0936 | 0.967   | 0.809 | 0.132    | 0.319    |
| fig 6666666.474<br>865.peg.619  | RND multidrug efflux transporter; Acriflavin resistance protein                                                 |     | -0.231  | 0.0492 | -0.605   | -0.325  | 0.54    | 0.947 | 0.0388   | 0.255    |
| fig 6666666.474<br>865.peg.194  | Hypothetical protein SAV1845                                                                                    |     | -0.532  | 0.049  | -0.972   | -0.391  | 0.00602 | 0.898 | 8.68E-06 | 0.0104   |
| fig 6666666.474<br>865.peg.735  | Alcohol dehydrogenase (EC 1.1.1.1)                                                                              |     | 0.27    | 0.0484 | -0.245   | -0.467  | 0.0967  | 0.883 | 0.0608   | 0.00225  |
| fig 6666666.474<br>865.peg.2147 | Nucleoside 5-triphosphatase RdgB (dHATP, dITP, XTP-specific) (EC 3.6.1.15)                                      |     | -0.345  | 0.0482 | -0.659   | -0.266  | 0.201   | 0.943 | 0.00668  | 0.225    |
| fig 6666666.474<br>865.peg.1549 | possible tetrapyrrole methyltransferase domain / Nucleoside triphosphate pyrophosphohydrolase MazG (EC 3.6.1.8) |     | -0.39   | 0.0471 | -0.194   | 0.244   | 0.16    | 0.943 | 0.401    | 0.286    |
| fig 6666666.474<br>865.peg.2637 | Glucokinase (EC 2.7.1.2)                                                                                        |     | -0.118  | 0.0453 | 0.561    | 0.724   | 0.691   | 0.943 | 0.016    | 0.00406  |
| fig 6666666.474<br>865.peg.2092 | Pyruvate dehydrogenase E1 component beta subunit (EC 1.2.4.1)                                                   |     | 0.00411 | 0.0431 | 0.0127   | 0.0517  | 0.98    | 0.898 | 0.932    | 0.699    |
| fig 6666666.474<br>865.peg.1164 | Protein A, von Willebrand factor binding protein Spa                                                            | spa | -0.408  | 0.0422 | -1.79    | -1.34   | 0.00781 | 0.882 | 1.34E-09 | 9.21E-08 |
| fig 6666666.474<br>865.peg.1186 | Predicted cell-wall-anchored protein SasD (LPXAG motif)                                                         |     | -2.93   | 0.0422 | -2.32    | 0.654   | 0.00499 | 0.985 | 0.00516  | 0.389    |

|                                 |                                                                                      |  |         |        |         |        |         |       |          |          |
|---------------------------------|--------------------------------------------------------------------------------------|--|---------|--------|---------|--------|---------|-------|----------|----------|
| fig 6666666.474<br>865.peg.1564 | Pyridoxine biosynthesis glutamine amidotransferase, glutaminase subunit (EC 2.4.2.-) |  | -0.171  | 0.0417 | 0.0243  | 0.237  | 0.563   | 0.946 | 0.928    | 0.294    |
| fig 6666666.474<br>865.peg.97   | Hypothetical protein SAV1752                                                         |  | -0.509  | 0.0401 | -1      | -0.453 | 0.13    | 0.956 | 0.00169  | 0.0974   |
| fig 6666666.474<br>865.peg.732  | Putative glycosyl/glycerophosphate transferase in teichoic acid biosynthesis         |  | -0.506  | 0.0399 | 0.0686  | 0.614  | 0.161   | 0.956 | 0.846    | 0.0431   |
| fig 6666666.474<br>865.peg.595  | SSU ribosomal protein S8p (S15Ae)                                                    |  | 0.135   | 0.0392 | -0.491  | -0.587 | 0.427   | 0.911 | 0.00151  | 0.000506 |
| fig 6666666.474<br>865.peg.2602 | Peptidase T (EC 3.4.11.4)                                                            |  | -0.382  | 0.0383 | -0.179  | 0.241  | 0.0223  | 0.912 | 0.164    | 0.0631   |
| fig 6666666.474<br>865.peg.1561 | Lysyl-tRNA synthetase (class II) (EC 6.1.1.6)                                        |  | -0.0684 | 0.0369 | 0.158   | 0.263  | 0.643   | 0.899 | 0.14     | 0.0201   |
| fig 6666666.474<br>865.peg.688  | Dehydrogenase                                                                        |  | -1.43   | 0.0366 | -3.62   | -2.15  | 0.144   | 0.985 | 0.000306 | 0.012    |
| fig 6666666.474<br>865.peg.1301 | 2-C-methyl-D-erythritol 4-phosphate cytidyltransferase (EC 2.7.7.60)                 |  | 0.109   | 0.0363 | 0.977   | 0.904  | 0.726   | 0.954 | 0.000642 | 0.00139  |
| fig 6666666.474<br>865.peg.102  | Rhodanese-like domain protein                                                        |  | -0.244  | 0.0357 | -1.02   | -0.742 | 0.232   | 0.943 | 2.62E-05 | 0.000526 |
| fig 6666666.474<br>865.peg.1931 | NADH dehydrogenase (EC 1.6.99.3)                                                     |  | 0.242   | 0.0355 | 0.261   | 0.0544 | 0.15    | 0.926 | 0.0578   | 0.711    |
| fig 6666666.474<br>865.peg.2460 | FIG01108403: hypothetical protein                                                    |  | 0.00548 | 0.0355 | -0.401  | -0.371 | 0.98    | 0.943 | 0.022    | 0.034    |
| fig 6666666.474<br>865.peg.1955 | Signal peptidase I (EC 3.4.21.89)                                                    |  | 0.893   | 0.0346 | 1.66    | 0.805  | 0.00999 | 0.956 | 1.52E-05 | 0.00494  |
| fig 6666666.474<br>865.peg.989  | Transcriptional regulator, MarR family                                               |  | -0.318  | 0.0337 | 0.71    | 1.06   | 0.773   | 0.985 | 0.38     | 0.179    |
| fig 6666666.474<br>865.peg.1185 | Manganese superoxide dismutase (EC 1.15.1.1); Superoxide dismutase                   |  | -0.501  | 0.0331 | -1.08   | -0.541 | 0.0315  | 0.947 | 3.59E-05 | 0.00744  |
| fig 6666666.474<br>865.peg.1109 | Glycerophosphoryl diester phosphodiesterase (EC 3.1.4.46)                            |  | -0.463  | 0.0327 | -1.04   | -0.544 | 0.726   | 0.986 | 0.296    | 0.6      |
| fig 6666666.474<br>865.peg.26   | Dephospho-CoA kinase (EC 2.7.1.24)                                                   |  | -0.0101 | 0.0327 | 0.245   | 0.288  | 0.966   | 0.943 | 0.1      | 0.057    |
| fig 6666666.474<br>865.peg.1616 | Phosphoglycolate phosphatase (EC 3.1.3.18)                                           |  | 0.609   | 0.0323 | -1.76   | -2.33  | 0.526   | 0.985 | 0.0218   | 0.00493  |
| fig 6666666.474<br>865.peg.2222 | Dihydroxyacetone kinase family protein                                               |  | -0.144  | 0.0317 | -0.0813 | 0.0947 | 0.433   | 0.943 | 0.599    | 0.519    |
| fig 6666666.474<br>865.peg.82   | FIG009688: Thioredoxin                                                               |  | -0.183  | 0.0314 | -0.534  | -0.32  | 0.547   | 0.956 | 0.0264   | 0.167    |
| fig 6666666.474<br>865.peg.1168 | Siderophore staphylobactin ABC transporter, substrate-binding protein SirA           |  | -0.0438 | 0.0313 | -1.09   | -1.02  | 0.84    | 0.943 | 6.62E-06 | 2.49E-05 |
| fig 6666666.474<br>865.peg.205  | tRNA (cytidine(34)-2'-O)-methyltransferase (EC 2.1.1.207)                            |  | -0.797  | 0.03   | -1.2    | -0.371 | 0.46    | 0.985 | 0.152    | 0.677    |
| fig 6666666.474<br>865.peg.1403 | 5-methyltetrahydropteroyltriglutamate--homocysteine methyltransferase (EC 2.1.1.14)  |  | 0.171   | 0.0296 | -0.147  | -0.289 | 0.868   | 0.985 | 0.859    | 0.699    |
| fig 6666666.474<br>865.peg.2235 | 16S rRNA processing protein RimM                                                     |  | 0.102   | 0.0293 | -0.53   | -0.602 | 0.789   | 0.969 | 0.0578   | 0.0357   |

|                                 |                                                                                                                   |      |         |        |         |         |         |       |          |          |
|---------------------------------|-------------------------------------------------------------------------------------------------------------------|------|---------|--------|---------|---------|---------|-------|----------|----------|
| fig/6666666.474<br>865.peg.1080 | Chromosomal replication initiator protein DnaA                                                                    |      | 0.193   | 0.0276 | -0.399  | -0.565  | 0.436   | 0.956 | 0.0416   | 0.00783  |
| fig/6666666.474<br>865.peg.443  | D-alanine--D-alanine ligase (EC 6.3.2.4)                                                                          |      | 0.0587  | 0.0271 | 0.804   | 0.772   | 0.776   | 0.947 | 7.99E-05 | 0.000173 |
| fig/6666666.474<br>865.peg.996  | Arginine deiminase (EC 3.5.3.6)                                                                                   |      | -2.63   | 0.0267 | 0.0738  | 2.73    | 0.00245 | 0.985 | 0.921    | 0.000453 |
| fig/6666666.474<br>865.peg.1861 | 2,3-bisphosphoglycerate-independent phosphoglycerate mutase (EC 5.4.2.1)                                          |      | -0.166  | 0.0243 | -0.305  | -0.114  | 0.382   | 0.951 | 0.0451   | 0.451    |
| fig/6666666.474<br>865.peg.1631 | Phosphate acetyltransferase (EC 2.3.1.8)                                                                          |      | 0.00895 | 0.0241 | -0.62   | -0.605  | 0.962   | 0.937 | 2.60E-05 | 5.25E-05 |
| fig/6666666.474<br>865.peg.1823 | UDP-N-acetylenolpyruvoylglucosamine reductase (EC 1.1.1.158)                                                      | murB | -0.109  | 0.0241 | -0.0681 | 0.0646  | 0.685   | 0.962 | 0.768    | 0.764    |
| fig/6666666.474<br>865.peg.587  | Translation initiation factor 1                                                                                   |      | -0.156  | 0.024  | -0.973  | -0.793  | 0.567   | 0.964 | 0.000245 | 0.0015   |
| fig/6666666.474<br>865.peg.492  | spermine/spermidine acetyltransferase blt                                                                         |      | -0.354  | 0.0229 | -0.255  | 0.122   | 0.471   | 0.985 | 0.529    | 0.768    |
| fig/6666666.474<br>865.peg.428  | Serine phosphatase RsbU, regulator of sigma subunit                                                               |      | -0.0908 | 0.0228 | 0.329   | 0.443   | 0.798   | 0.971 | 0.202    | 0.0868   |
| fig/6666666.474<br>865.peg.467  | ATP synthase alpha chain (EC 3.6.3.14)                                                                            |      | -0.0856 | 0.0218 | -0.0281 | 0.0793  | 0.54    | 0.943 | 0.827    | 0.466    |
| fig/6666666.474<br>865.peg.468  | ATP synthase delta chain (EC 3.6.3.14)                                                                            |      | 0.325   | 0.0208 | 0.228   | -0.0757 | 0.162   | 0.969 | 0.23     | 0.712    |
| fig/6666666.474<br>865.peg.13   | ATP-dependent Clp protease ATP-binding subunit ClpX                                                               |      | 0.0608  | 0.0205 | -0.0208 | -0.061  | 0.716   | 0.948 | 0.89     | 0.636    |
| fig/6666666.474<br>865.peg.22   | Helicase loader DnaI                                                                                              |      | 0.196   | 0.0197 | 0.66    | 0.485   | 0.563   | 0.979 | 0.0155   | 0.0624   |
| fig/6666666.474<br>865.peg.583  | DNA-directed RNA polymerase alpha subunit (EC 2.7.7.6)                                                            |      | 0.0955  | 0.0193 | -0.0853 | -0.161  | 0.518   | 0.947 | 0.468    | 0.154    |
| fig/6666666.474<br>865.peg.1908 | Iron-sulfur cluster assembly protein SufB                                                                         |      | 0.01    | 0.0185 | 0.3     | 0.308   | 0.962   | 0.951 | 0.0133   | 0.012    |
| fig/6666666.474<br>865.peg.609  | LSU ribosomal protein L3p (L3e)                                                                                   |      | 0.0119  | 0.0184 | -0.507  | -0.501  | 0.963   | 0.964 | 0.00405  | 0.00469  |
| fig/6666666.474<br>865.peg.2246 | DNA topoisomerase I (EC 5.99.1.2)                                                                                 |      | 0.384   | 0.0179 | -0.133  | -0.498  | 0.108   | 0.969 | 0.508    | 0.0148   |
| fig/6666666.474<br>865.peg.2188 | Cell division initiation protein DivIVA                                                                           |      | -0.404  | 0.0171 | -0.736  | -0.315  | 0.126   | 0.976 | 0.00277  | 0.14     |
| fig/6666666.474<br>865.peg.2485 | Asparaginyl-tRNA synthetase (EC 6.1.1.22)                                                                         |      | -0.1    | 0.017  | -0.0967 | 0.0204  | 0.489   | 0.956 | 0.396    | 0.872    |
| fig/6666666.474<br>865.peg.662  | Glyoxylate reductase (EC 1.1.1.79) / Glyoxylate reductase (EC 1.1.1.26) / Hydroxypyruvate reductase (EC 1.1.1.81) |      | -0.217  | 0.017  | -0.126  | 0.109   | 0.13    | 0.956 | 0.277    | 0.355    |
| fig/6666666.474<br>865.peg.21   | Threonyl-tRNA synthetase (EC 6.1.1.3)                                                                             |      | -0.315  | 0.0169 | -0.444  | -0.112  | 0.0456  | 0.956 | 0.00224  | 0.377    |
| fig/6666666.474<br>865.peg.2590 | 3-oxoacyl-[acyl-carrier protein] reductase paralog (EC 1.1.1.100)                                                 |      | 1.29    | 0.0159 | 0.21    | -1.06   | 0.111   | 0.987 | 0.787    | 0.103    |
| fig/6666666.474<br>865.peg.54   | Septation ring formation regulator EzrA                                                                           |      | -0.349  | 0.0155 | -1.06   | -0.695  | 0.0258  | 0.96  | 1.24E-06 | 7.30E-05 |

|                                 |                                                                                                                         |      |         |          |         |          |        |       |          |          |
|---------------------------------|-------------------------------------------------------------------------------------------------------------------------|------|---------|----------|---------|----------|--------|-------|----------|----------|
| fig/6666666.474<br>865.peg.2270 | Polyribonucleotide nucleotidyltransferase (EC 2.7.7.8)                                                                  |      | 0.152   | 0.0154   | 0.18    | 0.0438   | 0.352  | 0.964 | 0.169    | 0.761    |
| fig/6666666.474<br>865.peg.1453 | FIG01108201: hypothetical protein                                                                                       |      | -0.0119 | 0.015    | -0.928  | -0.901   | 0.975  | 0.985 | 0.00425  | 0.00549  |
| fig/6666666.474<br>865.peg.1454 | Xanthine phosphoribosyltransferase (EC 2.4.2.22)                                                                        |      | 0.423   | 0.0144   | 0.0855  | -0.324   | 0.0257 | 0.969 | 0.59     | 0.034    |
| fig/6666666.474<br>865.peg.539  | Heme ABC type transporter HtsABC, heme-binding protein                                                                  |      | 1.57    | 0.0132   | -0.723  | -2.28    | 0.15   | 0.993 | 0.428    | 0.0168   |
| fig/6666666.474<br>865.peg.1922 | D-alanine--poly(phosphoribitol) ligase subunit 1 (EC 6.1.1.13)                                                          |      | 0.121   | 0.0128   | -0.376  | -0.484   | 0.489  | 0.969 | 0.0101   | 0.00233  |
| fig/6666666.474<br>865.peg.2053 | Cell envelope-associated transcriptional attenuator LytR-CpsA-Psr, subfamily F2 (as in PMID19099556)                    |      | 0.299   | 0.0128   | 1.05    | 0.768    | 0.243  | 0.985 | 0.000132 | 0.002    |
| fig/6666666.474<br>865.peg.1076 | tRNA uridine 5-carboxymethylaminomethyl modification enzyme GidA                                                        |      | 0.463   | 0.0115   | 0.595   | 0.144    | 0.108  | 0.985 | 0.0148   | 0.55     |
| fig/6666666.474<br>865.peg.2252 | SSU ribosomal protein S2p (SAe)                                                                                         |      | 0.188   | 0.0112   | -0.0372 | -0.214   | 0.153  | 0.969 | 0.771    | 0.0517   |
| fig/6666666.474<br>865.peg.2304 | Glutamine synthetase type I (EC 6.3.1.2)                                                                                | glnA | -0.132  | 0.0107   | -0.142  | 0.000434 | 0.338  | 0.969 | 0.199    | 0.996    |
| fig/6666666.474<br>865.peg.1521 | DNA polymerase III subunits gamma and tau (EC 2.7.7.7)                                                                  |      | 0.796   | 0.0091   | 0.219   | -0.567   | 0.15   | 0.99  | 0.66     | 0.203    |
| fig/6666666.474<br>865.peg.1375 | FIG01108282: hypothetical protein                                                                                       |      | -0.388  | 0.00898  | -0.352  | 0.0448   | 0.0781 | 0.985 | 0.0494   | 0.824    |
| fig/6666666.474<br>865.peg.1600 | Deoxyadenosine kinase (EC 2.7.1.76) / Deoxyguanosine kinase (EC 2.7.1.113)                                              |      | -0.102  | 0.00828  | 0.319   | 0.429    | 0.792  | 0.987 | 0.259    | 0.131    |
| fig/6666666.474<br>865.peg.50   | Thiol peroxidase, Tpx-type (EC 1.11.1.15)                                                                               |      | 0.0341  | 0.00756  | 0.0574  | 0.0309   | 0.893  | 0.985 | 0.768    | 0.87     |
| fig/6666666.474<br>865.peg.182  | Uroporphyrinogen III decarboxylase (EC 4.1.1.37)                                                                        |      | -0.093  | 0.0071   | -0.468  | -0.368   | 0.643  | 0.985 | 0.00409  | 0.0172   |
| fig/6666666.474<br>865.peg.2435 | Tellurite resistance protein                                                                                            |      | 0.21    | 0.00635  | 1.07    | 0.87     | 0.187  | 0.985 | 1.88E-06 | 2.49E-05 |
| fig/6666666.474<br>865.peg.1285 | L-lactate dehydrogenase (EC 1.1.1.27)                                                                                   |      | 0.412   | 0.00612  | 0.271   | -0.135   | 0.0202 | 0.985 | 0.0499   | 0.326    |
| fig/6666666.474<br>865.peg.545  | alkaline shock protein 23                                                                                               |      | -0.0799 | 0.00594  | -0.696  | -0.61    | 0.812  | 0.987 | 0.00794  | 0.0172   |
| fig/6666666.474<br>865.peg.204  | Hypothetical protein SAV1854                                                                                            |      | -0.0978 | 0.00465  | -0.369  | -0.267   | 0.678  | 0.987 | 0.0348   | 0.12     |
| fig/6666666.474<br>865.peg.252  | Aspartyl-tRNA(Asn) amidotransferase subunit C (EC 6.3.5.6) @ Glutamyl-tRNA(Gln) amidotransferase subunit C (EC 6.3.5.7) |      | -0.156  | 0.00461  | -1.17   | -1.01    | 0.504  | 0.987 | 1.54E-05 | 7.93E-05 |
| fig/6666666.474<br>865.peg.2082 | Phosphoenolpyruvate-protein phosphotransferase of PTS system (EC 2.7.3.9)                                               |      | -0.108  | 0.00392  | -0.222  | -0.11    | 0.448  | 0.985 | 0.0476   | 0.323    |
| fig/6666666.474<br>865.peg.2019 | Serine protease, DegP/HtrA, do-like (EC 3.4.21.-)                                                                       |      | 0.973   | 0.00366  | -0.283  | -1.25    | 0.108  | 0.998 | 0.59     | 0.0157   |
| fig/6666666.474<br>865.peg.546  | Hypothetical protein SAV2183                                                                                            |      | -1.6    | 0.00056  | 0.00847 | 1.61     | 0.113  | 0.999 | 0.995    | 0.0522   |
| fig/6666666.474<br>865.peg.2703 | Uridine kinase (EC 2.7.1.48) [C1]                                                                                       |      | 0.503   | -0.00042 | 0.342   | -0.162   | 0.185  | 0.999 | 0.268    | 0.617    |

|                                 |                                                                                                                    |      |         |          |         |         |          |       |          |          |
|---------------------------------|--------------------------------------------------------------------------------------------------------------------|------|---------|----------|---------|---------|----------|-------|----------|----------|
| fig 6666666.474<br>865.peg.2074 | Transmembrane component YkoC of energizing module of thiamin-regulated ECF transporter for HydroxyMethylPyrimidine |      | 0.366   | -0.00044 | 1.66    | 1.29    | 0.687    | 0.999 | 0.0174   | 0.0547   |
| fig 6666666.474<br>865.peg.196  | HTH domain protein SA1665, binds to mecA promoter region                                                           |      | -0.0935 | -0.00072 | 0.19    | 0.283   | 0.738    | 0.999 | 0.375    | 0.179    |
| fig 6666666.474<br>865.peg.281  | Thioredoxin                                                                                                        |      | 0.0298  | -0.00141 | 0.682   | 0.651   | 0.926    | 0.998 | 0.00359  | 0.00502  |
| fig 6666666.474<br>865.peg.683  | Transcriptional regulator, RpiR family                                                                             |      | -0.664  | -0.00146 | 0.872   | 1.54    | 0.183    | 0.999 | 0.0351   | 0.00164  |
| fig 6666666.474<br>865.peg.1587 | DNA-directed RNA polymerase beta' subunit (EC 2.7.7.6)                                                             |      | 0.0222  | -0.00151 | -0.34   | -0.363  | 0.868    | 0.992 | 0.0016   | 0.00118  |
| fig 6666666.474<br>865.peg.2251 | GTP-sensing transcriptional pleiotropic repressor codY                                                             | codY | 0.398   | -0.00196 | 0.374   | -0.0258 | 0.0456   | 0.994 | 0.0226   | 0.884    |
| fig 6666666.474<br>865.peg.264  | NAD synthetase (EC 6.3.1.5)                                                                                        |      | -0.226  | -0.00407 | -0.36   | -0.138  | 0.232    | 0.987 | 0.0242   | 0.377    |
| fig 6666666.474<br>865.peg.2081 | Phosphocarrier protein of PTS system                                                                               |      | -0.343  | -0.00457 | -0.277  | 0.0611  | 0.24     | 0.99  | 0.245    | 0.823    |
| fig 6666666.474<br>865.peg.2268 | Riboflavin kinase (EC 2.7.1.26) / FMN adenylyltransferase (EC 2.7.7.2)                                             |      | -0.0113 | -0.00585 | 0.843   | 0.849   | 0.965    | 0.985 | 7.96E-05 | 0.000108 |
| fig 6666666.474<br>865.peg.2453 | Peptide methionine sulfoxide reductase MsrB (EC 1.8.4.12)                                                          | mrsB | 1.13    | -0.00718 | 3.56    | 2.42    | 0.000364 | 0.985 | 3.76E-10 | 9.21E-08 |
| fig 6666666.474<br>865.peg.1592 | Translation elongation factor Tu                                                                                   |      | 0.0245  | -0.00739 | 0.0128  | -0.0191 | 0.868    | 0.98  | 0.921    | 0.868    |
| fig 6666666.474<br>865.peg.610  | SSU ribosomal protein S10p (S20e)                                                                                  |      | 0.601   | -0.00938 | -0.432  | -1.04   | 0.0456   | 0.985 | 0.07     | 0.000564 |
| fig 6666666.474<br>865.peg.1918 | BH3430 unknown conserved protein                                                                                   |      | -0.694  | -0.00942 | -0.56   | 0.125   | 0.0972   | 0.987 | 0.0949   | 0.729    |
| fig 6666666.474<br>865.peg.1973 | 3-oxoacyl-[acyl-carrier-protein] synthase, KASIII (EC 2.3.1.180)                                                   |      | -0.154  | -0.00963 | -0.113  | 0.0314  | 0.536    | 0.985 | 0.584    | 0.884    |
| fig 6666666.474<br>865.peg.179  | Hypothetical protein SAV1831                                                                                       |      | -0.0398 | -0.00969 | 0.0236  | 0.0537  | 0.936    | 0.986 | 0.954    | 0.877    |
| fig 6666666.474<br>865.peg.213  | Thiol peroxidase, Bcp-type (EC 1.11.1.15)                                                                          |      | -0.356  | -0.0102  | -0.0523 | 0.294   | 0.102    | 0.985 | 0.801    | 0.0914   |
| fig 6666666.474<br>865.peg.1995 | Oligoendopeptidase F (EC 3.4.24.-)                                                                                 |      | -0.0109 | -0.0114  | 0.219   | 0.219   | 0.962    | 0.969 | 0.0626   | 0.0635   |
| fig 6666666.474<br>865.peg.2581 | Ribosomal large subunit pseudouridine synthase B (EC 4.2.1.70)                                                     |      | 0.728   | -0.0119  | 0.0355  | -0.705  | 0.0684   | 0.985 | 0.927    | 0.034    |
| fig 6666666.474<br>865.peg.1661 | Staphylococcal accessory regulator A (SarA)                                                                        | sarA | 0.599   | -0.0121  | 0.954   | 0.343   | 0.00862  | 0.98  | 4.73E-05 | 0.0448   |
| fig 6666666.474<br>865.peg.259  | Adenylosuccinate lyase (EC 4.3.2.2)                                                                                |      | -0.142  | -0.0122  | 0.294   | 0.424   | 0.313    | 0.969 | 0.0144   | 0.00172  |
| fig 6666666.474<br>865.peg.2024 | Lipoate-protein ligase A                                                                                           |      | -0.317  | -0.0128  | 0.42    | 0.725   | 0.156    | 0.98  | 0.0265   | 0.00118  |
| fig 6666666.474<br>865.peg.2670 | Chaperone protein DnaJ                                                                                             |      | 0.0202  | -0.0134  | 0.212   | 0.178   | 0.962    | 0.985 | 0.332    | 0.421    |
| fig 6666666.474<br>865.peg.1611 | FIG013761: LmbE family protein                                                                                     |      | 1.02    | -0.0148  | 0.373   | -0.664  | 0.0294   | 0.985 | 0.309    | 0.0721   |

|                                 |                                                                                                                                 |      |         |         |        |         |        |       |          |          |
|---------------------------------|---------------------------------------------------------------------------------------------------------------------------------|------|---------|---------|--------|---------|--------|-------|----------|----------|
| fig 6666666.474<br>865.peg.17   | LSU ribosomal protein L20p                                                                                                      |      | 0.114   | -0.0153 | -0.847 | -0.975  | 0.774  | 0.985 | 0.00714  | 0.00327  |
| fig 6666666.474<br>865.peg.1190 | Deoxyribose-phosphate aldolase (EC 4.1.2.4)                                                                                     |      | -0.451  | -0.0164 | -0.143 | 0.291   | 0.016  | 0.964 | 0.307    | 0.0434   |
| fig 6666666.474<br>865.peg.653  | Transcriptional regulator SarR (Staphylococcal accessory regulator R)                                                           |      | -0.514  | -0.0174 | -1.32  | -0.819  | 0.0258 | 0.969 | 5.55E-06 | 0.000434 |
| fig 6666666.474<br>865.peg.1543 | N-acetylglucosamine-1-phosphate uridyltransferase (EC 2.7.7.23) /<br>Glucosamine-1-phosphate N-acetyltransferase (EC 2.3.1.157) | glmU | -0.352  | -0.0184 | -0.728 | -0.395  | 0.27   | 0.98  | 0.00987  | 0.131    |
| fig 6666666.474<br>865.peg.2657 | GTP-binding protein Era                                                                                                         |      | -0.461  | -0.0192 | 0.157  | 0.599   | 0.0657 | 0.969 | 0.443    | 0.00674  |
| fig 6666666.474<br>865.peg.613  | DNA topoisomerase III (EC 5.99.1.2)                                                                                             |      | -0.0583 | -0.0197 | 0.104  | 0.143   | 0.871  | 0.976 | 0.714    | 0.574    |
| fig 6666666.474<br>865.peg.2655 | Glycyl-tRNA synthetase (EC 6.1.1.14)                                                                                            |      | -0.231  | -0.0199 | 0.711  | 0.923   | 0.118  | 0.948 | 3.40E-05 | 6.21E-06 |
| fig 6666666.474<br>865.peg.2296 | Aerobic glycerol-3-phosphate dehydrogenase (EC 1.1.5.3)                                                                         |      | -0.231  | -0.0201 | 1.02   | 1.23    | 0.331  | 0.969 | 8.79E-05 | 3.41E-05 |
| fig 6666666.474<br>865.peg.597  | LSU ribosomal protein L5p (L11e)                                                                                                |      | 0.186   | -0.0213 | -0.351 | -0.559  | 0.166  | 0.946 | 0.00451  | 0.000203 |
| fig 6666666.474<br>865.peg.39   | NADP-dependent malic enzyme (EC 1.1.1.40)                                                                                       |      | -0.0657 | -0.0227 | -0.229 | -0.186  | 0.732  | 0.953 | 0.111    | 0.194    |
| fig 6666666.474<br>865.peg.2710 | Alanyl-tRNA synthetase (EC 6.1.1.7)                                                                                             |      | -0.304  | -0.0228 | -0.305 | -0.0243 | 0.0645 | 0.947 | 0.0241   | 0.87     |
| fig 6666666.474<br>865.peg.2624 | Rhodanese-like domain protein                                                                                                   |      | 0.139   | -0.0231 | -0.727 | -0.889  | 0.643  | 0.969 | 0.00347  | 0.000989 |
| fig 6666666.474<br>865.peg.2647 | Endonuclease IV (EC 3.1.21.2)                                                                                                   |      | 0.0334  | -0.0237 | 0.237  | 0.179   | 0.938  | 0.971 | 0.38     | 0.513    |
| fig 6666666.474<br>865.peg.192  | DNA double-strand break repair Rad50 ATPase                                                                                     |      | -0.182  | -0.024  | -0.795 | -0.637  | 0.39   | 0.956 | 0.000214 | 0.00153  |
| fig 6666666.474<br>865.peg.2181 | Cell division protein FtsA                                                                                                      |      | 0.0116  | -0.0243 | 0.618  | 0.582   | 0.962  | 0.946 | 0.000192 | 0.000447 |
| fig 6666666.474<br>865.peg.1545 | LSU ribosomal protein L25p                                                                                                      |      | 0.0886  | -0.0244 | 0.489  | 0.376   | 0.598  | 0.943 | 0.00107  | 0.0067   |
| fig 6666666.474<br>865.peg.1893 | Arsenate reductase (EC 1.20.4.1)                                                                                                |      | 0.0151  | -0.0253 | 0.532  | 0.492   | 0.94   | 0.943 | 0.000478 | 0.0011   |
| fig 6666666.474<br>865.peg.1590 | SSU ribosomal protein S7p (S5e)                                                                                                 |      | 0.645   | -0.0263 | -0.445 | -1.12   | 0.0116 | 0.956 | 0.0226   | 5.59E-05 |
| fig 6666666.474<br>865.peg.1586 | DNA-directed RNA polymerase beta subunit (EC 2.7.7.6)                                                                           |      | 0.00294 | -0.0267 | -0.52  | -0.55   | 0.981  | 0.918 | 7.99E-05 | 7.30E-05 |
| fig 6666666.474<br>865.peg.465  | ATP synthase beta chain (EC 3.6.3.14)                                                                                           |      | -0.102  | -0.0284 | -0.139 | -0.0655 | 0.342  | 0.904 | 0.107    | 0.456    |
| fig 6666666.474<br>865.peg.241  | Putative amidotransferase similar to cobyric acid synthase                                                                      |      | 0.444   | -0.0299 | 0.713  | 0.239   | 0.0432 | 0.947 | 7.00E-04 | 0.164    |
| fig 6666666.474<br>865.peg.906  | Hydroxymethylglutaryl-CoA synthase (EC 2.3.3.10)                                                                                |      | 0.05    | -0.0299 | -0.043 | -0.123  | 0.724  | 0.914 | 0.723    | 0.235    |
| fig 6666666.474<br>865.peg.1081 | DNA polymerase III beta subunit (EC 2.7.7.7)                                                                                    |      | -0.0283 | -0.0302 | 0.177  | 0.176   | 0.893  | 0.943 | 0.199    | 0.202    |



|                                 |                                                                                                                                                                                   |      |         |         |         |          |        |       |          |          |
|---------------------------------|-----------------------------------------------------------------------------------------------------------------------------------------------------------------------------------|------|---------|---------|---------|----------|--------|-------|----------|----------|
| fig 6666666.474<br>865.peg.2133 | FIG011178: rRNA methylase                                                                                                                                                         |      | -0.994  | -0.0307 | -0.967  | -0.00356 | 0.338  | 0.985 | 0.246    | 0.996    |
| fig 6666666.474<br>865.peg.1859 | Phosphoglycerate kinase (EC 2.7.2.3)                                                                                                                                              |      | -0.0265 | -0.0312 | 0.0578  | 0.0531   | 0.866  | 0.912 | 0.617    | 0.632    |
| fig 6666666.474<br>865.peg.1006 | Isochorismatase (EC 3.3.2.1)                                                                                                                                                      |      | -0.37   | -0.0315 | 0.115   | 0.453    | 0.187  | 0.956 | 0.649    | 0.052    |
| fig 6666666.474<br>865.peg.1813 | NADPH dependent preQ0 reductase (EC 1.7.1.13)                                                                                                                                     |      | -2.03   | -0.0321 | -0.568  | 1.43     | 0.102  | 0.986 | 0.595    | 0.148    |
| fig 6666666.474<br>865.peg.1284 | Flavohepotein (Hemoglobin-like protein) (Flavohepotein) (Nitric oxide dioxygenase) (EC 1.14.12.17)                                                                                |      | -0.762  | -0.0329 | -0.136  | 0.592    | 0.0025 | 0.946 | 0.45     | 0.00339  |
| fig 6666666.474<br>865.peg.2233 | Signal recognition particle, subunit Ffh SRP54 (TC 3.A.5.1.1)                                                                                                                     |      | -0.181  | -0.0334 | -0.0332 | 0.115    | 0.455  | 0.947 | 0.884    | 0.56     |
| fig 6666666.474<br>865.peg.46   | Alanine dehydrogenase (EC 1.4.1.1)                                                                                                                                                |      | -0.922  | -0.0334 | -0.978  | -0.089   | 0.191  | 0.985 | 0.0925   | 0.89     |
| fig 6666666.474<br>865.peg.1096 | Adenylosuccinate synthetase (EC 6.3.4.4)                                                                                                                                          |      | -0.164  | -0.0337 | -0.669  | -0.539   | 0.293  | 0.925 | 8.79E-05 | 0.000693 |
| fig 6666666.474<br>865.peg.1443 | phosphoglycerate mutase family protein                                                                                                                                            |      | -0.247  | -0.0344 | 0.247   | 0.46     | 0.554  | 0.969 | 0.45     | 0.148    |
| fig 6666666.474<br>865.peg.248  | Transcription regulator [contains diacylglycerol kinase catalytic domain]                                                                                                         |      | -0.24   | -0.0353 | -0.517  | -0.312   | 0.423  | 0.956 | 0.0302   | 0.177    |
| fig 6666666.474<br>865.peg.2601 | 6-phosphogluconate dehydrogenase, decarboxylating (EC 1.1.1.44)                                                                                                                   |      | 0.0271  | -0.0358 | 0.449   | 0.386    | 0.873  | 0.908 | 0.0013   | 0.00408  |
| fig 6666666.474<br>865.peg.570  | Alpha-acetolactate decarboxylase (EC 4.1.1.5)                                                                                                                                     |      | -0.621  | -0.0363 | -0.0552 | 0.53     | 0.0258 | 0.948 | 0.831    | 0.0203   |
| fig 6666666.474<br>865.peg.243  | Ferritin-like protein 2                                                                                                                                                           |      | -0.573  | -0.037  | -0.477  | 0.0593   | 0.0172 | 0.943 | 0.0138   | 0.766    |
| fig 6666666.474<br>865.peg.73   | Catabolite control protein A                                                                                                                                                      |      | -0.138  | -0.0374 | -0.0588 | 0.0417   | 0.476  | 0.933 | 0.734    | 0.805    |
| fig 6666666.474<br>865.peg.2582 | Segregation and condensation protein B                                                                                                                                            | scpB | 0.706   | -0.0385 | 1.55    | 0.807    | 0.298  | 0.98  | 0.00905  | 0.141    |
| fig 6666666.474<br>865.peg.490  | CTP synthase (EC 6.3.4.2)                                                                                                                                                         |      | 0.113   | -0.0396 | 0.168   | 0.0162   | 0.554  | 0.921 | 0.246    | 0.918    |
| fig 6666666.474<br>865.peg.2272 | Cell division protein FtsK                                                                                                                                                        |      | 0.121   | -0.04   | -0.0962 | -0.258   | 0.893  | 0.981 | 0.892    | 0.684    |
| fig 6666666.474<br>865.peg.2385 | Topoisomerase IV subunit A (EC 5.99.1.-)                                                                                                                                          |      | -0.28   | -0.04   | 0.116   | 0.356    | 0.459  | 0.956 | 0.733    | 0.221    |
| fig 6666666.474<br>865.peg.1222 | FIG01108032: hypothetical protein                                                                                                                                                 |      | 0.378   | -0.0402 | 0.133   | -0.285   | 0.55   | 0.975 | 0.819    | 0.568    |
| fig 6666666.474<br>865.peg.1785 | PTS system, fructose-specific IIA component (EC 2.7.1.69) / PTS system, fructose-specific IIB component (EC 2.7.1.69) / PTS system, fructose-specific IIC component (EC 2.7.1.69) |      | 0.112   | -0.0409 | 0.133   | -0.0203  | 0.691  | 0.943 | 0.548    | 0.925    |
| fig 6666666.474<br>865.peg.1457 | GMP synthase                                                                                                                                                                      |      | 0.0548  | -0.042  | 0.201   | 0.104    | 0.691  | 0.861 | 0.0503   | 0.306    |
| fig 6666666.474<br>865.peg.2281 | RecA protein                                                                                                                                                                      |      | -0.118  | -0.0434 | -0.47   | -0.395   | 0.433  | 0.884 | 0.00087  | 0.00335  |

|                                 |                                                                                           |      |          |         |         |         |        |       |          |          |
|---------------------------------|-------------------------------------------------------------------------------------------|------|----------|---------|---------|---------|--------|-------|----------|----------|
| fig/6666666.474<br>865.peg.1851 | FIG002813: LPPG:FO 2-phospho-L-lactate transferase like, CofD-like                        |      | -0.142   | -0.0436 | 0.66    | 0.759   | 0.68   | 0.947 | 0.0138   | 0.0067   |
| fig/6666666.474<br>865.peg.707  | Isopentenyl-diphosphate delta-isomerase, FMN-dependent (EC 5.3.3.2)                       |      | -0.162   | -0.0441 | -0.0133 | 0.105   | 0.587  | 0.943 | 0.961    | 0.659    |
| fig/6666666.474<br>865.peg.2580 | Staphylococcal respiratory response protein SrrA                                          | srrA | -0.224   | -0.0444 | -0.45   | -0.27   | 0.384  | 0.943 | 0.0304   | 0.179    |
| fig/6666666.474<br>865.peg.1450 | L-cystine uptake protein TcyP                                                             |      | -0.54    | -0.0445 | -0.379  | 0.117   | 0.192  | 0.959 | 0.263    | 0.755    |
| fig/6666666.474<br>865.peg.2104 | FIG01108286: hypothetical protein                                                         |      | -0.136   | -0.047  | 0.342   | 0.43    | 0.643  | 0.943 | 0.108    | 0.048    |
| fig/6666666.474<br>865.peg.2262 | Transcription termination protein NusA                                                    |      | 0.101    | -0.0476 | 0.271   | 0.123   | 0.639  | 0.906 | 0.078    | 0.428    |
| fig/6666666.474<br>865.peg.2186 | Cell division protein YlmG/Ycf19 (putative), YggT family                                  |      | 0.176    | -0.0484 | 1.74    | 1.52    | 0.812  | 0.971 | 0.00393  | 0.00929  |
| fig/6666666.474<br>865.peg.2679 | dCMP deaminase (EC 3.5.4.12); Late competence protein ComEB                               |      | -0.515   | -0.0487 | 0.332   | 0.798   | 0.27   | 0.96  | 0.39     | 0.0415   |
| fig/6666666.474<br>865.peg.2249 | ATP-dependent protease HslV (EC 3.4.25.-)                                                 | clpQ | 0.712    | -0.049  | 0.674   | -0.0872 | 0.0456 | 0.947 | 0.022    | 0.777    |
| fig/6666666.474<br>865.peg.2615 | Transcription termination protein NusB                                                    |      | 0.331    | -0.0495 | 1.25    | 0.87    | 0.287  | 0.943 | 0.000152 | 0.00296  |
| fig/6666666.474<br>865.peg.2111 | Pyruvate carboxylase (EC 6.4.1.1)                                                         |      | -0.554   | -0.0496 | -0.534  | -0.0303 | 0.0458 | 0.943 | 0.0204   | 0.898    |
| fig/6666666.474<br>865.peg.1534 | Putative deoxyribonuclease YcfH                                                           |      | -0.235   | -0.0506 | -0.433  | -0.248  | 0.351  | 0.933 | 0.036    | 0.218    |
| fig/6666666.474<br>865.peg.2508 | Thioredoxin reductase (EC 1.8.1.9)                                                        |      | 0.188    | -0.0508 | 0.534   | 0.295   | 0.443  | 0.925 | 0.0096   | 0.122    |
| fig/6666666.474<br>865.peg.80   | Phenylalanyl-tRNA synthetase domain protein (Bsu YtpR)                                    |      | 0.217    | -0.0508 | 0.284   | 0.0163  | 0.323  | 0.914 | 0.107    | 0.929    |
| fig/6666666.474<br>865.peg.2017 | Peptide chain release factor 3                                                            |      | 0.0415   | -0.0512 | -0.213  | -0.305  | 0.812  | 0.861 | 0.089    | 0.0201   |
| fig/6666666.474<br>865.peg.474  | Uracil phosphoribosyltransferase (EC 2.4.2.9)                                             |      | -0.204   | -0.0513 | -0.477  | -0.324  | 0.321  | 0.906 | 0.00792  | 0.0528   |
| fig/6666666.474<br>865.peg.96   | Acetylornithine deacetylase/Succinyl-diaminopimelate desuccinylase and related deacylases |      | -0.372   | -0.0517 | -0.373  | -0.0528 | 0.0565 | 0.903 | 0.0209   | 0.755    |
| fig/6666666.474<br>865.peg.2265 | Translation initiation factor 2                                                           |      | -0.059   | -0.0518 | 0.351   | 0.359   | 0.716  | 0.855 | 0.00714  | 0.0067   |
| fig/6666666.474<br>865.peg.64   | Serine protease, DegP/HtrA, do-like (EC 3.4.21.-)                                         |      | 0.345    | -0.0524 | 2.18    | 1.78    | 0.016  | 0.831 | 1.29E-10 | 2.67E-09 |
| fig/6666666.474<br>865.peg.524  | Uncharacterized secreted protein associated with spyDAC                                   |      | -0.00564 | -0.053  | -0.458  | -0.506  | 0.982  | 0.926 | 0.0286   | 0.0189   |
| fig/6666666.474<br>865.peg.2274 | FIG001621: Zinc protease                                                                  |      | 0.185    | -0.0531 | 0.0343  | -0.204  | 0.658  | 0.947 | 0.927    | 0.513    |
| fig/6666666.474<br>865.peg.1506 | Methionine ABC transporter substrate-binding protein                                      |      | 0.547    | -0.0535 | -1.55   | -2.16   | 0.108  | 0.943 | 4.79E-05 | 5.48E-06 |
| fig/6666666.474<br>865.peg.1808 | Biosynthetic Aromatic amino acid aminotransferase beta (EC 2.6.1.57)                      |      | 0.238    | -0.054  | 0.338   | 0.0465  | 0.442  | 0.943 | 0.159    | 0.868    |

|                                 |                                                                                                                                |  |         |         |         |         |          |       |          |          |
|---------------------------------|--------------------------------------------------------------------------------------------------------------------------------|--|---------|---------|---------|---------|----------|-------|----------|----------|
| fig/6666666.474<br>865.peg.2253 | Translation elongation factor Ts                                                                                               |  | 0.0556  | -0.0541 | -0.126  | -0.235  | 0.668    | 0.802 | 0.183    | 0.0188   |
| fig/6666666.474<br>865.peg.995  | Ornithine carbamoyltransferase (EC 2.1.3.3)                                                                                    |  | -2.05   | -0.0549 | 0.235   | 2.23    | 0.00175  | 0.962 | 0.629    | 0.000217 |
| fig/6666666.474<br>865.peg.1448 | Alkyl hydroperoxide reductase protein C (EC 1.6.4.-)                                                                           |  | -0.149  | -0.0552 | -0.618  | -0.524  | 0.27     | 0.826 | 5.87E-05 | 0.000314 |
| fig/6666666.474<br>865.peg.592  | SSU ribosomal protein S5p (S2e)                                                                                                |  | 0.276   | -0.0552 | -0.553  | -0.884  | 0.304    | 0.93  | 0.0158   | 0.000985 |
| fig/6666666.474<br>865.peg.2617 | Biotin carboxylase of acetyl-CoA carboxylase (EC 6.3.4.14)                                                                     |  | 0.174   | -0.0554 | 0.271   | 0.0414  | 0.428    | 0.904 | 0.11     | 0.832    |
| fig/6666666.474<br>865.peg.1533 | Methionyl-tRNA synthetase (EC 6.1.1.10)                                                                                        |  | -0.128  | -0.0564 | 0.217   | 0.288   | 0.475    | 0.864 | 0.117    | 0.0431   |
| fig/6666666.474<br>865.peg.2488 | tRNA nucleotidyltransferase (EC 2.7.7.21) (EC 2.7.7.25)                                                                        |  | 0.423   | -0.0566 | 0.469   | -0.0101 | 0.697    | 0.98  | 0.59     | 0.991    |
| fig/6666666.474<br>865.peg.392  | Nitroreductase family protein                                                                                                  |  | -0.897  | -0.0577 | -1.27   | -0.431  | 0.00602  | 0.934 | 8.01E-05 | 0.0696   |
| fig/6666666.474<br>865.peg.1782 | Cys-tRNA(Pro) deacylase YbaK                                                                                                   |  | -0.17   | -0.0579 | 0.459   | 0.572   | 0.772    | 0.956 | 0.278    | 0.176    |
| fig/6666666.474<br>865.peg.2323 | FIG01108053: hypothetical protein                                                                                              |  | 0.318   | -0.058  | -1.22   | -1.59   | 0.714    | 0.971 | 0.0578   | 0.0183   |
| fig/6666666.474<br>865.peg.2506 | Cytidylate kinase (EC 2.7.4.25)                                                                                                |  | -0.0383 | -0.058  | -0.624  | -0.643  | 0.835    | 0.851 | 0.000206 | 0.000243 |
| fig/6666666.474<br>865.peg.2440 | FIG01107869: hypothetical protein                                                                                              |  | -0.771  | -0.0593 | -1.23   | -0.515  | 0.000242 | 0.844 | 5.21E-07 | 0.0011   |
| fig/6666666.474<br>865.peg.2050 | Bifunctional autolysin Atl / N-acetylmuramoyl-L-alanine amidase (EC 3.5.1.28)/ endo-beta-N-acetylglucosaminidase (EC 3.2.1.96) |  | -0.0406 | -0.0606 | -1      | -1.02   | 0.933    | 0.943 | 0.00385  | 0.00359  |
| fig/6666666.474<br>865.peg.2042 | Naphthoate synthase (EC 4.1.3.36)                                                                                              |  | 0.139   | -0.0614 | -0.128  | -0.329  | 0.288    | 0.799 | 0.227    | 0.0057   |
| fig/6666666.474<br>865.peg.2608 | Branched-chain alpha-keto acid dehydrogenase, E1 component, alpha subunit (EC 1.2.4.4)                                         |  | 0.133   | -0.0627 | 0.211   | 0.0156  | 0.482    | 0.861 | 0.153    | 0.92     |
| fig/6666666.474<br>865.peg.499  | Pyrimidine-nucleoside phosphorylase (EC 2.4.2.2)                                                                               |  | -0.351  | -0.0632 | -0.439  | -0.152  | 0.0393   | 0.838 | 0.00374  | 0.252    |
| fig/6666666.474<br>865.peg.2713 | tRNA-specific 2-thiouridylase MnmA                                                                                             |  | -0.22   | -0.0635 | -0.0886 | 0.0683  | 0.591    | 0.943 | 0.809    | 0.847    |
| fig/6666666.474<br>865.peg.2088 | Protein of unknown function DUF1447                                                                                            |  | 0.0435  | -0.064  | -0.174  | -0.282  | 0.897    | 0.914 | 0.45     | 0.207    |
| fig/6666666.474<br>865.peg.1902 | FIG01108089: hypothetical protein                                                                                              |  | -0.445  | -0.0641 | -2.29   | -1.91   | 0.661    | 0.972 | 0.0053   | 0.0158   |
| fig/6666666.474<br>865.peg.273  | Aldehyde dehydrogenase (EC 1.2.1.3)                                                                                            |  | -0.147  | -0.0649 | 0.701   | 0.783   | 0.691    | 0.937 | 0.0157   | 0.0092   |
| fig/6666666.474<br>865.peg.1911 | Enoyl-[acyl-carrier-protein] reductase [FMN] (EC 1.3.1.9)                                                                      |  | 0.0717  | -0.0652 | 0.17    | 0.0334  | 0.897    | 0.947 | 0.677    | 0.929    |
| fig/6666666.474<br>865.peg.2141 | Thioredoxin                                                                                                                    |  | 0.0507  | -0.0657 | -0.238  | -0.355  | 0.792    | 0.842 | 0.0917   | 0.0177   |
| fig/6666666.474<br>865.peg.2456 | Dihydrofolate reductase (EC 1.5.1.3)                                                                                           |  | 0.164   | -0.0657 | -0.0439 | -0.273  | 0.527    | 0.903 | 0.853    | 0.167    |

|                                 |                                                                                                                         |      |         |         |          |         |        |       |         |          |
|---------------------------------|-------------------------------------------------------------------------------------------------------------------------|------|---------|---------|----------|---------|--------|-------|---------|----------|
| fig/6666666.474<br>865.peg.483  | LSU ribosomal protein L31p @ LSU ribosomal protein L31p, zinc-independent                                               |      | 0.00584 | -0.0669 | -0.457   | -0.53   | 0.975  | 0.846 | 0.00554 | 0.00234  |
| fig/6666666.474<br>865.peg.1552 | S1 RNA binding domain protein                                                                                           |      | 0.418   | -0.0673 | -0.603   | -1.09   | 0.173  | 0.925 | 0.021   | 0.000621 |
| fig/6666666.474<br>865.peg.991  | Clumping factor ClfB, fibrinogen binding protein                                                                        | clfB | -1.52   | -0.0677 | -0.471   | 0.981   | 0.288  | 0.985 | 0.727   | 0.406    |
| fig/6666666.474<br>865.peg.2226 | Malonyl CoA-acyl carrier protein transacylase (EC 2.3.1.39)                                                             |      | -0.032  | -0.068  | -0.187   | -0.223  | 0.855  | 0.806 | 0.122   | 0.0687   |
| fig/6666666.474<br>865.peg.2648 | DEAD-box ATP-dependent RNA helicase CshB (EC 3.6.4.13)                                                                  |      | 0.583   | -0.0682 | 0.529    | -0.122  | 0.0193 | 0.891 | 0.00975 | 0.534    |
| fig/6666666.474<br>865.peg.1447 | Alkyl hydroperoxide reductase protein F (EC 1.6.4.-)                                                                    |      | -0.0429 | -0.0688 | -0.366   | -0.392  | 0.824  | 0.824 | 0.012   | 0.00864  |
| fig/6666666.474<br>865.peg.251  | Aspartyl-tRNA(Asn) amidotransferase subunit A (EC 6.3.5.6) @ Glutamyl-tRNA(Gln) amidotransferase subunit A (EC 6.3.5.7) |      | 0.0758  | -0.0694 | 0.358    | 0.213   | 0.576  | 0.749 | 0.00246 | 0.0422   |
| fig/6666666.474<br>865.peg.2286 | 2-oxoglutarate oxidoreductase, beta subunit (EC 1.2.7.3)                                                                |      | 0.0568  | -0.0696 | -0.107   | -0.233  | 0.873  | 0.915 | 0.707   | 0.352    |
| fig/6666666.474<br>865.peg.1540 | Bona fide RidA/YjgF/TdcF/RutC subgroup                                                                                  |      | -0.465  | -0.0699 | -0.418   | -0.0226 | 0.0472 | 0.882 | 0.0293  | 0.913    |
| fig/6666666.474<br>865.peg.185  | ABC transporter, ATP-binding protein EcsA                                                                               |      | -0.475  | -0.0703 | 0.656    | 1.06    | 0.437  | 0.956 | 0.168   | 0.0327   |
| fig/6666666.474<br>865.peg.2206 | DNA-directed RNA polymerase omega subunit (EC 2.7.7.6)                                                                  |      | 0.21    | -0.0714 | -1.96    | -2.25   | 0.763  | 0.956 | 0.00119 | 0.000557 |
| fig/6666666.474<br>865.peg.965  | Malate:quinone oxidoreductase (EC 1.1.5.4)                                                                              |      | -0.279  | -0.0718 | -0.402   | -0.196  | 0.0244 | 0.708 | 0.00062 | 0.0459   |
| fig/6666666.474<br>865.peg.2208 | Helicase PriA essential for oriC/DnaA-independent DNA replication                                                       |      | -0.348  | -0.0719 | -1.23    | -0.955  | 0.723  | 0.969 | 0.0904  | 0.183    |
| fig/6666666.474<br>865.peg.602  | LSU ribosomal protein L16p (L10e)                                                                                       |      | 0.344   | -0.0727 | 0.000925 | -0.416  | 0.15   | 0.882 | 0.996   | 0.0374   |
| fig/6666666.474<br>865.peg.1401 | 3-ketoacyl-CoA thiolase (EC 2.3.1.16) @ Acetyl-CoA acetyltransferase (EC 2.3.1.9)                                       |      | -0.11   | -0.0729 | 0.629    | 0.666   | 0.704  | 0.903 | 0.00748 | 0.0057   |
| fig/6666666.474<br>865.peg.2275 | FIG009210: peptidase, M16 family                                                                                        |      | 0.566   | -0.0747 | 0.328    | -0.313  | 0.0258 | 0.882 | 0.0962  | 0.113    |
| fig/6666666.474<br>865.peg.1792 | FIG01108426: hypothetical protein                                                                                       | saeQ | -1.08   | -0.0763 | 1.92     | 2.92    | 0.146  | 0.96  | 0.00434 | 0.000262 |
| fig/6666666.474<br>865.peg.83   | Glutamyl aminopeptidase (EC 3.4.11.7); Deblocking aminopeptidase                                                        |      | -0.122  | -0.0769 | 0.121    | 0.166   | 0.63   | 0.861 | 0.533   | 0.373    |
| fig/6666666.474<br>865.peg.454  | Hydroxymethylpyrimidine phosphate kinase ThiD (EC 2.7.4.7)                                                              |      | -0.322  | -0.078  | 0.375    | 0.619   | 0.431  | 0.934 | 0.235   | 0.0536   |
| fig/6666666.474<br>865.peg.604  | LSU ribosomal protein L22p (L17e)                                                                                       |      | 0.175   | -0.0783 | -0.12    | -0.373  | 0.395  | 0.832 | 0.477   | 0.0286   |
| fig/6666666.474<br>865.peg.1853 | ATP-dependent Clp protease proteolytic subunit (EC 3.4.21.92)                                                           |      | -0.165  | -0.0793 | 0.505    | 0.59    | 0.431  | 0.831 | 0.00516 | 0.00212  |
| fig/6666666.474<br>865.peg.1300 | CDP-ribitol:poly(ribitol phosphate) ribitol phosphotransferase                                                          |      | 0.442   | -0.0796 | 0.673    | 0.151   | 0.161  | 0.906 | 0.0143  | 0.571    |
| fig/6666666.474<br>865.peg.2729 | Preprotein translocase subunit YajC (TC 3.A.5.1.1)                                                                      |      | 1.86    | -0.0797 | 1.56     | -0.377  | 0.211  | 0.982 | 0.198   | 0.776    |

|                                 |                                                                                                                        |  |         |         |        |         |          |       |          |          |
|---------------------------------|------------------------------------------------------------------------------------------------------------------------|--|---------|---------|--------|---------|----------|-------|----------|----------|
| fig/6666666.474<br>865.peg.1904 | Iron-sulfur cluster assembly ATPase protein SufC                                                                       |  | -0.0418 | -0.0809 | 0.257  | 0.218   | 0.823    | 0.774 | 0.0531   | 0.0974   |
| fig/6666666.474<br>865.peg.1440 | FIG01108790: hypothetical protein                                                                                      |  | -0.51   | -0.081  | -1.3   | -0.869  | 0.288    | 0.943 | 0.0035   | 0.0329   |
| fig/6666666.474<br>865.peg.2452 | PTS system, glucose-specific IIA component (EC 2.7.1.69)                                                               |  | 0.906   | -0.0824 | 2.15   | 1.16    | 1.60E-05 | 0.704 | 1.29E-10 | 2.50E-07 |
| fig/6666666.474<br>865.peg.651  | Urease accessory protein UreG                                                                                          |  | -0.451  | -0.083  | 0.579  | 0.946   | 0.15     | 0.904 | 0.0285   | 0.00193  |
| fig/6666666.474<br>865.peg.1654 | Vitamin B12 ABC transporter, B12-binding component BtuF                                                                |  | 0.243   | -0.0835 | -0.867 | -1.19   | 0.492    | 0.908 | 0.00477  | 0.000621 |
| fig/6666666.474<br>865.peg.2075 | Duplicated ATPase component YkoD of energizing module of thiamin-regulated ECF transporter for HydroxyMethylPyrimidine |  | -0.318  | -0.0853 | -0.433 | -0.201  | 0.13     | 0.826 | 0.0158   | 0.233    |
| fig/6666666.474<br>865.peg.1866 | 3'-to-5' exoribonuclease RNase R                                                                                       |  | 0.413   | -0.0858 | 0.605  | 0.106   | 0.258    | 0.914 | 0.0472   | 0.745    |
| fig/6666666.474<br>865.peg.1906 | Cysteine desulfurase (EC 2.8.1.7), SufS subfamily                                                                      |  | -0.189  | -0.0868 | 0.664  | 0.766   | 0.351    | 0.818 | 0.000766 | 0.000335 |
| fig/6666666.474<br>865.peg.607  | LSU ribosomal protein L23p (L23Ae)                                                                                     |  | 0.969   | -0.0878 | 0.0185 | -1.04   | 0.0116   | 0.906 | 0.957    | 0.00199  |
| fig/6666666.474<br>865.peg.1787 | Magnesium and cobalt efflux protein CorC                                                                               |  | -0.186  | -0.0882 | -0.196 | -0.0988 | 0.732    | 0.943 | 0.667    | 0.833    |
| fig/6666666.474<br>865.peg.2194 | Uracil phosphoribosyltransferase (EC 2.4.2.9) / Pyrimidine operon regulatory protein PyrR                              |  | -0.264  | -0.0894 | -0.554 | -0.379  | 0.223    | 0.824 | 0.00486  | 0.0379   |
| fig/6666666.474<br>865.peg.1838 | Protein export cytoplasm protein SecA ATPase RNA helicase (TC 3.A.5.1.1)                                               |  | 0.143   | -0.091  | 0.539  | 0.305   | 0.241    | 0.637 | 7.82E-05 | 0.00596  |
| fig/6666666.474<br>865.peg.1574 | Cysteinyl-tRNA synthetase (EC 6.1.1.16)                                                                                |  | -0.0493 | -0.0921 | 0.225  | 0.182   | 0.826    | 0.796 | 0.154    | 0.244    |
| fig/6666666.474<br>865.peg.48   | Acetate kinase (EC 2.7.2.1)                                                                                            |  | -0.231  | -0.0925 | -0.821 | -0.683  | 0.109    | 0.699 | 7.09E-06 | 5.83E-05 |
| fig/6666666.474<br>865.peg.1368 | FIG01108623: hypothetical protein                                                                                      |  | -0.239  | -0.0927 | -0.11  | 0.0363  | 0.408    | 0.862 | 0.661    | 0.885    |
| fig/6666666.474<br>865.peg.663  | Salicylate hydroxylase (EC 1.14.13.1)                                                                                  |  | -0.301  | -0.0953 | -0.438 | -0.232  | 0.27     | 0.859 | 0.0528   | 0.301    |
| fig/6666666.474<br>865.peg.1932 | Cytosol aminopeptidase PepA (EC 3.4.11.1)                                                                              |  | -0.458  | -0.096  | 0.129  | 0.491   | 0.0834   | 0.846 | 0.577    | 0.0271   |
| fig/6666666.474<br>865.peg.455  | Thiaminase II (EC 3.5.99.2)                                                                                            |  | -0.256  | -0.0981 | 1.1    | 1.26    | 0.329    | 0.842 | 9.66E-05 | 5.25E-05 |
| fig/6666666.474<br>865.peg.2714 | Cysteine desulfurase (EC 2.8.1.7)                                                                                      |  | -0.396  | -0.0994 | 0.0811 | 0.378   | 0.313    | 0.906 | 0.831    | 0.227    |
| fig/6666666.474<br>865.peg.488  | Fructose-bisphosphate aldolase class II (EC 4.1.2.13)                                                                  |  | -0.0749 | -0.0999 | -0.151 | -0.176  | 0.681    | 0.708 | 0.257    | 0.183    |
| fig/6666666.474<br>865.peg.35   | Pyruvate kinase (EC 2.7.1.40)                                                                                          |  | -0.228  | -0.1    | -0.266 | -0.139  | 0.0668   | 0.588 | 0.0123   | 0.162    |
| fig/6666666.474<br>865.peg.2507 | L-asparaginase (EC 3.5.1.1)                                                                                            |  | -0.16   | -0.101  | -0.12  | -0.0607 | 0.78     | 0.934 | 0.809    | 0.891    |
| fig/6666666.474<br>865.peg.1862 | Enolase (EC 4.2.1.11)                                                                                                  |  | 0.00838 | -0.102  | 0.0413 | -0.0694 | 0.963    | 0.595 | 0.73     | 0.513    |

|                                 |                                                                                                                             |           |         |        |         |         |         |       |          |          |
|---------------------------------|-----------------------------------------------------------------------------------------------------------------------------|-----------|---------|--------|---------|---------|---------|-------|----------|----------|
| fig/6666666.474<br>865.peg.405  | Redox-sensitive transcriptional regulator (AT-rich DNA-binding protein)                                                     |           | -0.0274 | -0.102 | 0.934   | 0.859   | 0.924   | 0.806 | 0.000113 | 0.000336 |
| fig/6666666.474<br>865.peg.763  | Respiratory nitrate reductase beta chain (EC 1.7.99.4)                                                                      |           | -0.151  | -0.102 | -1.08   | -1.03   | 0.926   | 0.969 | 0.308    | 0.338    |
| fig/6666666.474<br>865.peg.124  | Transaldolase (EC 2.2.1.2)                                                                                                  |           | -0.378  | -0.104 | -0.323  | -0.0483 | 0.0323  | 0.708 | 0.0247   | 0.749    |
| fig/6666666.474<br>865.peg.1361 | N-acetylneuraminate lyase (EC 4.1.3.3)                                                                                      |           | 0.531   | -0.105 | 0.452   | -0.184  | 0.429   | 0.943 | 0.392    | 0.746    |
| fig/6666666.474<br>865.peg.484  | Transcription termination factor Rho                                                                                        |           | -0.124  | -0.107 | -0.387  | -0.37   | 0.466   | 0.695 | 0.00735  | 0.0101   |
| fig/6666666.474<br>865.peg.1268 | Pyruvate formate-lyase (EC 2.3.1.54)                                                                                        |           | -0.966  | -0.109 | -1.6    | -0.743  | 0.00161 | 0.818 | 2.92E-06 | 0.00212  |
| fig/6666666.474<br>865.peg.1074 | Chromosome (plasmid) partitioning protein ParB                                                                              |           | 0.0736  | -0.109 | 0.0758  | -0.107  | 0.907   | 0.925 | 0.876    | 0.82     |
| fig/6666666.474<br>865.peg.2731 | S-adenosylmethionine:tRNA ribosyltransferase-isomerase (EC 5.-.-.-)                                                         |           | 0.336   | -0.109 | -0.241  | -0.685  | 0.32    | 0.864 | 0.38     | 0.0174   |
| fig/6666666.474<br>865.peg.2216 | Serine/threonine protein kinase PrkC, regulator of stationary phase                                                         |           | 0.0494  | -0.11  | 0.0329  | -0.127  | 0.893   | 0.842 | 0.914    | 0.61     |
| fig/6666666.474<br>865.peg.2500 | 2-heptaprenyl-1,4-naphthoquinone methyltransferase (EC 2.1.1.163)                                                           |           | -0.205  | -0.11  | 0.229   | 0.324   | 0.351   | 0.774 | 0.194    | 0.0683   |
| fig/6666666.474<br>865.peg.644  | Butyryl-CoA dehydrogenase (EC 1.3.99.2)                                                                                     |           | -0.746  | -0.111 | -1.27   | -0.631  | 0.00568 | 0.802 | 1.50E-05 | 0.00414  |
| fig/6666666.474<br>865.peg.1598 | Branched-chain amino acid aminotransferase (EC 2.6.1.42)                                                                    |           | -0.101  | -0.114 | 0.204   | 0.191   | 0.519   | 0.621 | 0.0929   | 0.113    |
| fig/6666666.474<br>865.peg.1919 | Hypothetical NagD-like phosphatase                                                                                          |           | -0.0608 | -0.114 | -0.108  | -0.161  | 0.808   | 0.773 | 0.578    | 0.377    |
| fig/6666666.474<br>865.peg.957  | 3-methyl-2-oxobutanoate hydroxymethyltransferase (EC 2.1.2.11)                                                              |           | -0.282  | -0.115 | 0.151   | 0.318   | 0.118   | 0.699 | 0.299    | 0.0351   |
| fig/6666666.474<br>865.peg.1541 | Protein of unknown function identified by role in sporulation (SpoVG)                                                       | spoV<br>G | -0.381  | -0.116 | -1.08   | -0.811  | 0.0451  | 0.703 | 6.42E-06 | 0.000108 |
| fig/6666666.474<br>865.peg.130  | S-adenosylmethionine synthetase (EC 2.5.1.6)                                                                                |           | 0.535   | -0.118 | 0.451   | -0.202  | 0.0244  | 0.771 | 0.0188   | 0.269    |
| fig/6666666.474<br>865.peg.2586 | Ferric uptake regulation protein FUR                                                                                        |           | 0.0132  | -0.119 | -0.244  | -0.377  | 0.974   | 0.881 | 0.448    | 0.225    |
| fig/6666666.474<br>865.peg.542  | Uncharacterized siderophore biosynthesis protein near heme transporter HtsABC @ Siderophore synthetase superfamily, group B |           | -0.355  | -0.119 | -0.0364 | 0.2     | 0.475   | 0.906 | 0.94     | 0.621    |
| fig/6666666.474<br>865.peg.231  | FIG133424: Low molecular weight protein tyrosine phosphatase (EC 3.1.3.48)                                                  |           | 1.41    | -0.12  | -0.605  | -2.13   | 0.0535  | 0.943 | 0.296    | 0.00193  |
| fig/6666666.474<br>865.peg.1219 | Aldehyde dehydrogenase B (EC 1.2.1.22)                                                                                      |           | -0.361  | -0.12  | 0.0527  | 0.294   | 0.263   | 0.845 | 0.867    | 0.265    |
| fig/6666666.474<br>865.peg.1790 | Sensor histidine protein kinase SaeS (EC 2.7.13.3) (exoprotein expression protein S)                                        | saeS      | -0.486  | -0.122 | 0.365   | 0.73    | 0.0259  | 0.727 | 0.0361   | 0.000696 |
| fig/6666666.474<br>865.peg.2094 | Dihydropyridine dehydrogenase of pyruvate dehydrogenase complex (EC 1.8.1.4)                                                |           | -0.16   | -0.122 | -0.121  | -0.0828 | 0.259   | 0.57  | 0.299    | 0.487    |
| fig/6666666.474<br>865.peg.2730 | tRNA-guanine transglycosylase (EC 2.4.2.29)                                                                                 |           | -0.288  | -0.122 | -0.143  | 0.0221  | 0.331   | 0.82  | 0.578    | 0.929    |

|                                 |                                                                                                                    |      |         |        |         |         |          |       |          |          |
|---------------------------------|--------------------------------------------------------------------------------------------------------------------|------|---------|--------|---------|---------|----------|-------|----------|----------|
| fig/6666666.474<br>865.peg.1710 | Probable low-affinity inorganic phosphate transporter                                                              |      | -0.724  | -0.123 | 0.513   | 1.11    | 0.502    | 0.956 | 0.572    | 0.179    |
| fig/6666666.474<br>865.peg.263  | FIG01225759: possible membrane protein                                                                             |      | 0.89    | -0.123 | -0.206  | -1.22   | 0.489    | 0.962 | 0.865    | 0.221    |
| fig/6666666.474<br>865.peg.271  | Manganese-dependent inorganic pyrophosphatase (EC 3.6.1.1)                                                         |      | 0.0705  | -0.124 | 0.414   | 0.22    | 0.691    | 0.613 | 0.00435  | 0.0899   |
| fig/6666666.474<br>865.peg.2481 | Multimodular transpeptidase-transglycosylase (EC 2.4.1.129) (EC 3.4.-.-) / Penicillin-binding protein 1A/1B (PBP1) | pbp2 | 0.808   | -0.125 | 1.26    | 0.322   | 0.000725 | 0.693 | 1.88E-06 | 0.0398   |
| fig/6666666.474<br>865.peg.1652 | Arginyl-tRNA synthetase (EC 6.1.1.19)                                                                              |      | -0.208  | -0.126 | -0.159  | -0.0768 | 0.189    | 0.601 | 0.22     | 0.568    |
| fig/6666666.474<br>865.peg.56   | SSU ribosomal protein S4p (S9e)                                                                                    |      | 0.395   | -0.126 | 0.228   | -0.293  | 0.0503   | 0.7   | 0.155    | 0.0695   |
| fig/6666666.474<br>865.peg.1858 | NAD-dependent glyceraldehyde-3-phosphate dehydrogenase (EC 1.2.1.12)                                               |      | -0.0682 | -0.127 | -0.0516 | -0.11   | 0.684    | 0.573 | 0.714    | 0.375    |
| fig/6666666.474<br>865.peg.65   | Tyrosyl-tRNA synthetase (EC 6.1.1.1)                                                                               |      | -0.0589 | -0.128 | -0.505  | -0.574  | 0.729    | 0.59  | 0.00101  | 0.000491 |
| fig/6666666.474<br>865.peg.214  | Glutamate-1-semialdehyde aminotransferase (EC 5.4.3.8)                                                             |      | -0.0996 | -0.129 | 0.451   | 0.421   | 0.663    | 0.703 | 0.0117   | 0.0174   |
| fig/6666666.474<br>865.peg.1451 | FIG01108085: hypothetical protein                                                                                  |      | 0.0209  | -0.131 | -0.144  | -0.296  | 0.962    | 0.816 | 0.586    | 0.221    |
| fig/6666666.474<br>865.peg.1952 | Glucose-6-phosphate isomerase (EC 5.3.1.9)                                                                         |      | -0.127  | -0.131 | 0.568   | 0.563   | 0.389    | 0.537 | 0.000165 | 0.000262 |
| fig/6666666.474<br>865.peg.269  | cell wall surface anchor family protein                                                                            |      | -0.195  | -0.131 | 0.576   | 0.64    | 0.789    | 0.933 | 0.274    | 0.221    |
| fig/6666666.474<br>865.peg.1891 | Putative nitroreductase family protein SACOL0874                                                                   |      | 0.466   | -0.132 | 1.17    | 0.57    | 0.626    | 0.946 | 0.093    | 0.419    |
| fig/6666666.474<br>865.peg.2066 | Phosphoribosylformylglycinamide synthase, PurS subunit (EC 6.3.5.3)                                                |      | -0.299  | -0.133 | -0.581  | -0.414  | 0.216    | 0.752 | 0.00711  | 0.0406   |
| fig/6666666.474<br>865.peg.274  | 6-phosphogluconolactonase (EC 3.1.1.31)                                                                            |      | -0.237  | -0.137 | 0.281   | 0.381   | 0.291    | 0.708 | 0.122    | 0.042    |
| fig/6666666.474<br>865.peg.585  | SSU ribosomal protein S13p (S18e)                                                                                  |      | 0.249   | -0.137 | -0.321  | -0.708  | 0.166    | 0.626 | 0.0331   | 0.000288 |
| fig/6666666.474<br>865.peg.1563 | Pyridoxine biosynthesis glutamine amidotransferase, synthase subunit (EC 2.4.2.-)                                  |      | -0.103  | -0.138 | -0.213  | -0.248  | 0.478    | 0.508 | 0.0615   | 0.0342   |
| fig/6666666.474<br>865.peg.1974 | 3-oxoacyl-[acyl-carrier-protein] synthase, KASII (EC 2.3.1.179)                                                    |      | -0.165  | -0.138 | -0.129  | -0.103  | 0.35     | 0.596 | 0.364    | 0.473    |
| fig/6666666.474<br>865.peg.95   | D-alanine aminotransferase (EC 2.6.1.21)                                                                           |      | -0.107  | -0.138 | 0.566   | 0.536   | 0.639    | 0.681 | 0.00276  | 0.00414  |
| fig/6666666.474<br>865.peg.2623 | Lipoate-protein ligase A                                                                                           |      | -0.185  | -0.139 | 0.181   | 0.226   | 0.437    | 0.708 | 0.33     | 0.218    |
| fig/6666666.474<br>865.peg.481  | Thymidine kinase (EC 2.7.1.21)                                                                                     |      | -0.155  | -0.139 | -0.0525 | -0.0358 | 0.453    | 0.664 | 0.782    | 0.847    |
| fig/6666666.474<br>865.peg.588  | Adenylate kinase (EC 2.7.4.3)                                                                                      |      | 0.224   | -0.139 | -0.377  | -0.74   | 0.15     | 0.542 | 0.00697  | 6.13E-05 |
| fig/6666666.474<br>865.peg.2449 | Carboxyl-terminal protease (EC 3.4.21.102)                                                                         |      | 0.198   | -0.14  | 1.2     | 0.863   | 0.615    | 0.831 | 0.000668 | 0.00701  |

|                                 |                                                                                                           |  |         |        |        |         |          |       |          |          |
|---------------------------------|-----------------------------------------------------------------------------------------------------------|--|---------|--------|--------|---------|----------|-------|----------|----------|
| fig/6666666.474<br>865.peg.2502 | DNA-binding protein HBSu                                                                                  |  | -0.058  | -0.14  | -0.778 | -0.86   | 0.826    | 0.708 | 0.000635 | 0.000383 |
| fig/6666666.474<br>865.peg.1957 | ATP-dependent nuclease, subunit A                                                                         |  | -1.14   | -0.143 | -0.365 | 0.629   | 0.0456   | 0.906 | 0.429    | 0.162    |
| fig/6666666.474<br>865.peg.784  | Phosphoglycerate mutase (EC 5.4.2.1)                                                                      |  | -1.36   | -0.144 | -1.48  | -0.257  | 3.41E-05 | 0.699 | 1.90E-06 | 0.154    |
| fig/6666666.474<br>865.peg.1525 | Thymidylate kinase (EC 2.7.4.9)                                                                           |  | 0.206   | -0.144 | 0.117  | -0.233  | 0.543    | 0.806 | 0.689    | 0.375    |
| fig/6666666.474<br>865.peg.2718 | Iron-sulfur cluster regulator IscR                                                                        |  | 0.206   | -0.144 | 0.204  | -0.146  | 0.363    | 0.699 | 0.259    | 0.425    |
| fig/6666666.474<br>865.peg.1572 | Glutamyl-tRNA synthetase (EC 6.1.1.17) @ Glutamyl-tRNA(Gln) synthetase (EC 6.1.1.24)                      |  | -0.221  | -0.145 | -0.313 | -0.237  | 0.102    | 0.458 | 0.00774  | 0.034    |
| fig/6666666.474<br>865.peg.584  | SSU ribosomal protein S11p (S14e)                                                                         |  | 0.311   | -0.148 | -0.339 | -0.798  | 0.461    | 0.846 | 0.301    | 0.021    |
| fig/6666666.474<br>865.peg.388  | Heat shock protein 60 family chaperone GroEL                                                              |  | -0.0317 | -0.149 | 0.354  | 0.237   | 0.832    | 0.432 | 0.00316  | 0.0308   |
| fig/6666666.474<br>865.peg.1650 | Alcohol dehydrogenase (EC 1.1.1.1)                                                                        |  | -1.17   | -0.15  | -2.37  | -1.35   | 0.00223  | 0.803 | 8.70E-07 | 0.000182 |
| fig/6666666.474<br>865.peg.1961 | CoA-disulfide reductase (EC 1.8.1.14)                                                                     |  | -0.0261 | -0.151 | 0.421  | 0.297   | 0.897    | 0.536 | 0.00425  | 0.0307   |
| fig/6666666.474<br>865.peg.1965 | ClpB protein                                                                                              |  | -0.0292 | -0.151 | 0.257  | 0.136   | 0.897    | 0.588 | 0.0861   | 0.372    |
| fig/6666666.474<br>865.peg.6    | Glutamate-1-semialdehyde aminotransferase (EC 5.4.3.8)                                                    |  | -0.315  | -0.154 | -0.399 | -0.238  | 0.0665   | 0.537 | 0.00752  | 0.0818   |
| fig/6666666.474<br>865.peg.2057 | quinol oxidase polypeptide I QoxB (EC:1.9.3.-)                                                            |  | -0.317  | -0.155 | -0.34  | -0.178  | 0.211    | 0.708 | 0.0997   | 0.395    |
| fig/6666666.474<br>865.peg.2372 | FIG01108406: hypothetical protein                                                                         |  | 0.00139 | -0.156 | -2.91  | -3.07   | 0.998    | 0.904 | 2.84E-05 | 3.41E-05 |
| fig/6666666.474<br>865.peg.14   | Cell division trigger factor (EC 5.2.1.8)                                                                 |  | 0.131   | -0.157 | 0.0544 | -0.234  | 0.504    | 0.578 | 0.764    | 0.125    |
| fig/6666666.474<br>865.peg.1410 | GTP-binding and nucleic acid-binding protein YchF                                                         |  | 0.505   | -0.157 | 0.566  | -0.0953 | 0.00499  | 0.508 | 0.000393 | 0.465    |
| fig/6666666.474<br>865.peg.1681 | Mn-dependent transcriptional regulator MntR                                                               |  | -0.171  | -0.158 | -0.628 | -0.615  | 0.691    | 0.826 | 0.0509   | 0.0555   |
| fig/6666666.474<br>865.peg.1764 | Lysine decarboxylase family                                                                               |  | 0.432   | -0.158 | 0.573  | -0.0165 | 0.109    | 0.713 | 0.013    | 0.941    |
| fig/6666666.474<br>865.peg.1569 | ATP-dependent Clp protease, ATP-binding subunit ClpC / Negative regulator of genetic competence clcC/mecB |  | -0.0294 | -0.159 | 0.192  | 0.0626  | 0.842    | 0.419 | 0.0652   | 0.562    |
| fig/6666666.474<br>865.peg.276  | FIG01108203: hypothetical protein                                                                         |  | -0.324  | -0.159 | -0.97  | -0.805  | 0.22     | 0.708 | 0.000325 | 0.00172  |
| fig/6666666.474<br>865.peg.895  | Esterase/lipase (EC 3.1.1.-)                                                                              |  | 0.0941  | -0.159 | 0.201  | -0.0514 | 0.723    | 0.695 | 0.304    | 0.819    |
| fig/6666666.474<br>865.peg.1239 | Pyruvate decarboxylase (EC 4.1.1.1); Alpha-keto-acid decarboxylase (EC 4.1.1.-)                           |  | -0.311  | -0.162 | -0.165 | -0.016  | 0.15     | 0.638 | 0.356    | 0.929    |
| fig/6666666.474<br>865.peg.1709 | FIG01107977: hypothetical protein                                                                         |  | 0.202   | -0.163 | 0.302  | -0.062  | 0.33     | 0.598 | 0.0708   | 0.729    |



|                                 |                                                                          |      |         |        |         |         |        |       |          |          |
|---------------------------------|--------------------------------------------------------------------------|------|---------|--------|---------|---------|--------|-------|----------|----------|
| fig/6666666.474<br>865.peg.2271 | Ribonuclease J2 (endoribonuclease in RNA processing)                     |      | -0.178  | -0.163 | 0.164   | 0.179   | 0.324  | 0.537 | 0.259    | 0.215    |
| fig/6666666.474<br>865.peg.494  | Hypothetical protein SAV2131                                             |      | 0.929   | -0.164 | -0.473  | -1.56   | 0.0244 | 0.82  | 0.137    | 0.000247 |
| fig/6666666.474<br>865.peg.601  | LSU ribosomal protein L29p (L35e)                                        |      | -0.467  | -0.164 | -1.25   | -0.949  | 0.0535 | 0.673 | 1.52E-05 | 0.000237 |
| fig/6666666.474<br>865.peg.2672 | Heat shock protein GrpE                                                  |      | 0.0143  | -0.165 | 0.285   | 0.105   | 0.966  | 0.699 | 0.171    | 0.629    |
| fig/6666666.474<br>865.peg.1865 | Carboxylesterase (EC 3.1.1.1)                                            |      | 0.182   | -0.166 | 0.0505  | -0.297  | 0.749  | 0.87  | 0.923    | 0.493    |
| fig/6666666.474<br>865.peg.2505 | SSU ribosomal protein S1p                                                |      | -0.132  | -0.166 | 0.478   | 0.444   | 0.461  | 0.519 | 0.0028   | 0.00479  |
| fig/6666666.474<br>865.peg.1456 | Inosine-5'-monophosphate dehydrogenase (EC 1.1.1.205)                    |      | 0.0858  | -0.167 | -0.105  | -0.358  | 0.507  | 0.389 | 0.294    | 0.00232  |
| fig/6666666.474<br>865.peg.1791 | Response regulator SaeR (Staphylococcus exoprotein expression protein R) | saeR | -0.881  | -0.167 | -0.0133 | 0.701   | 0.0137 | 0.774 | 0.964    | 0.0142   |
| fig/6666666.474<br>865.peg.748  | FIG01108504: hypothetical protein                                        |      | -0.0662 | -0.167 | -1.26   | -1.36   | 0.897  | 0.829 | 0.00156  | 0.00106  |
| fig/6666666.474<br>865.peg.1860 | Triosephosphate isomerase (EC 5.3.1.1)                                   |      | 0.138   | -0.169 | -0.144  | -0.451  | 0.449  | 0.519 | 0.307    | 0.00484  |
| fig/6666666.474<br>865.peg.2501 | Heptaprenyl diphosphate synthase component I (EC 2.5.1.30)               |      | -0.182  | -0.169 | -0.116  | -0.103  | 0.576  | 0.742 | 0.674    | 0.699    |
| fig/6666666.474<br>865.peg.2250 | ATP-dependent hsl protease ATP-binding subunit HslU                      |      | 0.0834  | -0.172 | -0.141  | -0.396  | 0.716  | 0.581 | 0.408    | 0.0246   |
| fig/6666666.474<br>865.peg.2384 | Topoisomerase IV subunit B (EC 5.99.1.-)                                 |      | -0.0953 | -0.172 | -0.314  | -0.391  | 0.68   | 0.581 | 0.0634   | 0.0266   |
| fig/6666666.474<br>865.peg.2509 | Elastin binding protein EbpS                                             |      | -0.197  | -0.173 | -0.0924 | -0.0685 | 0.614  | 0.779 | 0.785    | 0.834    |
| fig/6666666.474<br>865.peg.2593 | Glucose-6-phosphate 1-dehydrogenase (EC 1.1.1.49)                        |      | -0.101  | -0.173 | 0.823   | 0.751   | 0.615  | 0.525 | 5.91E-05 | 0.000193 |
| fig/6666666.474<br>865.peg.265  | Nicotinate phosphoribosyltransferase (EC 2.4.2.11)                       |      | -0.248  | -0.173 | -0.132  | -0.0572 | 0.146  | 0.497 | 0.338    | 0.699    |
| fig/6666666.474<br>865.peg.1991 | Tryptophanyl-tRNA synthetase (EC 6.1.1.2)                                |      | 0.345   | -0.174 | -0.11   | -0.628  | 0.13   | 0.621 | 0.582    | 0.00318  |
| fig/6666666.474<br>865.peg.45   | Proline dipeptidase (EC 3.4.13.9)                                        |      | -0.226  | -0.176 | 0.395   | 0.445   | 0.22   | 0.525 | 0.0136   | 0.0074   |
| fig/6666666.474<br>865.peg.880  | acetyltransferase (GNAT) family protein                                  |      | -1.61   | -0.177 | -2.84   | -1.4    | 0.116  | 0.943 | 0.00285  | 0.0908   |
| fig/6666666.474<br>865.peg.2504 | GTP-binding protein EngA                                                 |      | 0.12    | -0.178 | 0.225   | -0.0736 | 0.581  | 0.543 | 0.17     | 0.676    |
| fig/6666666.474<br>865.peg.779  | Molybdenum transport ATP-binding protein ModC (TC 3.A.1.8.1)             |      | -0.0804 | -0.178 | -0.174  | -0.272  | 0.64   | 0.432 | 0.158    | 0.034    |
| fig/6666666.474<br>865.peg.747  | General stress protein 26                                                |      | 0.415   | -0.179 | -2.03   | -2.63   | 0.732  | 0.943 | 0.0297   | 0.00875  |
| fig/6666666.474<br>865.peg.103  | Leucyl-tRNA synthetase (EC 6.1.1.4)                                      |      | -0.32   | -0.18  | -0.112  | 0.0278  | 0.0456 | 0.432 | 0.38     | 0.847    |

|                                 |                                                                                                                                |     |         |        |         |         |        |       |          |          |
|---------------------------------|--------------------------------------------------------------------------------------------------------------------------------|-----|---------|--------|---------|---------|--------|-------|----------|----------|
| fig 6666666.474<br>865.peg.107  | Repressor of toxins Rot                                                                                                        | rot | -0.193  | -0.181 | -0.753  | -0.741  | 0.5    | 0.694 | 0.00303  | 0.00359  |
| fig 6666666.474<br>865.peg.181  | Ferrochelatase, protoheme ferro-lyase (EC 4.99.1.1)                                                                            |     | -0.098  | -0.183 | 0.24    | 0.155   | 0.745  | 0.695 | 0.288    | 0.502    |
| fig 6666666.474<br>865.peg.2011 | 2H phosphoesterase superfamily protein Bsu1186 (yjcG)                                                                          |     | 0.119   | -0.183 | -0.722  | -1.02   | 0.64   | 0.59  | 0.000971 | 7.93E-05 |
| fig 6666666.474<br>865.peg.2363 | FIG01108419: hypothetical protein                                                                                              |     | -0.645  | -0.183 | -0.554  | -0.092  | 0.0173 | 0.653 | 0.0122   | 0.676    |
| fig 6666666.474<br>865.peg.501  | Purine nucleoside phosphorylase (EC 2.4.2.1)                                                                                   |     | 0.119   | -0.185 | 0.629   | 0.325   | 0.493  | 0.455 | 0.000269 | 0.0228   |
| fig 6666666.474<br>865.peg.1585 | Ribosomal RNA small subunit methyltransferase C (EC 2.1.1.52)                                                                  |     | -0.45   | -0.186 | -0.298  | -0.0341 | 0.109  | 0.691 | 0.186    | 0.89     |
| fig 6666666.474<br>865.peg.1958 | Fumarylacetoacetate hydrolase family protein                                                                                   |     | 0.0431  | -0.186 | 0.248   | 0.0186  | 0.8    | 0.419 | 0.0492   | 0.89     |
| fig 6666666.474<br>865.peg.2591 | Pyrroline-5-carboxylate reductase (EC 1.5.1.2)                                                                                 |     | -0.423  | -0.186 | 0.0364  | 0.274   | 0.239  | 0.773 | 0.921    | 0.357    |
| fig 6666666.474<br>865.peg.1556 | Chaperonin (heat shock protein 33)                                                                                             |     | 0.145   | -0.189 | -0.0714 | -0.405  | 0.539  | 0.57  | 0.732    | 0.0308   |
| fig 6666666.474<br>865.peg.2664 | DUF1432 domain-containing protein                                                                                              |     | -0.243  | -0.193 | 0.00179 | 0.0518  | 0.142  | 0.432 | 0.994    | 0.721    |
| fig 6666666.474<br>865.peg.1094 | LSU ribosomal protein L9p                                                                                                      |     | 0.425   | -0.194 | -0.914  | -1.53   | 0.304  | 0.798 | 0.0108   | 0.000403 |
| fig 6666666.474<br>865.peg.590  | LSU ribosomal protein L15p (L27Ae)                                                                                             |     | 0.394   | -0.194 | -0.476  | -1.06   | 0.131  | 0.636 | 0.0289   | 0.000215 |
| fig 6666666.474<br>865.peg.16   | FIG01108166: hypothetical protein                                                                                              |     | 0.46    | -0.196 | 0.323   | -0.333  | 0.0379 | 0.537 | 0.0645   | 0.0576   |
| fig 6666666.474<br>865.peg.75   | Chorismate mutase I (EC 5.4.99.5) / 2-keto-3-deoxy-D-arabino-heptulosonate-7-phosphate synthase I beta (EC 2.5.1.54)           |     | -0.247  | -0.196 | -0.296  | -0.245  | 0.122  | 0.419 | 0.0267   | 0.0601   |
| fig 6666666.474<br>865.peg.964  | Fructose-bisphosphate aldolase class I (EC 4.1.2.13)                                                                           |     | -0.267  | -0.196 | -1.02   | -0.95   | 0.108  | 0.422 | 3.49E-06 | 1.31E-05 |
| fig 6666666.474<br>865.peg.899  | Pyruvate oxidase [ubiquinone, cytochrome] (EC 1.2.2.2) @ Pyruvate oxidase, CidC                                                |     | -0.161  | -0.197 | 0.391   | 0.355   | 0.251  | 0.369 | 0.00299  | 0.00573  |
| fig 6666666.474<br>865.peg.2032 | Poly(glycerol-phosphate) alpha-glucosyltransferase (EC 2.4.1.52)                                                               |     | -0.56   | -0.198 | 0.0288  | 0.39    | 0.0912 | 0.708 | 0.928    | 0.14     |
| fig 6666666.474<br>865.peg.1559 | Dihydroneopterin aldolase (EC 4.1.2.25)                                                                                        |     | 0.197   | -0.204 | 0.46    | 0.0582  | 0.64   | 0.753 | 0.129    | 0.868    |
| fig 6666666.474<br>865.peg.2597 | Glyoxalase/bleomycin resistance protein/dioxygenase superfamily protein                                                        |     | 0.308   | -0.206 | 1.18    | 0.661   | 0.527  | 0.808 | 0.00478  | 0.0776   |
| fig 6666666.474<br>865.peg.1557 | Cysteine synthase (EC 2.5.1.47)                                                                                                |     | -0.187  | -0.207 | -0.129  | -0.149  | 0.22   | 0.389 | 0.299    | 0.225    |
| fig 6666666.474<br>865.peg.41   | FIG146085: 3'-to-5' oligoribonuclease A, Bacillus type                                                                         |     | -0.256  | -0.207 | 0.103   | 0.152   | 0.547  | 0.773 | 0.787    | 0.659    |
| fig 6666666.474<br>865.peg.1179 | 2,3-butanediol dehydrogenase, S-alcohol forming, (R)-acetoin-specific (EC 1.1.1.4) / Acetoin (diacetyl) reductase (EC 1.1.1.5) |     | -0.373  | -0.21  | -0.375  | -0.211  | 0.0588 | 0.458 | 0.0216   | 0.176    |
| fig 6666666.474<br>865.peg.2373 | Transketolase (EC 2.2.1.1)                                                                                                     |     | -0.0826 | -0.211 | 0.00275 | -0.126  | 0.481  | 0.223 | 0.98     | 0.167    |

|                                 |                                                                                                                                                                                |      |         |        |        |          |         |       |          |          |
|---------------------------------|--------------------------------------------------------------------------------------------------------------------------------------------------------------------------------|------|---------|--------|--------|----------|---------|-------|----------|----------|
| fig/6666666.474<br>865.peg.831  | Dipeptide-binding ABC transporter, periplasmic substrate-binding component (TC 3.A.1.5.2)                                                                                      |      | -1.33   | -0.214 | -2.58  | -1.46    | 0.108   | 0.904 | 0.00114  | 0.0342   |
| fig/6666666.474<br>865.peg.603  | SSU ribosomal protein S3p (S3e)                                                                                                                                                |      | 0.281   | -0.215 | 0.204  | -0.292   | 0.162   | 0.473 | 0.217    | 0.0775   |
| fig/6666666.474<br>865.peg.657  | Secretory antigen precursor SsaA                                                                                                                                               | ssaA | -0.766  | -0.215 | -0.721 | -0.17    | 0.0668  | 0.771 | 0.0341   | 0.625    |
| fig/6666666.474<br>865.peg.666  | Hypothetical protein YrhD                                                                                                                                                      |      | -1.41   | -0.217 | -2.53  | -1.33    | 0.00905 | 0.811 | 1.84E-05 | 0.00345  |
| fig/6666666.474<br>865.peg.43   | Universal stress protein family                                                                                                                                                |      | -0.167  | -0.217 | -0.963 | -1.01    | 0.229   | 0.323 | 1.41E-06 | 1.43E-06 |
| fig/6666666.474<br>865.peg.2184 | Hypothetical protein YggS, proline synthase co-transcribed bacterial homolog PROSC                                                                                             |      | -0.109  | -0.219 | -0.093 | -0.203   | 0.859   | 0.82  | 0.853    | 0.648    |
| fig/6666666.474<br>865.peg.956  | Pantoate--beta-alanine ligase (EC 6.3.2.1)                                                                                                                                     |      | -0.336  | -0.219 | 0.719  | 0.836    | 0.33    | 0.699 | 0.0146   | 0.0067   |
| fig/6666666.474<br>865.peg.780  | L-Cystine ABC transporter, permease protein TcyB                                                                                                                               |      | 0.38    | -0.22  | 2.58   | 1.98     | 0.764   | 0.937 | 0.00984  | 0.0385   |
| fig/6666666.474<br>865.peg.1580 | Transcription antitermination protein NusG                                                                                                                                     |      | 0.331   | -0.22  | 0.26   | -0.291   | 0.0788  | 0.43  | 0.0864   | 0.0572   |
| fig/6666666.474<br>865.peg.2292 | DNA mismatch repair protein MutL                                                                                                                                               |      | 0.769   | -0.22  | 0.749  | -0.24    | 0.109   | 0.803 | 0.0545   | 0.55     |
| fig/6666666.474<br>865.peg.1630 | Hemoprotein HemQ, essential component of heme biosynthetic pathway in Gram-positive bacteria                                                                                   |      | -0.166  | -0.223 | 0.39   | 0.332    | 0.394   | 0.43  | 0.0159   | 0.0359   |
| fig/6666666.474<br>865.peg.1288 | Inosine-uridine preferring nucleoside hydrolase (EC 3.2.2.1)                                                                                                                   |      | -0.293  | -0.225 | 0.216  | 0.284    | 0.384   | 0.681 | 0.428    | 0.286    |
| fig/6666666.474<br>865.peg.2620 | Aminopeptidase YpdF (MP-, MA-, MS-, AP-, NP- specific)                                                                                                                         |      | -0.5    | -0.226 | 0.033  | 0.307    | 0.00732 | 0.389 | 0.839    | 0.0301   |
| fig/6666666.474<br>865.peg.753  | Molecular chaperone, small heat shock protein                                                                                                                                  |      | 0.218   | -0.227 | 2.02   | 1.58     | 0.576   | 0.703 | 8.93E-06 | 0.000117 |
| fig/6666666.474<br>865.peg.1241 | PTS system, glucose-specific IIC component (EC 2.7.1.69) / PTS system, glucose-specific IIB component (EC 2.7.1.69) / PTS system, glucose-specific IIA component (EC 2.7.1.69) |      | -0.269  | -0.227 | -0.396 | -0.354   | 0.136   | 0.415 | 0.0116   | 0.0213   |
| fig/6666666.474<br>865.peg.1944 | Peptidyl-prolyl cis-trans isomerase (EC 5.2.1.8)                                                                                                                               |      | 0.552   | -0.228 | -0.069 | -0.849   | 0.00175 | 0.323 | 0.592    | 1.31E-05 |
| fig/6666666.474<br>865.peg.464  | ATP synthase epsilon chain (EC 3.6.3.14)                                                                                                                                       |      | -0.0733 | -0.229 | 1.71   | 1.56     | 0.962   | 0.926 | 0.0542   | 0.0777   |
| fig/6666666.474<br>865.peg.2001 | NAD kinase (EC 2.7.1.23)                                                                                                                                                       |      | 0.0202  | -0.23  | 0.439  | 0.189    | 0.961   | 0.542 | 0.0393   | 0.375    |
| fig/6666666.474<br>865.peg.2237 | LSU ribosomal protein L19p                                                                                                                                                     |      | -0.15   | -0.23  | 0.21   | 0.13     | 0.598   | 0.543 | 0.32     | 0.555    |
| fig/6666666.474<br>865.peg.250  | Aspartyl-tRNA(Asn) amidotransferase subunit B (EC 6.3.5.6) @ Glutamyl-tRNA(Gln) amidotransferase subunit B (EC 6.3.5.7)                                                        |      | 0.0446  | -0.231 | 0.273  | -0.00223 | 0.773   | 0.276 | 0.0199   | 0.987    |
| fig/6666666.474<br>865.peg.2671 | Chaperone protein DnaK                                                                                                                                                         |      | -0.151  | -0.232 | 0.261  | 0.18     | 0.238   | 0.225 | 0.0172   | 0.0838   |
| fig/6666666.474<br>865.peg.1697 | Phosphoenolpyruvate-dihydroxyacetone phosphotransferase (EC 2.7.1.121), ADP-binding subunit DhaL                                                                               |      | -0.266  | -0.237 | 1.65   | 1.68     | 0.777   | 0.898 | 0.0199   | 0.0192   |

|                                 |                                                                                                                   |  |         |        |          |         |          |       |          |          |
|---------------------------------|-------------------------------------------------------------------------------------------------------------------|--|---------|--------|----------|---------|----------|-------|----------|----------|
| fig 6666666.474<br>865.peg.1414 | SSU ribosomal protein S18p @ SSU ribosomal protein S18p, zinc-independent                                         |  | -0.272  | -0.237 | -0.481   | -0.446  | 0.298    | 0.537 | 0.0276   | 0.0405   |
| fig 6666666.474<br>865.peg.1570 | DNA repair protein RadA                                                                                           |  | 1.32    | -0.238 | 1.74     | 0.185   | 0.106    | 0.889 | 0.0124   | 0.798    |
| fig 6666666.474<br>865.peg.1807 | L-proline glycine betaine binding ABC transporter protein ProX (TC 3.A.1.12.1) / Osmotic adaptation               |  | -0.848  | -0.239 | 0.706    | 1.31    | 0.502    | 0.934 | 0.489    | 0.177    |
| fig 6666666.474<br>865.peg.2255 | Ribosome recycling factor                                                                                         |  | -0.0117 | -0.239 | -0.987   | -1.22   | 0.967    | 0.495 | 9.88E-05 | 3.41E-05 |
| fig 6666666.474<br>865.peg.2606 | Dihydrolipoamide acyltransferase component of branched-chain alpha-keto acid dehydrogenase complex (EC 2.3.1.168) |  | 0.48    | -0.242 | 0.487    | -0.235  | 0.0838   | 0.543 | 0.0323   | 0.293    |
| fig 6666666.474<br>865.peg.79   | Cell division protein FtsK                                                                                        |  | 0.243   | -0.243 | -0.0288  | -0.515  | 0.414    | 0.57  | 0.921    | 0.033    |
| fig 6666666.474<br>865.peg.1837 | Ribosomal subunit interface protein                                                                               |  | -0.176  | -0.245 | -0.00822 | -0.0778 | 0.341    | 0.389 | 0.962    | 0.615    |
| fig 6666666.474<br>865.peg.2486 | DinG family ATP-dependent helicase YoaA                                                                           |  | -0.213  | -0.246 | 0.908    | 0.875   | 0.554    | 0.652 | 0.00359  | 0.00484  |
| fig 6666666.474<br>865.peg.920  | D-specific D-2-hydroxyacid dehydrogenase ddh homolog (EC 1.1.1.28)                                                |  | -0.765  | -0.247 | -0.469   | 0.0492  | 0.0208   | 0.604 | 0.0671   | 0.868    |
| fig 6666666.474<br>865.peg.1084 | DNA gyrase subunit B (EC 5.99.1.3)                                                                                |  | 0.163   | -0.249 | 0.24     | -0.173  | 0.561    | 0.529 | 0.259    | 0.425    |
| fig 6666666.474<br>865.peg.199  | Similar to ribosomal large subunit pseudouridine synthase D, Bacillus subtilis YhcT type                          |  | 0.659   | -0.249 | 0.371    | -0.536  | 0.0409   | 0.596 | 0.141    | 0.0394   |
| fig 6666666.474<br>865.peg.497  | S-ribosylhomocysteine lyase (EC 4.4.1.21) / Autoinducer-2 production protein LuxS                                 |  | 0.15    | -0.25  | 0.0669   | -0.333  | 0.667    | 0.597 | 0.827    | 0.187    |
| fig 6666666.474<br>865.peg.873  | ABC transporter ATP-binding protein                                                                               |  | -1.38   | -0.251 | -3.38    | -2.25   | 0.149    | 0.904 | 0.00044  | 0.00837  |
| fig 6666666.474<br>865.peg.2230 | Chromosome partition protein smc                                                                                  |  | -0.565  | -0.251 | -0.203   | 0.112   | 0.183    | 0.718 | 0.589    | 0.767    |
| fig 6666666.474<br>865.peg.2300 | Glutathione peroxidase family protein                                                                             |  | 0.495   | -0.253 | 0.323    | -0.425  | 0.256    | 0.727 | 0.371    | 0.229    |
| fig 6666666.474<br>865.peg.1568 | Putative ATP:guanido phosphotransferase YacI (EC 2.7.3.-)                                                         |  | 0.136   | -0.254 | 0.562    | 0.172   | 0.926    | 0.921 | 0.577    | 0.87     |
| fig 6666666.474<br>865.peg.63   | 1-acyl-sn-glycerol-3-phosphate acyltransferase (EC 2.3.1.51)                                                      |  | -0.191  | -0.259 | -0.697   | -0.765  | 0.508    | 0.529 | 0.00499  | 0.00309  |
| fig 6666666.474<br>865.peg.1930 | probable iron binding protein from the HesB_IscA_SufA family                                                      |  | 0.459   | -0.26  | -0.0276  | -0.746  | 0.311    | 0.727 | 0.954    | 0.0454   |
| fig 6666666.474<br>865.peg.2307 | FIG01108533: hypothetical protein                                                                                 |  | -0.44   | -0.26  | -1.33    | -1.14   | 0.68     | 0.903 | 0.091    | 0.142    |
| fig 6666666.474<br>865.peg.733  | hypothetical protein similar to TpgX                                                                              |  | -0.213  | -0.261 | -1.02    | -1.07   | 0.594    | 0.66  | 0.00277  | 0.00222  |
| fig 6666666.474<br>865.peg.908  | ATP-dependent protease ATP-binding subunit clpL                                                                   |  | -0.995  | -0.265 | -0.618   | 0.112   | 0.000242 | 0.399 | 0.00158  | 0.511    |
| fig 6666666.474<br>865.peg.2288 | tRNA-i(6)A37 methyltransferase                                                                                    |  | -0.164  | -0.267 | -0.0773  | -0.18   | 0.604    | 0.536 | 0.78     | 0.447    |
| fig 6666666.474<br>865.peg.905  | Hydroxymethylglutaryl-CoA reductase (EC 1.1.1.34)                                                                 |  | -0.116  | -0.27  | -0.337   | -0.491  | 0.666    | 0.437 | 0.0852   | 0.0177   |

|                                 |                                                                                                                      |         |         |        |          |         |          |       |          |          |
|---------------------------------|----------------------------------------------------------------------------------------------------------------------|---------|---------|--------|----------|---------|----------|-------|----------|----------|
| fig 6666666.474<br>865.peg.2146 | Glutamate racemase (EC 5.1.1.3)                                                                                      | murI    | -0.226  | -0.274 | 0.515    | 0.467   | 0.245    | 0.369 | 0.00406  | 0.00781  |
| fig 6666666.474<br>865.peg.266  | Nitric oxide synthase oxygenase (EC 1.-.-.-)                                                                         |         | -0.498  | -0.274 | -1.2     | -0.975  | 0.35     | 0.772 | 0.00936  | 0.0288   |
| fig 6666666.474<br>865.peg.449  | Cardiolipin synthetase (EC 2.7.8.-)                                                                                  |         | 0.185   | -0.276 | 0.394    | -0.0665 | 0.658    | 0.637 | 0.191    | 0.847    |
| fig 6666666.474<br>865.peg.2728 | Protein-export membrane protein SecD (TC 3.A.5.1.1) / Protein-export membrane protein SecF (TC 3.A.5.1.1)            |         | 0.526   | -0.281 | 0.174    | -0.634  | 0.0696   | 0.513 | 0.469    | 0.0118   |
| fig 6666666.474<br>865.peg.631  | Molybdopterin biosynthesis protein MoeA                                                                              |         | -1      | -0.282 | -1.27    | -0.552  | 0.00245  | 0.506 | 6.30E-05 | 0.0222   |
| fig 6666666.474<br>865.peg.1892 | Thioredoxin                                                                                                          |         | 0.118   | -0.285 | -0.0895  | -0.492  | 0.647    | 0.419 | 0.668    | 0.0145   |
| fig 6666666.474<br>865.peg.2089 | Peptide deformylase (EC 3.5.1.88)                                                                                    |         | 0.0509  | -0.289 | 0.681    | 0.341   | 0.812    | 0.323 | 0.000407 | 0.0338   |
| fig 6666666.474<br>865.peg.1754 | Cadmium-transporting ATPase (EC 3.6.3.3)                                                                             |         | -0.0455 | -0.29  | 0.204    | -0.0403 | 0.967    | 0.89  | 0.831    | 0.962    |
| fig 6666666.474<br>865.peg.236  | Transporter associated with VraSR                                                                                    | vraT    | 1.18    | -0.294 | 3.88     | 2.41    | 0.15     | 0.853 | 4.07E-05 | 0.00224  |
| fig 6666666.474<br>865.peg.222  | Transcription regulator CDS_ID OB0894                                                                                |         | 0.033   | -0.294 | -0.00524 | -0.332  | 0.967    | 0.82  | 0.995    | 0.572    |
| fig 6666666.474<br>865.peg.451  | Inner membrane protein translocase component YidC, short form Oxal-like                                              | yidC    | 0.712   | -0.295 | 1.62     | 0.609   | 0.0745   | 0.635 | 0.00013  | 0.0598   |
| fig 6666666.474<br>865.peg.2496 | 3-dehydroquinate synthase (EC 4.2.3.4)                                                                               |         | -0.391  | -0.295 | 0.316    | 0.412   | 0.615    | 0.82  | 0.611    | 0.482    |
| fig 6666666.474<br>865.peg.883  | D-lactate dehydrogenase (EC 1.1.1.28)                                                                                |         | -0.59   | -0.295 | -0.154   | 0.142   | 0.0197   | 0.419 | 0.438    | 0.471    |
| fig 6666666.474<br>865.peg.2362 | HMP-PP hydrolase (pyridoxal phosphatase) Cof, detected in genetic screen for thiamin metabolic genes (PMID:15292217) |         | -0.294  | -0.297 | -0.507   | -0.51   | 0.137    | 0.324 | 0.00468  | 0.00486  |
| fig 6666666.474<br>865.peg.1795 | Queuosine Biosynthesis QueE Radical SAM                                                                              |         | -0.894  | -0.3   | -0.686   | -0.0923 | 0.0657   | 0.703 | 0.0766   | 0.834    |
| fig 6666666.474<br>865.peg.190  | Foldase protein PrsA precursor (EC 5.2.1.8) @ Foldase clustered with pyrimidine conversion                           | prsA    | 1.1     | -0.302 | 2.64     | 1.24    | 2.08E-05 | 0.225 | 1.69E-10 | 1.43E-06 |
| fig 6666666.474<br>865.peg.2212 | Methionyl-tRNA formyltransferase (EC 2.1.2.9)                                                                        | fmt     | -1.06   | -0.302 | -1.13    | -0.373  | 0.313    | 0.891 | 0.181    | 0.68     |
| fig 6666666.474<br>865.peg.2234 | SSU ribosomal protein S16p                                                                                           |         | 0.0578  | -0.302 | 0.00182  | -0.358  | 0.916    | 0.687 | 0.996    | 0.326    |
| fig 6666666.474<br>865.peg.290  | Extracellular adherence protein of broad specificity Eap/Map                                                         | eap/map | -2.35   | -0.305 | -2.02    | 0.0277  | 0.0137   | 0.859 | 0.00887  | 0.973    |
| fig 6666666.474<br>865.peg.2689 | 5'-methylthioadenosine nucleosidase (EC 3.2.2.16) / S-adenosylhomocysteine nucleosidase (EC 3.2.2.9)                 |         | -0.637  | -0.311 | 0.0734   | 0.4     | 0.0024   | 0.245 | 0.645    | 0.0109   |
| fig 6666666.474<br>865.peg.232  | FIG010063: hypothetical protein                                                                                      |         | -0.176  | -0.316 | -1.44    | -1.58   | 0.849    | 0.831 | 0.0304   | 0.0209   |
| fig 6666666.474<br>865.peg.1589 | SSU ribosomal protein S12p (S23e)                                                                                    |         | 0.194   | -0.317 | -0.133   | -0.644  | 0.777    | 0.773 | 0.825    | 0.193    |
| fig 6666666.474<br>865.peg.1230 | Malonyl CoA-acyl carrier protein transacylase (EC 2.3.1.39)                                                          |         | -0.492  | -0.318 | 1.86     | 2.04    | 0.544    | 0.82  | 0.00649  | 0.00406  |

|                                 |                                                                                                                                  |      |          |        |        |         |         |       |          |          |
|---------------------------------|----------------------------------------------------------------------------------------------------------------------------------|------|----------|--------|--------|---------|---------|-------|----------|----------|
| fig/6666666.474<br>865.peg.2256 | Undecaprenyl diphosphate synthase (EC 2.5.1.31)                                                                                  |      | 0.672    | -0.318 | 1.68   | 0.688   | 0.13    | 0.653 | 0.000252 | 0.0578   |
| fig/6666666.474<br>865.peg.1088 | Seryl-tRNA synthetase (EC 6.1.1.11)                                                                                              |      | -0.325   | -0.322 | -0.85  | -0.846  | 0.0315  | 0.167 | 6.62E-06 | 1.31E-05 |
| fig/6666666.474<br>865.peg.2213 | Ribosomal RNA small subunit methyltransferase B (EC 2.1.1.-)                                                                     |      | 0.0608   | -0.322 | 0.505  | 0.122   | 0.832   | 0.401 | 0.0183   | 0.566    |
| fig/6666666.474<br>865.peg.2291 | DNA mismatch repair protein MutS                                                                                                 |      | -0.191   | -0.322 | 0.0736 | -0.0569 | 0.726   | 0.699 | 0.879    | 0.896    |
| fig/6666666.474<br>865.peg.506  | Mannose-6-phosphate isomerase, class I (EC 5.3.1.8)                                                                              |      | -0.0988  | -0.326 | -0.668 | -0.895  | 0.724   | 0.401 | 0.00409  | 0.000621 |
| fig/6666666.474<br>865.peg.1793 | FIG01107853: hypothetical protein                                                                                                | saeP | -1.07    | -0.327 | 0.268  | 1.01    | 0.00175 | 0.433 | 0.249    | 0.000621 |
| fig/6666666.474<br>865.peg.234  | Two component transcriptional regulator VraR                                                                                     | vraR | 0.479    | -0.328 | 2.85   | 2.04    | 0.0619  | 0.399 | 6.63E-09 | 5.89E-07 |
| fig/6666666.474<br>865.peg.2396 | Deblocking aminopeptidase (EC 3.4.11.-)                                                                                          |      | 0.204    | -0.329 | 0.204  | -0.328  | 0.492   | 0.432 | 0.38     | 0.154    |
| fig/6666666.474<br>865.peg.2476 | Cell division protein GpsB, coordinates the switch between cylindrical and septal cell wall synthesis by re-localization of PBP1 |      | -0.379   | -0.331 | -0.658 | -0.61   | 0.382   | 0.604 | 0.0566   | 0.0757   |
| fig/6666666.474<br>865.peg.1593 | N-acetyl-L,L-diaminopimelate deacetylase (EC 3.5.1.47)                                                                           |      | -1.98    | -0.332 | -1.38  | 0.269   | 0.0173  | 0.82  | 0.0322   | 0.692    |
| fig/6666666.474<br>865.peg.606  | LSU ribosomal protein L2p (L8e)                                                                                                  |      | 8.77E-05 | -0.332 | 0.086  | -0.246  | 0.999   | 0.29  | 0.636    | 0.138    |
| fig/6666666.474<br>865.peg.960  | L-lactate dehydrogenase (EC 1.1.1.27)                                                                                            |      | -0.667   | -0.332 | -1.12  | -0.783  | 0.0258  | 0.432 | 0.000198 | 0.00344  |
| fig/6666666.474<br>865.peg.591  | LSU ribosomal protein L30p (L7e)                                                                                                 |      | 0.146    | -0.336 | -0.419 | -0.901  | 0.699   | 0.519 | 0.135    | 0.00469  |
| fig/6666666.474<br>865.peg.1364 | N-acetylmannosamine-6-phosphate 2-epimerase (EC 5.1.3.9)                                                                         |      | -0.298   | -0.34  | 0.373  | 0.331   | 0.691   | 0.776 | 0.527    | 0.568    |
| fig/6666666.474<br>865.peg.76   | MaebI                                                                                                                            |      | -0.269   | -0.341 | -0.487 | -0.558  | 0.324   | 0.417 | 0.0304   | 0.0172   |
| fig/6666666.474<br>865.peg.1191 | Phosphopentomutase (EC 5.4.2.7)                                                                                                  |      | -0.19    | -0.342 | 0.025  | -0.127  | 0.211   | 0.167 | 0.865    | 0.312    |
| fig/6666666.474<br>865.peg.1305 | Nitric oxide-dependent regulator DnrN or NorA                                                                                    | scdA | -0.588   | -0.345 | -1.38  | -1.14   | 0.0457  | 0.422 | 3.58E-05 | 0.000262 |
| fig/6666666.474<br>865.peg.2121 | Phosphopantetheine adenylyltransferase (EC 2.7.7.3)                                                                              |      | -0.753   | -0.35  | 0.186  | 0.589   | 0.395   | 0.826 | 0.825    | 0.406    |
| fig/6666666.474<br>865.peg.1849 | Thioredoxin reductase (EC 1.8.1.9)                                                                                               |      | -0.194   | -0.354 | -0.154 | -0.314  | 0.211   | 0.167 | 0.223    | 0.0192   |
| fig/6666666.474<br>865.peg.2374 | UPF0154 membrane protein YoxG                                                                                                    |      | -0.0435  | -0.355 | 0.467  | 0.156   | 0.915   | 0.46  | 0.0805   | 0.571    |
| fig/6666666.474<br>865.peg.855  | Phosphoglucosamine mutase (EC 5.4.2.10) / Phosphomannomutase (EC 5.4.2.8)                                                        |      | -0.182   | -0.365 | -0.32  | -0.503  | 0.643   | 0.48  | 0.259    | 0.0775   |
| fig/6666666.474<br>865.peg.1165 | staphylococcal accessory regulator A homologue                                                                                   | sarS | -0.401   | -0.371 | -0.547 | -0.517  | 0.157   | 0.399 | 0.0232   | 0.0328   |
| fig/6666666.474<br>865.peg.2711 | RecD-like DNA helicase YrrC                                                                                                      |      | -0.864   | -0.373 | -0.4   | 0.0918  | 0.232   | 0.774 | 0.524    | 0.889    |

|                                 |                                                                                                                      |      |        |        |        |         |       |       |          |         |
|---------------------------------|----------------------------------------------------------------------------------------------------------------------|------|--------|--------|--------|---------|-------|-------|----------|---------|
| fig/6666666.474<br>865.peg.2379 | Glycine betaine transporter OpuD                                                                                     |      | 0.344  | -0.378 | 0.696  | -0.0259 | 0.395 | 0.525 | 0.033    | 0.938   |
| fig/6666666.474<br>865.peg.47   | Universal stress protein family                                                                                      |      | -0.281 | -0.383 | -0.292 | -0.394  | 0.138 | 0.201 | 0.0594   | 0.0164  |
| fig/6666666.474<br>865.peg.719  | Teicoplanin-resistance associated HTH-type transcriptional regulator TcaR                                            |      | 0.0982 | -0.383 | -0.109 | -0.59   | 0.725 | 0.324 | 0.631    | 0.0092  |
| fig/6666666.474<br>865.peg.389  | Heat shock protein 60 family co-chaperone GroES                                                                      |      | -0.147 | -0.388 | 0.508  | 0.266   | 0.691 | 0.432 | 0.0625   | 0.33    |
| fig/6666666.474<br>865.peg.1801 | Allophanate hydrolase 2 subunit 1 (EC 3.5.1.54)                                                                      |      | 0.278  | -0.39  | 1.29   | 0.626   | 0.677 | 0.699 | 0.0127   | 0.194   |
| fig/6666666.474<br>865.peg.2736 | LSU ribosomal protein L27p                                                                                           |      | 0.506  | -0.396 | -0.766 | -1.67   | 0.421 | 0.695 | 0.115    | 0.00314 |
| fig/6666666.474<br>865.peg.1993 | Negative regulator of genetic competence MecA                                                                        | trfa | -0.299 | -0.396 | 0.81   | 0.713   | 0.336 | 0.399 | 0.00407  | 0.0092  |
| fig/6666666.474<br>865.peg.2005 | Enoyl-[acyl-carrier-protein] reductase [NADH] (EC 1.3.1.9)                                                           |      | 0.167  | -0.399 | 0.852  | 0.286   | 0.42  | 0.201 | 8.79E-05 | 0.0765  |
| fig/6666666.474<br>865.peg.77   | Pyridoxamine 5'-phosphate oxidase (EC 1.4.3.5)                                                                       |      | -0.369 | -0.401 | -0.519 | -0.551  | 0.139 | 0.303 | 0.0154   | 0.0118  |
| fig/6666666.474<br>865.peg.1802 | Allophanate hydrolase 2 subunit 2 (EC 3.5.1.54)                                                                      |      | -0.167 | -0.41  | 0.211  | -0.032  | 0.661 | 0.422 | 0.464    | 0.915   |
| fig/6666666.474<br>865.peg.575  | LSU ribosomal protein L13p (L13Ae)                                                                                   |      | 0.302  | -0.41  | 0.363  | -0.349  | 0.277 | 0.339 | 0.108    | 0.124   |
| fig/6666666.474<br>865.peg.1    | Dihydrofolate synthase (EC 6.3.2.12) / Folylpolyglutamate synthase (EC 6.3.2.17)                                     |      | -0.175 | -0.415 | -0.747 | -0.987  | 0.68  | 0.459 | 0.021    | 0.00486 |
| fig/6666666.474<br>865.peg.2381 | 4-hydroxybenzoyl-CoA thioesterase family active site                                                                 |      | 0.0712 | -0.416 | 0.573  | 0.0859  | 0.962 | 0.831 | 0.525    | 0.923   |
| fig/6666666.474<br>865.peg.712  | FIG01108339: hypothetical protein                                                                                    |      | -0.509 | -0.417 | 0.395  | 0.486   | 0.502 | 0.727 | 0.527    | 0.416   |
| fig/6666666.474<br>865.peg.731  | L-lactate permease                                                                                                   |      | 0.0513 | -0.418 | 0.525  | 0.0559  | 0.924 | 0.503 | 0.118    | 0.884   |
| fig/6666666.474<br>865.peg.514  | HMP-PP hydrolase (pyridoxal phosphatase) Cof, detected in genetic screen for thiamin metabolic genes (PMID:15292217) |      | -0.193 | -0.42  | 0.271  | 0.0438  | 0.517 | 0.335 | 0.237    | 0.868   |
| fig/6666666.474<br>865.peg.589  | Preprotein translocase secY subunit (TC 3.A.5.1.1)                                                                   |      | 0.842  | -0.422 | 3.2    | 1.93    | 0.256 | 0.735 | 9.37E-05 | 0.00486 |
| fig/6666666.474<br>865.peg.2724 | D-tyrosyl-tRNA(Tyr) deacylase (EC 3.6.1.n1)                                                                          |      | 0.0154 | -0.422 | 0.248  | -0.19   | 0.967 | 0.364 | 0.307    | 0.441   |
| fig/6666666.474<br>865.peg.1280 | FIG01108038: hypothetical protein                                                                                    |      | -0.499 | -0.435 | -0.618 | -0.554  | 0.15  | 0.419 | 0.0323   | 0.0533  |
| fig/6666666.474<br>865.peg.2727 | Single-stranded-DNA-specific exonuclease RecJ (EC 3.1.-.-)                                                           |      | -0.459 | -0.435 | 0.871  | 0.894   | 0.466 | 0.653 | 0.0766   | 0.0695  |
| fig/6666666.474<br>865.peg.1610 | GTP cyclohydrolase I (EC 3.5.4.16) type 2                                                                            |      | 0.17   | -0.436 | 1.28   | 0.67    | 0.64  | 0.389 | 0.000166 | 0.0161  |
| fig/6666666.474<br>865.peg.1623 | Hydroxymethylpyrimidine phosphate kinase ThiD (EC 2.7.4.7)                                                           |      | 0.232  | -0.439 | 0.124  | -0.547  | 0.173 | 0.113 | 0.38     | 0.00124 |
| fig/6666666.474<br>865.peg.2389 | FmtC (MrpF) protein involved in methicillin resistance / L-lysine modification of phosphatidylglycerol               |      | 0.21   | -0.446 | 0.0031 | -0.653  | 0.822 | 0.749 | 0.996    | 0.325   |

|                                 |                                                                                                                                |  |         |        |         |          |         |       |          |          |
|---------------------------------|--------------------------------------------------------------------------------------------------------------------------------|--|---------|--------|---------|----------|---------|-------|----------|----------|
| fig/6666666.474<br>865.peg.918  | Lead, cadmium, zinc and mercury transporting ATPase (EC 3.6.3.3) (EC 3.6.3.5); Copper-translocating P-type ATPase (EC 3.6.3.4) |  | -0.72   | -0.452 | -0.146  | 0.123    | 0.331   | 0.708 | 0.839    | 0.86     |
| fig/6666666.474<br>865.peg.1812 | Di/tripeptide permease YjdL                                                                                                    |  | -0.361  | -0.456 | 2.09    | 2        | 0.552   | 0.596 | 0.000325 | 0.000635 |
| fig/6666666.474<br>865.peg.773  | Candidate zinc-binding lipoprotein ZinT                                                                                        |  | 0.442   | -0.459 | -1.06   | -1.96    | 0.527   | 0.673 | 0.0503   | 0.002    |
| fig/6666666.474<br>865.peg.2487 | Biotin operon repressor / Biotin-protein ligase (EC 6.3.4.15)                                                                  |  | 0.222   | -0.465 | 0.952   | 0.266    | 0.672   | 0.508 | 0.0172   | 0.494    |
| fig/6666666.474<br>865.peg.1434 | Hypothetical SAV0801 homolog in superantigen-encoding pathogenicity islands SaPI                                               |  | 0.0689  | -0.466 | -0.494  | -1.03    | 0.871   | 0.399 | 0.0929   | 0.00262  |
| fig/6666666.474<br>865.peg.1297 | 2-C-methyl-D-erythritol 4-phosphate cytidyltransferase (EC 2.7.7.60)                                                           |  | -0.394  | -0.468 | -0.426  | -0.5     | 0.691   | 0.772 | 0.59     | 0.504    |
| fig/6666666.474<br>865.peg.2666 | SSU ribosomal protein S21p                                                                                                     |  | -0.0517 | -0.469 | -1.79   | -2.2     | 0.966   | 0.774 | 0.0228   | 0.00816  |
| fig/6666666.474<br>865.peg.2173 | BH2577 unknown conserved protein in B. subtilis                                                                                |  | 0.0749  | -0.471 | -0.0235 | -0.569   | 0.791   | 0.225 | 0.927    | 0.0111   |
| fig/6666666.474<br>865.peg.2382 | FIG01108262: hypothetical protein                                                                                              |  | 0.107   | -0.479 | 2.24    | 1.66     | 0.849   | 0.511 | 4.85E-05 | 0.000771 |
| fig/6666666.474<br>865.peg.818  | Carboxylesterase type B (EC 3.1.1.-)                                                                                           |  | -1.16   | -0.484 | 0.272   | 0.945    | 0.306   | 0.819 | 0.802    | 0.302    |
| fig/6666666.474<br>865.peg.1827 | Glycerate kinase (EC 2.7.1.31)                                                                                                 |  | 0.489   | -0.489 | 0.675   | -0.303   | 0.118   | 0.323 | 0.0127   | 0.227    |
| fig/6666666.474<br>865.peg.746  | AraC family regulatory protein                                                                                                 |  | 0.0816  | -0.489 | 1.76    | 1.19     | 0.962   | 0.82  | 0.0634   | 0.204    |
| fig/6666666.474<br>865.peg.2324 | FIG01107943: hypothetical protein                                                                                              |  | 0.219   | -0.49  | -1.98   | -2.69    | 0.799   | 0.703 | 0.00473  | 0.000674 |
| fig/6666666.474<br>865.peg.128  | oxidoreductase of aldo/keto reductase family, subgroup 1                                                                       |  | 0.0184  | -0.494 | 0.506   | -0.00722 | 0.965   | 0.323 | 0.0503   | 0.98     |
| fig/6666666.474<br>865.peg.637  | Molybdenum ABC transporter, periplasmic molybdenum-binding protein ModA (TC 3.A.1.8.1)                                         |  | -2.35   | -0.496 | -3.91   | -2.06    | 0.016   | 0.749 | 8.34E-05 | 0.00997  |
| fig/6666666.474<br>865.peg.411  | TsaB protein, required for threonylcarbamoyladenosine (t(6)A) formation in tRNA                                                |  | -0.192  | -0.502 | 0.571   | 0.261    | 0.744   | 0.536 | 0.195    | 0.568    |
| fig/6666666.474<br>865.peg.681  | Hypothetical protein SAV2322                                                                                                   |  | 2.38    | -0.507 | 7.48    | 4.6      | 0.0197  | 0.77  | 5.21E-07 | 5.83E-05 |
| fig/6666666.474<br>865.peg.1446 | FIG01109315: hypothetical protein                                                                                              |  | -2.13   | -0.511 | -0.551  | 1.07     | 0.0366  | 0.772 | 0.513    | 0.179    |
| fig/6666666.474<br>865.peg.393  | Aliphatic amidase AmiE (EC 3.5.1.4)                                                                                            |  | -0.624  | -0.52  | 0.191   | 0.294    | 0.11    | 0.389 | 0.577    | 0.357    |
| fig/6666666.474<br>865.peg.633  | Molybdenum cofactor biosynthesis protein MoaB                                                                                  |  | -1.78   | -0.523 | -2      | -0.745   | 0.00152 | 0.433 | 7.99E-05 | 0.0498   |
| fig/6666666.474<br>865.peg.993  | Carbamate kinase (EC 2.7.2.2)                                                                                                  |  | -3.32   | -0.523 | -0.13   | 2.67     | 0.00499 | 0.774 | 0.901    | 0.00494  |
| fig/6666666.474<br>865.peg.576  | tRNA pseudouridine synthase A (EC 4.2.1.70)                                                                                    |  | 0.148   | -0.523 | 0.0498  | -0.621   | 0.909   | 0.774 | 0.961    | 0.472    |
| fig/6666666.474<br>865.peg.1806 | Glycine betaine ABC transport system, ATP-binding protein OpuAA (EC 3.6.3.32)                                                  |  | -0.13   | -0.528 | -0.0813 | -0.478   | 0.691   | 0.225 | 0.774    | 0.0504   |



|                                 |                                                                                                                                                              |       |         |        |         |         |          |        |          |          |
|---------------------------------|--------------------------------------------------------------------------------------------------------------------------------------------------------------|-------|---------|--------|---------|---------|----------|--------|----------|----------|
| fig/6666666.474<br>865.peg.2285 | 2-oxoglutarate oxidoreductase, alpha subunit (EC 1.2.7.3)                                                                                                    |       | -0.716  | -0.537 | -1.68   | -1.51   | 0.672    | 0.855  | 0.17     | 0.218    |
| fig/6666666.474<br>865.peg.836  | Oxidoreductase, short chain dehydrogenase/reductase family                                                                                                   |       | 0.477   | -0.542 | 0.0921  | -0.928  | 0.674    | 0.761  | 0.927    | 0.257    |
| fig/6666666.474<br>865.peg.2126 | Cell surface protein IsdA, transfers heme from hemoglobin to apo-IsdC                                                                                        |       | -0.332  | -0.547 | -0.184  | -0.399  | 0.734    | 0.708  | 0.835    | 0.607    |
| fig/6666666.474<br>865.peg.2454 | Peptide methionine sulfoxide reductase MsrA (EC 1.8.4.11)                                                                                                    | msrA1 | 1.59    | -0.556 | 4.9     | 2.76    | 0.00808  | 0.491  | 9.16E-08 | 3.53E-05 |
| fig/6666666.474<br>865.peg.599  | LSU ribosomal protein L14p (L23e)                                                                                                                            |       | -0.0609 | -0.559 | 0.338   | -0.161  | 0.893    | 0.323  | 0.257    | 0.608    |
| fig/6666666.474<br>865.peg.1441 | FIG01107864: hypothetical protein                                                                                                                            |       | -2.53   | -0.56  | -1.21   | 0.754   | 0.000966 | 0.537  | 0.0194   | 0.129    |
| fig/6666666.474<br>865.peg.184  | ABC transporter, permease protein EscB                                                                                                                       |       | 0.0445  | -0.567 | 2.07    | 1.46    | 0.967    | 0.718  | 0.013    | 0.0632   |
| fig/6666666.474<br>865.peg.503  | Hypothetical protein SAV2140                                                                                                                                 |       | 0.0137  | -0.572 | 0.718   | 0.132   | 0.967    | 0.225  | 0.00877  | 0.615    |
| fig/6666666.474<br>865.peg.1637 | Putative Dihydropolipoamide dehydrogenase (EC 1.8.1.4); Mercuric ion reductase (EC 1.16.1.1); PF00070 family, FAD-dependent NAD(P)-disulphide oxidoreductase |       | -0.356  | -0.58  | 0.551   | 0.327   | 0.193    | 0.181  | 0.0192   | 0.145    |
| fig/6666666.474<br>865.peg.598  | LSU ribosomal protein L24p (L26e)                                                                                                                            |       | 0.18    | -0.595 | -1.03   | -1.81   | 0.794    | 0.525  | 0.0439   | 0.00229  |
| fig/6666666.474<br>865.peg.759  | Sensor protein DegS                                                                                                                                          |       | -0.15   | -0.596 | 1.42    | 0.974   | 0.901    | 0.708  | 0.0777   | 0.221    |
| fig/6666666.474<br>865.peg.1430 | ORF007                                                                                                                                                       |       | 0.0447  | -0.601 | -1.65   | -2.3    | 0.971    | 0.77   | 0.0766   | 0.0193   |
| fig/6666666.474<br>865.peg.2103 | Manganese transport protein MntH                                                                                                                             |       | 0.383   | -0.606 | 3.48    | 2.49    | 0.481    | 0.432  | 1.88E-06 | 5.83E-05 |
| fig/6666666.474<br>865.peg.2641 | LSU ribosomal protein L33p @ LSU ribosomal protein L33p, zinc-dependent                                                                                      |       | -0.105  | -0.607 | -0.218  | -0.72   | 0.726    | 0.167  | 0.33     | 0.00463  |
| fig/6666666.474<br>865.peg.718  | Teicoplanin resistance associated membrane protein TcaA                                                                                                      | tcaA  | 1.41    | -0.613 | 3.42    | 1.39    | 0.0451   | 0.538  | 2.51E-05 | 0.0177   |
| fig/6666666.474<br>865.peg.751  | FIG01108216: hypothetical protein                                                                                                                            |       | 0.0691  | -0.618 | 0.606   | -0.0813 | 0.871    | 0.26   | 0.0424   | 0.805    |
| fig/6666666.474<br>865.peg.235  | Sensor histidine kinase VraS                                                                                                                                 | vraS  | 1.43    | -0.631 | 5.39    | 3.33    | 0.0197   | 0.458  | 7.53E-08 | 1.31E-05 |
| fig/6666666.474<br>865.peg.978  | Sulfite reductase [NADPH] flavoprotein alpha-component (EC 1.8.1.2)                                                                                          |       | -0.0119 | -0.638 | 1.59    | 0.966   | 0.984    | 0.497  | 0.00479  | 0.059    |
| fig/6666666.474<br>865.peg.2390 | Peptide methionine sulfoxide reductase MsrA (EC 1.8.4.11)                                                                                                    | msrA2 | -0.663  | -0.649 | -0.287  | -0.274  | 0.0258   | 0.167  | 0.215    | 0.233    |
| fig/6666666.474<br>865.peg.158  | LSU ribosomal protein L33p @ LSU ribosomal protein L33p, zinc-dependent                                                                                      |       | -0.519  | -0.659 | 0.473   | 0.333   | 0.0323   | 0.0751 | 0.0179   | 0.0805   |
| fig/6666666.474<br>865.peg.1992 | Regulatory protein spx                                                                                                                                       | spx   | -0.174  | -0.661 | -2.2    | -2.68   | 0.749    | 0.397  | 7.82E-05 | 2.60E-05 |
| fig/6666666.474<br>865.peg.2280 | N-terminal domain of CinA protein, COG1058                                                                                                                   |       | -0.458  | -0.665 | -0.0594 | -0.266  | 0.691    | 0.702  | 0.956    | 0.774    |

|                                 |                                                                                                     |     |         |        |          |        |         |       |          |         |
|---------------------------------|-----------------------------------------------------------------------------------------------------|-----|---------|--------|----------|--------|---------|-------|----------|---------|
| fig/6666666.474<br>865.peg.1496 | FIG01108316: hypothetical protein                                                                   |     | -0.349  | -0.684 | 0.703    | 0.368  | 0.453   | 0.323 | 0.0542   | 0.312   |
| fig/6666666.474<br>865.peg.2101 | FIG01108899: hypothetical protein                                                                   |     | 0.316   | -0.693 | 1.78     | 0.767  | 0.685   | 0.512 | 0.0051   | 0.177   |
| fig/6666666.474<br>865.peg.1157 | hypothetical protein                                                                                |     | 0.457   | -0.7   | -0.00749 | -1.16  | 0.721   | 0.708 | 0.996    | 0.214   |
| fig/6666666.474<br>865.peg.1547 | Transcription-repair coupling factor                                                                | mfd | 0.596   | -0.706 | 1.4      | 0.0936 | 0.187   | 0.323 | 0.00138  | 0.824   |
| fig/6666666.474<br>865.peg.535  | Hypothetical protein SAV2173                                                                        |     | -0.561  | -0.758 | -0.84    | -1.04  | 0.39    | 0.422 | 0.102    | 0.0486  |
| fig/6666666.474<br>865.peg.593  | LSU ribosomal protein L18p (L5e)                                                                    |     | -0.28   | -0.78  | -0.734   | -1.23  | 0.723   | 0.459 | 0.208    | 0.0401  |
| fig/6666666.474<br>865.peg.1263 | FIG01107841: hypothetical protein                                                                   |     | -0.0348 | -0.812 | 1.31     | 0.534  | 0.967   | 0.503 | 0.0485   | 0.421   |
| fig/6666666.474<br>865.peg.2732 | Holliday junction DNA helicase RuvB                                                                 |     | -0.452  | -0.836 | -0.157   | -0.542 | 0.394   | 0.29  | 0.745    | 0.19    |
| fig/6666666.474<br>865.peg.919  | Copper(I) chaperone CopZ                                                                            |     | 0.161   | -0.839 | 0.0348   | -0.965 | 0.828   | 0.399 | 0.957    | 0.0641  |
| fig/6666666.474<br>865.peg.1729 | Arsenate reductase (EC 1.20.4.1)                                                                    |     | 0.743   | -0.903 | 1.02     | -0.63  | 0.644   | 0.704 | 0.392    | 0.608   |
| fig/6666666.474<br>865.peg.907  | Methylated-DNA--protein-cysteine methyltransferase (EC 2.1.1.63)                                    |     | -0.23   | -0.903 | -0.7     | -1.37  | 0.773   | 0.415 | 0.227    | 0.0243  |
| fig/6666666.474<br>865.peg.2378 | Large-conductance mechanosensitive channel                                                          |     | 0.66    | -0.929 | 0.895    | -0.694 | 0.626   | 0.619 | 0.367    | 0.488   |
| fig/6666666.474<br>865.peg.786  | IgG-binding protein SBI                                                                             | sbi | -2.68   | -0.94  | -1.97    | -0.232 | 0.0057  | 0.458 | 0.00905  | 0.762   |
| fig/6666666.474<br>865.peg.2468 | Alanine dehydrogenase (EC 1.4.1.1)                                                                  |     | -3.02   | -0.956 | -5.02    | -2.96  | 0.00718 | 0.525 | 2.51E-05 | 0.00212 |
| fig/6666666.474<br>865.peg.2467 | Threonine dehydratase, catabolic (EC 4.3.1.19)                                                      |     | -3.41   | -0.978 | -5.75    | -3.32  | 0.00492 | 0.536 | 1.20E-05 | 0.00137 |
| fig/6666666.474<br>865.peg.360  | Leukocidin LukF-PV                                                                                  |     | -1.32   | -1     | -1.44    | -1.13  | 0.15    | 0.458 | 0.0556   | 0.132   |
| fig/6666666.474<br>865.peg.2588 | Oxidoreductase, aldo/keto reductase family protein                                                  |     | -0.245  | -1.06  | 0.382    | -0.437 | 0.576   | 0.106 | 0.246    | 0.182   |
| fig/6666666.474<br>865.peg.2269 | SSU ribosomal protein S15p (S13e)                                                                   |     | -0.461  | -1.11  | 1.32     | 0.673  | 0.719   | 0.525 | 0.159    | 0.485   |
| fig/6666666.474<br>865.peg.478  | TsaC protein (YrdC-Sua5 domains) required for threonylcarbamoyladenine t(6)A37 modification in tRNA |     | 0.084   | -1.11  | 0.104    | -1.1   | 0.953   | 0.433 | 0.92     | 0.167   |
| fig/6666666.474<br>865.peg.806  | Na <sup>+</sup> /H <sup>+</sup> antiporter                                                          |     | 1.22    | -1.46  | 3.13     | 0.449  | 0.421   | 0.503 | 0.013    | 0.722   |

**Table S2. List of identified metabolites in the intracellular metabolite analysis.**

| Metabolite            | log2 fold change (MRSA with oxacillin / MSSA with oxacillin) | log2 fold change (MRSA/MSSA) | log2 fold change (MRSA with oxacillin/ MRSA) | log2 fold change (MSSA with oxacillin/MSSA) | adjusted p-value (MRSA with oxacillin/MSSA with oxacillin) | adjusted p-value (MRSA/MSSA) | adjusted p-value (MRSA with oxacillin/ MRSA) | adjusted p-value (MSSA with oxacillin/MSSA) |
|-----------------------|--------------------------------------------------------------|------------------------------|----------------------------------------------|---------------------------------------------|------------------------------------------------------------|------------------------------|----------------------------------------------|---------------------------------------------|
| Valine                | -0.11332                                                     | -0.00967                     | -1.7512                                      | 0.50119                                     | 0.02877                                                    | 0.46962                      | 0.020075                                     | 0.029431                                    |
| UTP                   | -0.12371                                                     | -0.24225                     | 0.85572                                      | -0.04843                                    | 0.37908                                                    | 0.049887                     | 0.24468                                      | 1                                           |
| Uridine               | -0.02306                                                     | 0.060758                     | -2.371                                       | 1.5785                                      | 1                                                          | 0.049887                     | 0.020075                                     | 0.029431                                    |
| Uracil                | 0.043418                                                     | 0.075147                     | -2.0625                                      | 1.839                                       | 0.71109                                                    | 0.14379                      | 0.020075                                     | 0.029431                                    |
| UMP                   | -0.11024                                                     | -1.1841                      | 4.0145                                       | -0.08042                                    | 0.070818                                                   | 0.053354                     | 0.023174                                     | 0.91309                                     |
| UDP                   | -0.12391                                                     | 0.052907                     | -1.0112                                      | -0.19161                                    | 0.02877                                                    | 0.19955                      | 0.020075                                     | 0.51014                                     |
| TTP                   | 0.005331                                                     | -0.02923                     | 0.34684                                      | -0.07189                                    | 1                                                          | 0.83235                      | 0.44365                                      | 1                                           |
| Tryptophan            | -0.09319                                                     | -0.0317                      | -1.2096                                      | 0.6458                                      | 0.02877                                                    | 0.058201                     | 0.020075                                     | 0.048714                                    |
| Threonine             | 0.59925                                                      | -0.46875                     | 0.21548                                      | 1.7718                                      | 0.60431                                                    | 0.19955                      | 0.87168                                      | 0.059358                                    |
| Thiamine-phosphate    | ND                                                           | -0.18079                     | ND                                           | 0.5407                                      | ND                                                         | 0.56495                      | ND                                           | 0.60823                                     |
| Taurine               | -0.25238                                                     | ND                           | ND                                           | -1.3111                                     | 0.60431                                                    | ND                           | ND                                           | 0.60823                                     |
| Succinyl-CoA          | 0.1856                                                       | -0.16785                     | -0.53064                                     | 0.47444                                     | 1                                                          | 1                            | 0.51323                                      | 0.78785                                     |
| Succinic acid         | -0.33729                                                     | 0.007495                     | -2.6189                                      | 0.33158                                     | 0.02877                                                    | 0.94912                      | 0.020075                                     | 0.085618                                    |
| s-Adenosyl-methionine | -1.1363                                                      | -0.12077                     | -3.5835                                      | 0.56918                                     | 0.033759                                                   | 0.049887                     | 0.023174                                     | 0.048714                                    |
| Riboflavin            | 1.1426                                                       | 1.0657                       | -0.88859                                     | 2.932                                       | 0.068974                                                   | 0.053354                     | 0.020075                                     | 0.60823                                     |
| Reduced glutathione   | ND                                                           | -0.55856                     | ND                                           | 2.5519                                      | ND                                                         | 0.32947                      | ND                                           | 0.35543                                     |
| Quinolate             | -0.35852                                                     | -0.7164                      | 1.6854                                       | 1.1744                                      | 0.6738                                                     | 0.17601                      | 0.51323                                      | 1                                           |
| Pyridoxine            | -0.02741                                                     | 0.25234                      | 0.60246                                      | -1.5796                                     | 0.8229                                                     | 0.19955                      | 0.17427                                      | 0.029431                                    |
| PRPP                  | 0.058086                                                     | -0.27601                     | 1.6257                                       | 0.86527                                     | 0.8229                                                     | 0.058201                     | 0.034127                                     | 0.78785                                     |
| Propionyl-CoA         | -0.09455                                                     | 0.11623                      | 0.16432                                      | -0.92752                                    | 0.51786                                                    | 1                            | 0.62794                                      | 0.13363                                     |
| Proline               | -0.0329                                                      | 0.002882                     | -2.1033                                      | 1.6199                                      | 0.070818                                                   | 1                            | 0.020075                                     | 0.029431                                    |
| Phenylalanine         | -0.06038                                                     | -0.00992                     | -0.77881                                     | 0.18122                                     | 0.02877                                                    | 0.29489                      | 0.020075                                     | 0.30501                                     |
| Orotate               | 0.1832                                                       | -0.03064                     | -1.0981                                      | 2.4973                                      | 0.070818                                                   | 0.94912                      | 0.32392                                      | 0.029431                                    |
| O-phosphoserine       | -0.08201                                                     | -0.1053                      | -0.54159                                     | -0.86474                                    | 1                                                          | 0.94799                      | 1                                            | 0.89808                                     |
| Nicotinamide          | 0.06396                                                      | 0.12652                      | 0.50256                                      | -0.88473                                    | 0.18413                                                    | 0.049887                     | 0.24468                                      | 0.048714                                    |

|                          |          |          |          |          |          |          |          |          |
|--------------------------|----------|----------|----------|----------|----------|----------|----------|----------|
| N-acetyl glutamine       | -0.07331 | -0.01551 | -0.93842 | 0.48169  | 0.070818 | 0.56495  | 0.020075 | 0.13363  |
| Methionine               | -0.11421 | -0.02816 | -1.555   | 0.69625  | 0.02877  | 0.14379  | 0.020075 | 0.029431 |
| Lysine                   | -0.21619 | -0.0752  | -3.5143  | 2.1614   | 0.02877  | 0.049887 | 0.020075 | 0.029431 |
| Leucine                  | -0.07899 | 0.001647 | -1.79    | 0.70191  | 0.02877  | 1        | 0.020075 | 0.029431 |
| Lactic acid              | -0.34444 | -0.0712  | -2.7698  | 0.83575  | 0.02877  | 0.14379  | 0.020075 | 0.085618 |
| ITP                      | -0.04697 | -0.07534 | -0.43172 | 0.26758  | 1        | 0.46962  | 0.74226  | 0.70635  |
| Inosine                  | -0.18073 | -0.10768 | -2.8056  | 2.512    | 0.02877  | 0.46962  | 0.020075 | 0.029431 |
| IDP                      | 0.003709 | -0.14521 | 0.27032  | 1.1174   | 1        | 0.36897  | 0.74226  | 0.78785  |
| Hypoxathine              | 0.029684 | 0.05517  | -0.60626 | 0.36731  | 0.18413  | 0.049887 | 0.020075 | 0.13363  |
| Homoserine               | -0.01627 | -0.27621 | 0.41059  | 0.39186  | 0.8229   | 0.093122 | 0.51323  | 0.20674  |
| Histidine                | -0.11467 | -0.08637 | -1.3505  | 1.1615   | 0.02877  | 0.058201 | 0.020075 | 0.029431 |
| Guanosine                | 0.087641 | 0.047485 | -0.68733 | 1.0028   | 0.044547 | 0.093122 | 0.065004 | 0.029431 |
| Guanine                  | -0.00582 | 0.087038 | 0.57287  | -1.3056  | 0.96303  | 0.19955  | 0.034127 | 0.029431 |
| GTP                      | -0.08545 | 0.050399 | -0.69339 | -0.17393 | 0.71109  | 0.56495  | 0.32392  | 0.70635  |
| GMP                      | -0.07392 | -0.58697 | 3.7629   | -1.8576  | 0.11789  | 0.16834  | 0.025256 | 0.029431 |
| Glutamine                | -0.44365 | -0.08842 | -4.3965  | 1.9154   | 0.02877  | 0.049887 | 0.020075 | 0.029431 |
| Glutamate                | -0.07992 | -0.00327 | -1.5945  | 0.59273  | 0.02877  | 0.94912  | 0.020075 | 0.029431 |
| GDP                      | 0.022825 | 0.02895  | 0.69113  | -1.5253  | 0.96303  | 1        | 0.17427  | 1        |
| Fumaric acid             | -0.16616 | 0.002625 | -0.59365 | -0.24616 | 0.070818 | 1        | 0.51323  | 0.70635  |
| Fuctose-1,6-bisphosphate | -0.2833  | -0.00711 | -0.66883 | -0.57013 | 0.37908  | 1        | 0.6794   | 0.70635  |
| Folate                   | 0.02577  | -0.37303 | 1.6611   | 0.88933  | 0.71109  | 0.14379  | 0.24468  | 0.91309  |
| FAD                      | -0.53103 | -0.50101 | -0.62064 | 0.24025  | 0.037053 | 0.055233 | 0.51323  | 0.30501  |
| Dihydrofolic acid        | 0.14765  | -0.44075 | 0.18765  | 1.2104   | 1        | 0.38437  | 0.46822  | 0.20674  |
| dGTP                     | -0.10377 | -0.0738  | -0.12283 | -0.28127 | 0.27913  | 0.69841  | 0.74226  | 0.78785  |
| dGMP                     | -0.07144 | 0.11811  | 0.53985  | 0.55627  | 0.96303  | 0.83235  | 0.87168  | 0.91309  |
| D-glucose-6-phosphate    | -0.24273 | -0.08448 | 0.39989  | -0.20246 | 1        | 0.94912  | 0.74226  | 1        |
| dGDP                     | 0.03618  | -0.22579 | 0.12913  | 0.32519  | 0.60431  | 0.56495  | 0.24468  | 0.78785  |
| Deoxyguanosine           | ND       | 0.027863 | -6.7824  | 5.6871   | ND       | 0.19955  | 0.020075 | 0.029431 |
| Deoxyadenosine           | 0.074216 | 0.030835 | -1.1305  | 1.5112   | 0.070818 | 0.093122 | 0.020075 | 0.029431 |

|                         |          |          |          |          |          |          |          |          |
|-------------------------|----------|----------|----------|----------|----------|----------|----------|----------|
| dCTP                    | -0.0772  | -0.04414 | 0.24272  | -0.77861 | 0.71109  | 0.69841  | 0.51323  | 0.60823  |
| dCDP                    | -0.51584 | -0.55258 | 0.86267  | 0.25979  | 0.36309  | 0.055233 | 1        | 0.70635  |
| dAMP                    | -0.88392 | -0.75817 | 2.5309   | -1.7325  | 0.035958 | 0.30214  | 0.52637  | 0.042454 |
| D2-phosphoglyceric acid | -0.31893 | -0.30898 | -1.5941  | 0.90994  | 0.60054  | 0.56495  | 0.59353  | 0.60823  |
| Cytosine                | 0.047119 | 0.10307  | -2.8565  | 2.2624   | 0.27913  | 0.049887 | 0.020075 | 0.029431 |
| Cystathionine           | -0.06469 | 0.008875 | -0.58216 | -0.14301 | 0.02877  | 0.83235  | 0.020075 | 0.78785  |
| Cyclic-AMP              | -0.54107 | -0.62288 | -2.2145  | 1.8006   | 0.14569  | 0.24312  | 0.51323  | 0.50668  |
| CTP                     | -0.00314 | -0.09165 | 0.72443  | 0.041959 | 0.8229   | 0.36897  | 0.62794  | 1        |
| CoA                     | 0.14085  | -0.00932 | 0.96912  | 0.10252  | 1        | 0.56495  | 0.24468  | 1        |
| CMP                     | -0.11214 | -1.5549  | 6.947    | -0.25197 | 0.02877  | 0.049887 | 0.020075 | 0.13363  |
| Citrulline              | -0.29266 | -0.09926 | -2.2161  | 0.43546  | 0.02877  | 0.058201 | 0.020075 | 0.41204  |
| Citrate                 | -0.12545 | -0.06981 | -0.7303  | 0.38307  | 0.02877  | 0.093122 | 0.020075 | 0.20674  |
| Choline                 | -0.02082 | 0.011793 | -3.4056  | 2.9267   | 0.60431  | 0.36897  | 0.020075 | 0.029431 |
| Carnitine               | -0.1444  | -0.13502 | 0.65976  | -0.83978 | 0.02877  | 0.049887 | 0.10859  | 0.029431 |
| Biotin                  | -0.25494 | ND       | ND       | -1.34    | 0.60431  | ND       | ND       | 0.60823  |
| ATP                     | -0.01878 | -0.0249  | -0.08303 | 0.041911 | 1        | 1        | 1        | 0.78785  |
| Aspartate               | -0.08858 | -0.01969 | -0.77688 | 0.11569  | 0.02877  | 0.29489  | 0.020075 | 0.51014  |
| Asparagine              | -0.36524 | -0.07809 | -3.0831  | 1.1799   | 0.02877  | 0.058201 | 0.020075 | 0.029431 |
| Arginine                | -0.04457 | -0.00448 | -1.8186  | 1.4839   | 0.070818 | 0.46962  | 0.020075 | 0.029431 |
| AMP                     | -0.19109 | -1.3953  | 6.3848   | -0.6493  | 0.02877  | 0.055233 | 0.025256 | 0.048714 |
| Ammonium persulfate APS | 0.11315  | -0.3506  | 1.2348   | -0.80726 | 1        | 0.59189  | 0.24468  | 0.76118  |
| alpha-ketoglutarate     | -0.87294 | -1.5254  | 4.8686   | -0.42862 | 0.035958 | 0.049887 | 0.27115  | 0.085618 |
| ADP-d-glucose           | -0.23662 | 0.013075 | -2.5834  | 0.53492  | 0.60431  | 1        | 0.27115  | 0.76118  |
| ADP                     | -0.16443 | 0.038613 | -1.8453  | 0.22765  | 0.02877  | 0.36897  | 0.020075 | 0.41204  |
| Adenosine               | 0.052482 | 0.034748 | -1.474   | 1.6658   | 0.044547 | 0.049887 | 0.020075 | 0.029431 |
| Adenine                 | 0.009166 | 0.051672 | -0.69641 | 0.19633  | 0.71109  | 0.049887 | 0.020075 | 0.51014  |
| Aconitate               | -0.50719 | -0.35898 | -0.29103 | 0.31105  | 0.078616 | 0.049887 | 0.51323  | 0.70635  |
| Acetylphosphate         | -0.37634 | 0.44373  | -0.8388  | -1.8367  | 0.56882  | 0.51685  | 0.48066  | 0.42598  |
| Acetyl-CoA              | -0.31081 | -0.1405  | -1.0883  | 0.85485  | 0.044547 | 0.19955  | 0.10859  | 0.30501  |

|                               |          |          |          |          |         |          |          |         |
|-------------------------------|----------|----------|----------|----------|---------|----------|----------|---------|
| Acetoacetyl-CoA               | 0.0883   | -0.17311 | 1.6792   | -0.45887 | 0.8229  | 1        | 0.17427  | 0.41204 |
| Acetoacetate                  | -0.15014 | ND       | ND       | -0.42329 | 0.60431 | ND       | ND       | 0.60823 |
| 6-phospho-D-gluconate         | -0.19865 | -0.90048 | 2.0094   | 1.3541   | 0.7769  | 0.085867 | 0.51323  | 0.42598 |
| 5-Methyl-THF                  | -0.51504 | 0.15172  | -5.9369  | 1.162    | 0.14569 | 0.75479  | 0.053215 | 0.20674 |
| 3-Hydroxy-3-methylglutary-CoA | -0.24359 | -0.1544  | -0.33173 | 0.057544 | 0.02877 | 0.36897  | 0.87168  | 0.70635 |
| 2-keto-D-gluconic acid        | 0.002625 | -0.25102 | ND       | 1.1401   | 0.98174 | 0.56495  | ND       | 0.60823 |
